# Supplementary material for: Taguchi Orthogonal Array Dataset for the Effect of Water Chemistry on Aggregation of ZnO Nanoparticles
Source: Preprints.org preprint supplement (doi:10.20944/preprints201805.0428.v1), 2018-05-29
Supplement: Supplementary file 1 [file supplementary]

## Sheet: Experimental data
Table S1. Survey scan of ZnO NPs suspension in nanopure water
Wavelenght (nm)	Absorbance
190	0.9991
195	0.998
200	0.995
205	0.99
210	0.9881
215	0.9855
220	0.9695
225	0.955
230	0.9415
235	0.9285
240	0.915
245	0.9035
250	0.8925
255	0.8795
260	0.869
265	0.857
270	0.8465
275	0.836
280	0.826
285	0.8155
290	0.811
295	0.803
300	0.794
305	0.786
310	0.7805
315	0.7755
320	0.7725
325	0.7725
330	0.7765
335	0.785
340	0.7975
345	0.8155
350	0.831
355	0.83
360	0.7029
365	0.5905
370	0.4595
375	0.3785
380	0.33
385	0.297
390	0.2705
395	0.249
400	0.2315
405	0.216
410	0.2035
415	0.192
420	0.182
425	0.1725
430	0.164
435	0.156
440	0.149
445	0.142
450	0.1365
455	0.1305
460	0.1255
465	0.1205
470	0.1155
475	0.1115
480	0.1075
485	0.1035
490	0.1
495	0.0965
500	0.0935
505	0.09
510	0.087
515	0.0845
520	0.082
525	0.08
530	0.077
535	0.075
540	0.0725
545	0.0705
550	0.068
555	0.0665
560	0.065
565	0.063
570	0.0615
575	0.0595
580	0.0585
585	0.057
590	0.0555
595	0.054
600	0.053
605	0.0515
610	0.0505
615	0.0495
620	0.048
625	0.047
630	0.0465
635	0.045
640	0.044
645	0.0435
650	0.0425
655	0.0415
660	0.0405
665	0.04
670	0.039
675	0.0385
680	0.0375
685	0.037
690	0.0365
695	0.0355
700	0.035
705	0.034
710	0.0335
715	0.033
720	0.0325
725	0.032
730	0.031
735	0.0305
740	0.03
745	0.03
750	0.029
755	0.0285
760	0.0285
765	0.028
770	0.0275
775	0.027
780	0.027
785	0.0265
790	0.026
795	0.0265
800	0.026
Table S2. Standard linear Curve of ZnO NPs at 365 nm
Concentration (mg/L)	Absorbance
0	0
1	0.004
5	0.025
10	0.063
20	0.155
50	0.421
100	0.847
Table S3. Turbidity of the solution at various time and power level of sonicator
Time	Power ( 100W)		Power (200W)		Power (400W)		Power (600W)
(min)	Turbidity NTU		Turbidity (NTU)		Turbidity (NTU)		Turbidity (NTU)
5	295		298		315		292
10	299		304		320		294
15	305		310		323		300
20	309		315		327		305
25	312		318		331		310
30	314		320		345		318
35	315		321		346		325
40	316		324		347		328
Table S4. Absorbance and zeta potential of ZnO NPs at avarious pH range
pH	Absorbance	Zeta potential (mV)
3	0.29	-9.5
4	0.41	-5.5
5	0.48	10.25
6	0.55	14
7	0.61	12.5
8	0.39	7
9	0.15	4
9.5	0.13	-5
10	0.23	-15.25
11	0.31	-25.43
12	0.35	-31
Table S5. Absorbance of ZnO NPs at different electrolyte concentration of KCl, Na2SO4 and MgCl2
Electrolyte concentration	KCl	Na2SO4	MgCl2
mM	Absorbance	Absorbance	Absorbance
0.01	0.61	0.61	0.61
0.05	0.6	0.581	0.582
0.1	0.595	0.578	0.551
0.25	0.583	0.55	0.48
1	0.581	0.463	0.4
2.5	0.578	0.4	0.26
10	0.551	0.29	0.17
15	0.33	0.22	0.11
25	0.24	0.2	0.08
50	0.2	0.16	……..
75	0.11	0.1	……..
100	0.09	0.09	……..
Table S6. Absorbance and corresponding zeta potential of ZnO NPs at various NOM concentrations of humic, salicyclic and citric acid
NOM concentration	Humic acid		Salicyclic acid		Citric acid
mg/L	Absorbance	Zeta potential (mV)	Absorbance	Zeta potential (mV)	Absorbance	Zeta potential (mV)
1	0.52	6	0.53	8	0.65	-6
2.5	0.63	-14	0.44	-2.5	0.69	-12
5	0.7	-17	0.68	-14	0.71	-15
10	0.74	-20	0.69	-20	0.73	-19
15	0.75	……..	0.72	……..	0.74	……..
25	0.76	………	0.73	……..	0.76	……..
50	0.76	-30	0.73	-27	0.63	-30
75	0.77	………	0.73	……..	0.61	……..
100	0.78	-36	0.75	-32	0.55	-36
Table S7. Normalized absorbance of ZnO NPs at various experimental conditions
Time	pH 3	pH 6	pH 7	pH 9	pH 12	KCl (1 mM)	Na2SO4 (10mM)	MgCl (15mM)	KCl (50mM)	Na2SO4 (100 mM)	Humic Acid (0 mg/L)	Humic Acid (1mg/L)	Humic Acid (25 mg/L)	Humic acid (100 mg/L)	Salicylic acid (0 mg/L)	Salicylic acid (1 mg/L)	Salicylic acid ( 10 mg/L)	Salicylic acid (100 mg/L)	Citric acid (0 mg/L)	Citric acid (1 mg/L)	Citric acid (10 mg/L)	Citric acid (100 mg/L)
0	1	1	1	1	1	1	1	1	1	1	1	1	1	1	1	1	1	1	1	1	1	1
3	0.99918	0.998	0.99344	0.98	0.96476	0.99344	0.95382	0.95959	0.87815	0.93073	0.99344	0.98	0.999	0.99766	0.99344	0.98	0.98741	0.99611	0.99344	0.9915	1.01	0.97464
6	0.99915	0.994	0.98033	0.9	0.95077	0.98033	0.92507	0.87426	0.82779	0.9077	0.98033	0.94241	0.9991	0.99729	0.98033	0.959	0.97722	0.98995	0.98033	0.9616	1.012	0.96705
9	0.99157	0.996	0.98033	0.85	0.93701	0.98033	0.90991	0.85174	0.79214	0.88681	0.98033	0.94984	0.99851	0.99708	0.98033	0.94428	0.96991	0.98995	0.98033	0.96191	1.013	0.94354
12	0.98623	0.99579	0.97869	0.8	0.9235	0.97869	0.88622	0.82832	0.83233	0.87138	0.97869	0.94373	0.9955	0.9954	0.97869	0.93332	0.97155	0.99103	0.97869	0.9545	1.014	0.92543
15	0.96867	0.99474	0.97541	0.75	0.91023	0.97541	0.8601	0.77967	0.8142	0.83746	0.97541	0.92836	0.99247	0.99267	0.97541	0.92433	0.96696	0.98687	0.97541	0.953	1.015	0.91499
18	0.9405	0.98211	0.97213	0.70148	0.8972	0.97213	0.84124	0.75677	0.79758	0.79178	0.97213	0.90178	0.98943	0.99138	0.97213	0.91037	0.96676	0.98687	0.97213	0.9535	1.016	0.90995
21	0.93092	0.97263	0.96721	0.70886	0.88442	0.96721	0.81898	0.73968	0.78114	0.78195	0.96721	0.88534	0.98637	0.98992	0.96721	0.89707	0.96324	0.98364	0.96721	0.947	1.02	0.91956
24	0.91325	0.96737	0.96066	0.72145	0.87188	0.96066	0.80169	0.70899	0.76298	0.75816	0.96066	0.87003	0.9833	0.98743	0.96066	0.88433	0.95946	0.98364	0.96066	0.948	1.021	0.92131
27	0.89639	0.95789	0.9541	0.65887	0.85958	0.9541	0.78964	0.68282	0.75831	0.73932	0.9541	0.85707	0.98022	0.98647	0.9541	0.87232	0.95896	0.98364	0.9541	0.9428	1.019	0.91694
30	0.89759	0.95158	0.95082	0.64473	0.84752	0.95082	0.77374	0.66683	0.73917	0.71153	0.95082	0.85012	0.97712	0.98594	0.95082	0.86123	0.95619	0.98056	0.95082	0.937	1.01839	0.91607
33	0.87823	0.94526	0.94672	0.6602	0.8357	0.94672	0.75414	0.65288	0.71817	0.70987	0.94672	0.84491	0.97402	0.98422	0.94672	0.85088	0.95291	0.98087	0.94672	0.9305	1.01576	0.91169
36	0.86432	0.93789	0.93853	0.63397	0.82413	0.93853	0.73233	0.61989	0.71752	0.67366	0.93853	0.83089	0.97089	0.98289	0.93853	0.84128	0.95166	0.97348	0.93853	0.9245	1.00876	0.90382
39	0.85422	0.93158	0.93197	0.623	0.8128	0.93197	0.72552	0.58633	0.69335	0.63603	0.93197	0.82251	0.96776	0.9817	0.93197	0.83236	0.94763	0.97348	0.93197	0.91675	1.00613	0.87595
42	0.83976	0.92947	0.92705	0.60933	0.80171	0.92705	0.72047	0.58945	0.68338	0.63127	0.92705	0.81623	0.96376	0.97984	0.92705	0.82405	0.9436	0.9704	0.92705	0.907	1.00088	0.84293
45	0.8253	0.92	0.92131	0.58333	0.79087	0.92131	0.71157	0.57893	0.63444	0.62273	0.92131	0.80942	0.95989	0.97878	0.92131	0.81627	0.94018	0.9704	0.92131	0.8945	0.99825	0.84
48	0.82169	0.91684	0.91393	0.57068	0.78026	0.91393	0.69521	0.55884	0.63243	0.62302	0.91393	0.80157	0.95597	0.97812	0.91393	0.80898	0.93365	0.97024	0.91393	0.9065	0.99037	0.83611
51	0.81566	0.90421	0.90984	0.55485	0.7699	0.90984	0.68763	0.54562	0.63233	0.5821	0.90984	0.79686	0.95256	0.97719	0.90984	0.8021	0.9259	0.96732	0.90984	0.9015	0.98774	0.82951
54	0.80482	0.89579	0.90328	0.53903	0.75978	0.90328	0.68426	0.53769	0.61162	0.5821	0.90328	0.79319	0.94919	0.97613	0.90328	0.79561	0.92788	0.96742	0.90328	0.89382	0.98511	0.82514
57	0.79277	0.89053	0.89672	0.52321	0.74991	0.89672	0.66995	0.52976	0.61329	0.57258	0.89672	0.789	0.94613	0.97493	0.89672	0.78918	0.9292	0.95716	0.89672	0.8913	0.98249	0.81814
60	0.78434	0.89053	0.89262	0.51266	0.74027	0.89262	0.65058	0.51231	0.60008	0.55629	0.89262	0.78429	0.94338	0.97387	0.89262	0.78291	0.92622	0.95685	0.89262	0.894	0.97986	0.81115
63	0.77831	0.88316	0.88689	0.49789	0.73088	0.88689	0.64469	0.48852	0.59567	0.53466	0.88689	0.78168	0.94064	0.97175	0.88689	0.77685	0.92387	0.95048	0.88689	0.8845	0.97461	0.80315
66	0.77108	0.88842	0.88033	0.49086	0.72173	0.88033	0.64637	0.48059	0.59063	0.53581	0.88033	0.77853	0.93814	0.97096	0.88033	0.77107	0.9227	0.9473	0.88033	0.8825	0.97198	0.80153
69	0.76385	0.88842	0.87787	0.48101	0.71283	0.87787	0.63068	0.48059	0.57877	0.51989	0.87787	0.77435	0.93634	0.96989	0.87787	0.7655	0.9227	0.94792	0.87787	0.881	0.96935	0.79541
72	0.75759	0.8779	0.87049	0.46816	0.70416	0.87049	0.61185	0.45179	0.57402	0.51435	0.87049	0.76806	0.9346	0.9687	0.87049	0.77697	0.91993	0.9473	0.87049	0.8785	0.9641	0.79104
75	0.74699	0.8779	0.86557	0.45781	0.69537	0.86557	0.60848	0.43459	0.56193	0.48535	0.86557	0.7644	0.93278	0.96794	0.86557	0.77659	0.91968	0.9446	0.86557	0.87786	0.9641	0.78404
78	0.73855	0.86947	0.8623	0.45042	0.68719	0.8623	0.59352	0.43459	0.55363	0.47295	0.8623	0.75969	0.93108	0.96724	0.8623	0.77208	0.91691	0.94099	0.8623	0.875	0.95884	0.78142
81	0.72771	0.86421	0.8541	0.43987	0.67966	0.8541	0.57186	0.4182	0.55136	0.44887	0.8541	0.7555	0.92976	0.96631	0.8541	0.77183	0.9159	0.94007	0.8541	0.8725	0.95622	0.77705
84	0.72193	0.86105	0.85164	0.43038	0.67257	0.85164	0.56975	0.38086	0.54481	0.43578	0.85164	0.75236	0.92781	0.96552	0.85164	0.76907	0.91489	0.94099	0.85164	0.8685	0.95359	0.77268
87	0.71325	0.85789	0.84754	0.41983	0.66596	0.84754	0.56639	0.38066	0.54035	0.42455	0.84754	0.74857	0.92579	0.96472	0.84754	0.76581	0.91313	0.94007	0.84754	0.864	0.95359	0.76918
90	0.70482	0.84737	0.84098	0.4135	0.65952	0.84098	0.56386	0.37908	0.52719	0.42508	0.84098	0.74503	0.92392	0.96393	0.84098	0.76268	0.91112	0.94344	0.84098	0.8635	0.94834	0.76481
93	0.6988	0.84632	0.83934	0.4019	0.65284	0.83934	0.55951	0.37432	0.51662	0.4219	0.83934	0.74189	0.92266	0.96286	0.83934	0.7623	0.91036	0.94453	0.83934	0.861	0.94834	0.75869
96	0.69277	0.84	0.83443	0.39346	0.64641	0.83443	0.55207	0.36639	0.51662	0.41133	0.83443	0.7377	0.92131	0.96194	0.83443	0.75693	0.9086	0.94179	0.83443	0.859	0.94308	0.75607
99	0.68795	0.83368	0.82787	0.38638	0.63997	0.82787	0.54871	0.3715	0.51057	0.40181	0.82787	0.7356	0.9199	0.96154	0.82787	0.75719	0.90683	0.94099	0.82787	0.8565	0.94308	0.75169
102	0.68072	0.83579	0.82459	0.37975	0.63353	0.82459	0.54786	0.35212	0.5005	0.40128	0.82459	0.73194	0.91827	0.96088	0.82459	0.75365	0.90407	0.94068	0.82459	0.85422	0.93783	0.74645
105	0.6747	0.82842	0.82295	0.3743	0.62761	0.82295	0.54281	0.35212	0.5003	0.3997	0.82295	0.72356	0.91706	0.96035	0.82295	0.75102	0.90381	0.94099	0.82295	0.8535	0.93783	0.7412
108	0.66868	0.82737	0.81721	0.36709	0.62152	0.81721	0.53692	0.34577	0.48338	0.38701	0.81721	0.72461	0.91612	0.96021	0.81721	0.75207	0.90281	0.94191	0.81721	0.85225	0.93783	0.73771
111	0.66265	0.82042	0.81475	0.3576	0.61546	0.81475	0.53271	0.33943	0.48338	0.37876	0.81475	0.71976	0.91464	0.96067	0.81475	0.74846	0.9018	0.93883	0.81475	0.849	0.93257	0.73421
114	0.65904	0.81789	0.81147	0.35021	0.60966	0.81147	0.52934	0.32674	0.4864	0.37432	0.81147	0.70942	0.91333	0.95921	0.81147	0.745	0.90054	0.93745	0.81147	0.848	0.93257	0.72809
117	0.65542	0.81368	0.8082	0.3487	0.60385	0.8082	0.52765	0.32674	0.48209	0.37749	0.8082	0.71047	0.9121	0.95809	0.8082	0.74199	0.89978	0.93512	0.8082	0.847	0.9282	0.72546
120	0.65542	0.81053	0.8041	0.34177	0.5979	0.8041	0.52092	0.32515	0.47382	0.36956	0.8041	0.70995	0.91042	0.95822	0.8041	0.73883	0.89853	0.93437	0.8041	0.8445	0.9282	0.72197
123	0.65904	0.8021	0.80082	0.33568	0.59229	0.80082	0.51587	0.31563	0.4713	0.36163	0.80082	0.70314	0.90915	0.95743	0.80082	0.73472	0.89676	0.93539	0.80082	0.843	0.92557	0.72022
126	0.64217	0.80526	0.79836	0.32958	0.58691	0.79836	0.51166	0.30929	0.46828	0.35687	0.79836	0.70157	0.9079	0.95623	0.79836	0.73462	0.89777	0.93129	0.79836	0.842	0.92294	0.71672
129	0.63614	0.80316	0.79426	0.32384	0.58161	0.79426	0.50829	0.30295	0.4577	0.35529	0.79426	0.70366	0.90677	0.95557	0.79426	0.73286	0.89601	0.93129	0.79426	0.84	0.92294	0.71497
132	0.6407	0.79474	0.7918	0.3154	0.57623	0.7918	0.50408	0.30136	0.45619	0.34577	0.7918	0.69738	0.90546	0.95504	0.7918	0.72845	0.8945	0.92806	0.7918	0.8384	0.91769	0.71147
135	0.62651	0.79368	0.78934	0.31118	0.57103	0.78934	0.50071	0.29502	0.45619	0.34101	0.78934	0.69476	0.90463	0.95438	0.78934	0.7286	0.89399	0.92806	0.78934	0.8375	0.91769	0.7106
138	0.61566	0.78421	0.78688	0.30591	0.56609	0.78688	0.49819	0.29026	0.45166	0.33784	0.78688	0.69476	0.90345	0.95371	0.78688	0.72544	0.89349	0.92806	0.78688	0.8335	0.91769	0.7071
141	0.61205	0.78	0.78279	0.30063	0.56129	0.78279	0.49398	0.2855	0.4426	0.33149	0.78279	0.69162	0.90281	0.95332	0.78279	0.72349	0.89248	0.92806	0.78279	0.831	0.91769	0.7071
144	0.60482	0.7779	0.78115	0.29325	0.55662	0.78115	0.49145	0.28233	0.44109	0.32515	0.78115	0.68953	0.90204	0.95278	0.78115	0.71897	0.89097	0.92806	0.78115	0.8305	0.91243	0.70448
147	0.59904	0.77474	0.77869	0.29325	0.55209	0.77869	0.4864	0.2744	0.43807	0.32515	0.77869	0.68744	0.90191	0.95225	0.77869	0.71942	0.89097	0.92113	0.77869	0.83	0.91243	0.70273
150	0.59398	0.77368	0.77623	0.29114	0.54751	0.77623	0.48303	0.26964	0.42598	0.31563	0.77623	0.68639	0.90089	0.95199	0.77623	0.71867	0.88971	0.92113	0.77623	0.828	0.91243	0.70273
153	0.59157	0.76632	0.77295	0.28375	0.54299	0.77295	0.48135	0.26647	0.42447	0.31246	0.77295	0.68429	0.89994	0.95146	0.77295	0.71617	0.8882	0.91864	0.77295	0.8275	0.91243	0.69924
156	0.58675	0.77053	0.77131	0.2827	0.53835	0.77131	0.47545	0.26329	0.41994	0.30929	0.77131	0.68063	0.89882	0.95093	0.77131	0.71308	0.8882	0.91789	0.77131	0.8265	0.91243	0.69924
159	0.58193	0.76526	0.76803	0.27532	0.53381	0.76803	0.47208	0.26686	0.4139	0.30453	0.76803	0.6801	0.8978	0.95066	0.76803	0.71025	0.88694	0.91828	0.76803	0.825	0.90806	0.69749
162	0.57831	0.76105	0.76639	0.27321	0.52933	0.76639	0.4704	0.25219	0.40937	0.30136	0.76639	0.67906	0.89634	0.9508	0.76639	0.7104	0.88518	0.92113	0.76639	0.824	0.90806	0.69399
165	0.5747	0.76421	0.76311	0.26793	0.52492	0.76311	0.46872	0.24743	0.40937	0.29343	0.76311	0.67592	0.89562	0.95027	0.76311	0.70363	0.88442	0.92113	0.76311	0.82075	0.90806	0.69399
168	0.56988	0.75158	0.76148	0.26688	0.52058	0.76148	0.46451	0.24743	0.4003	0.29343	0.76148	0.67487	0.8947	0.94974	0.76148	0.70513	0.88392	0.91789	0.76148	0.81733	0.90806	0.69399
171	0.56717	0.75263	0.75984	0.26477	0.51625	0.75984	0.46114	0.24109	0.39879	0.29184	0.75984	0.67487	0.89384	0.94907	0.75984	0.70603	0.88291	0.91789	0.75984	0.817	0.90806	0.69224
174	0.56627	0.75263	0.75656	0.26055	0.51206	0.75656	0.4603	0.23791	0.38922	0.28708	0.75656	0.67225	0.89296	0.94591	0.75656	0.70363	0.88216	0.91481	0.75656	0.81475	0.90806	0.69224
177	0.56386	0.74947	0.75492	0.25422	0.50793	0.75492	0.45693	0.23791	0.38973	0.28708	0.75492	0.67068	0.89177	0.94801	0.75492	0.70288	0.88115	0.91481	0.75492	0.8125	0.90543	0.69224
180	0.55663	0.75263	0.75328	0.25105	0.50388	0.75328	0.45356	0.22998	0.38217	0.27598	0.75328	0.67068	0.89025	0.94774	0.75328	0.69836	0.88014	0.91435	0.75328	0.8115	0.9028	0.69137
183	0.55301	0.74737	0.75082	0.24895	0.49987	0.75082	0.44935	0.22681	0.37764	0.27281	0.75082	0.66859	0.88862	0.94735	0.75082	0.70062	0.87964	0.91481	0.75082	0.81143	0.9028	0.68962
186	0.55181	0.7421	0.75	0.24578	0.49577	0.75	0.44598	0.22205	0.36979	0.26805	0.75	0.66754	0.88701	0.94695	0.75	0.69962	0.87813	0.91474	0.75	0.808	0.9028	0.68962
189	0.54699	0.74526	0.74672	0.24473	0.49208	0.74672	0.44683	0.21571	0.37009	0.26805	0.74672	0.66597	0.88473	0.94642	0.74672	0.69546	0.87712	0.91158	0.74672	0.808	0.90017	0.68962
192	0.54337	0.73684	0.74508	0.24074	0.48874	0.74508	0.44093	0.21571	0.36707	0.26488	0.74508	0.6644	0.88285	0.94615	0.74508	0.69724	0.87712	0.91127	0.74508	0.807	0.90017	0.687
195	0.53976	0.73263	0.74508	0.23945	0.48579	0.74508	0.43756	0.20937	0.36103	0.25536	0.74508	0.6644	0.88081	0.94562	0.74508	0.69561	0.87637	0.91127	0.74508	0.8065	0.90017	0.687
198	0.5391	0.73263	0.7418	0.23312	0.48319	0.7418	0.43201	0.20619	0.36556	0.24981	0.7418	0.66178	0.87915	0.94522	0.7418	0.68746	0.87435	0.91127	0.7418	0.8055	0.90017	0.687
201	0.53373	0.72632	0.74098	0.22996	0.48038	0.74098	0.43251	0.20302	0.35952	0.2506	0.74098	0.66283	0.87818	0.94509	0.74098	0.68883	0.8736	0.91127	0.74098	0.803	0.90017	0.687
204	0.52771	0.72737	0.74098	0.22679	0.47755	0.74098	0.43167	0.19985	0.35196	0.26465	0.74098	0.66073	0.8766	0.94496	0.74098	0.68678	0.87284	0.91127	0.74098	0.8025	0.89755	0.687
207	0.5241	0.72421	0.73716	0.22785	0.4751	0.73716	0.42915	0.19985	0.34894	0.24426	0.73716	0.65812	0.87522	0.94469	0.73716	0.68558	0.87209	0.91189	0.73716	0.801	0.89755	0.68525
210	0.52048	0.72	0.73771	0.22257	0.47247	0.73771	0.42662	0.19985	0.31647	0.24267	0.73771	0.65916	0.87411	0.94456	0.73771	0.68257	0.87133	0.90789	0.73771	0.799	0.89755	0.6835
213	0.51807	0.72316	0.73525	0.21941	0.46967	0.73525	0.42662	0.19033	0.34592	0.2395	0.73525	0.6555	0.87269	0.9443	0.73525	0.68257	0.86957	0.90819	0.73525	0.797	0.89755	0.6835
216	0.51687	0.71579	0.73443	0.21519	0.46689	0.73443	0.42662	0.19351	0.33686	0.2395	0.73443	0.65602	0.87155	0.94403	0.73443	0.68482	0.86957	0.90572	0.73443	0.7975	0.89492	0.68175
219	0.51446	0.71263	0.73443	0.21624	0.46403	0.73443	0.4283	0.19192	0.33051	0.2395	0.73443	0.65602	0.87069	0.94377	0.73443	0.68181	0.86856	0.90465	0.73443	0.796	0.89492	0.6835
222	0.51446	0.71053	0.73115	0.21624	0.46114	0.73115	0.42578	0.19509	0.33082	0.2395	0.73115	0.65236	0.86916	0.9435	0.73115	0.67906	0.8673	0.90626	0.73115	0.7935	0.89229	0.6835
225	0.51325	0.71053	0.73049	0.21413	0.45825	0.73049	0.42325	0.19033	0.32628	0.23791	0.73049	0.6534	0.8684	0.94337	0.73049	0.6773	0.86755	0.90789	0.73049	0.79229	0.89229	0.68525
228	0.50964	0.70211	0.72869	0.20675	0.45537	0.72869	0.41904	0.18557	0.32326	0.23157	0.72869	0.65183	0.86745	0.9431	0.72869	0.67625	0.8668	0.90789	0.72869	0.794	0.89229	0.68787
231	0.50602	0.69789	0.72541	0.20359	0.45251	0.72541	0.4182	0.18399	0.32024	0.22681	0.72541	0.64869	0.86652	0.94281	0.72541	0.6763	0.8668	0.90142	0.72541	0.793	0.89229	0.68525
234	0.50361	0.70105	0.72541	0.20359	0.44958	0.72541	0.41652	0.1824	0.32024	0.22681	0.72541	0.65183	0.8658	0.94271	0.72541	0.67547	0.86579	0.90142	0.72541	0.791	0.89229	0.68472
237	0.50361	0.69474	0.72377	0.20675	0.44663	0.72377	0.41062	0.1898	0.32024	0.2284	0.72377	0.6466	0.8645	0.94244	0.72377	0.6758	0.86453	0.90142	0.72377	0.7935	0.89229	0.687
240	0.50094	0.69684	0.72377	0.20121	0.44369	0.72377	0.40725	0.17289	0.3142	0.21412	0.72377	0.64555	0.86352	0.94244	0.72377	0.66993	0.86352	0.90142	0.72377	0.79	0.89229	0.68437
243	0.49853	0.69263	0.72213	0.19567	0.44073	0.72213	0.40304	0.16971	0.30362	0.20937	0.72213	0.64817	0.86271	0.94164	0.72213	0.67204	0.86352	0.90111	0.72213	0.7865	0.89229	0.6765
246	0.49639	0.68632	0.72213	0.19409	0.43781	0.72213	0.40052	0.16178	0.30816	0.20937	0.72213	0.64189	0.86143	0.94019	0.72213	0.67504	0.86201	0.90142	0.72213	0.785	0.89229	0.67563
249	0.49518	0.68947	0.72049	0.20042	0.43495	0.72049	0.39799	0.15861	0.31118	0.20144	0.72049	0.6445	0.86084	0.93992	0.72049	0.66903	0.86176	0.90111	0.72049	0.7845	0.89229	0.6765
252	0.49879	0.68	0.71885	0.1965	0.4321	0.71885	0.39968	0.15385	0.30212	0.20461	0.71885	0.64241	0.85994	0.93979	0.71885	0.66978	0.86101	0.90142	0.71885	0.7845	0.89229	0.67475
255	0.48899	0.67684	0.71557	0.19304	0.42921	0.71557	0.39782	0.15385	0.30665	0.20461	0.71557	0.63717	0.85914	0.93939	0.71557	0.66903	0.86101	0.90142	0.71557	0.7825	0.89229	0.67475
258	0.48007	0.68316	0.71475	0.19198	0.42629	0.71475	0.39378	0.15861	0.29532	0.20302	0.71475	0.64189	0.8581	0.93899	0.71475	0.66602	0.86076	0.8948	0.71475	0.781	0.88967	0.67213
261	0.47229	0.67368	0.71475	0.19198	0.42346	0.71475	0.39294	0.14909	0.29003	0.19668	0.71475	0.63613	0.85786	0.93873	0.71475	0.66627	0.86	0.8948	0.71475	0.7825	0.88967	0.67213
264	0.47108	0.66526	0.71393	0.18776	0.42061	0.71393	0.39294	0.14909	0.28701	0.19192	0.71393	0.63542	0.8578	0.93859	0.71393	0.66512	0.85849	0.8948	0.71393	0.781	0.88967	0.67038
267	0.46626	0.67263	0.71393	0.18882	0.41778	0.71393	0.38957	0.14592	0.28399	0.19033	0.71393	0.63874	0.85726	0.93833	0.71393	0.66282	0.85723	0.8948	0.71393	0.7805	0.88704	0.66951
270	0.46506	0.66421	0.7123	0.1846	0.41507	0.7123	0.38873	0.14275	0.28399	0.19033	0.7123	0.62996	0.85704	0.93793	0.7123	0.66038	0.85849	0.8948	0.7123	0.78	0.88704	0.66951
273	0.46265	0.66	0.7123	0.18144	0.41246	0.7123	0.38705	0.14275	0.27643	0.18716	0.7123	0.63455	0.8566	0.9378	0.7123	0.66451	0.85849	0.8948	0.7123	0.778	0.88704	0.66951
276	0.45904	0.66105	0.70984	0.17933	0.40978	0.70984	0.38789	0.14275	0.27492	0.19033	0.70984	0.63351	0.85651	0.93767	0.70984	0.6585	0.85723	0.89557	0.70984	0.778	0.88704	0.67126
279	0.45663	0.65	0.70902	0.18038	0.40704	0.70902	0.38536	0.14275	0.27492	0.18557	0.70902	0.62932	0.85614	0.93727	0.70902	0.66	0.85723	0.89141	0.70902	0.7775	0.88704	0.66951
282	0.45542	0.65158	0.70738	0.18038	0.40428	0.70738	0.38452	0.13641	0.27795	0.18716	0.70738	0.63351	0.8553	0.93687	0.70738	0.65774	0.85748	0.89141	0.70738	0.7775	0.88704	0.66951
285	0.45301	0.65263	0.70574	0.17722	0.40148	0.70574	0.38368	0.13482	0.2719	0.1824	0.70574	0.63089	0.85489	0.93661	0.70574	0.65699	0.85522	0.8948	0.70574	0.7745	0.88704	0.66863
288	0.4506	0.64211	0.70574	0.17412	0.3987	0.70574	0.38031	0.13482	0.26737	0.1824	0.70574	0.62723	0.8541	0.93647	0.70574	0.65458	0.85396	0.8948	0.70574	0.774	0.88704	0.66776
291	0.44699	0.64526	0.7041	0.1635	0.39596	0.7041	0.37947	0.13165	0.26284	0.18082	0.7041	0.63194	0.85346	0.93634	0.7041	0.65473	0.85295	0.89172	0.7041	0.775	0.88704	0.66601
294	0.44578	0.64211	0.7041	0.1635	0.39322	0.7041	0.37778	0.12847	0.26133	0.17923	0.7041	0.62553	0.8531	0.93607	0.7041	0.65699	0.8527	0.89141	0.7041	0.7715	0.88704	0.66251
297	0.44247	0.64211	0.7041	0.16561	0.39056	0.7041	0.37778	0.12847	0.26284	0.17923	0.7041	0.62775	0.85232	0.93581	0.7041	0.65368	0.8527	0.89141	0.7041	0.772	0.88704	0.66077
300	0.44096	0.64737	0.70246	0.16772	0.38802	0.70246	0.37694	0.12847	0.25723	0.18082	0.70246	0.62932	0.85174	0.93554	0.70246	0.65312	0.85194	0.89141	0.70246	0.774	0.88704	0.66251
303	0.43976	0.64105	0.70246	0.15506	0.38552	0.70246	0.37778	0.12847	0.26042	0.18082	0.70246	0.62199	0.85162	0.93541	0.70246	0.64857	0.85068	0.89141	0.70246	0.771	0.88704	0.65902
306	0.43735	0.64011	0.7014	0.15717	0.38311	0.7	0.37694	0.12847	0.2568	0.18082	0.7	0.6267	0.85132	0.93541	0.7	0.65097	0.85043	0.89141	0.7	0.7705	0.88704	0.65902
309	0.43494	0.64537	0.69918	0.15295	0.38072	0.69918	0.37357	0.12847	0.25126	0.17289	0.69918	0.62461	0.85036	0.93501	0.69918	0.64671	0.85194	0.89141	0.69918	0.771	0.88704	0.65902
312	0.43253	0.641	0.69918	0.14979	0.37829	0.69918	0.37021	0.12054	0.25378	0.16971	0.69918	0.62147	0.85017	0.93475	0.69918	0.64646	0.84993	0.89141	0.69918	0.77	0.88704	0.65727
315	0.43133	0.639	0.69754	0.14979	0.37602	0.69754	0.36937	0.12054	0.25982	0.16654	0.69754	0.62513	0.85003	0.93448	0.69754	0.64345	0.84968	0.89141	0.69754	0.7675	0.88704	0.65727
318	0.43133	0.6399	0.69672	0.14604	0.37384	0.69672	0.36937	0.1142	0.24924	0.16654	0.69672	0.62094	0.84994	0.93422	0.69672	0.64857	0.84892	0.89141	0.69672	0.77	0.88704	0.65727
321	0.42771	0.6388	0.69672	0.13924	0.37174	0.69672	0.36937	0.1142	0.24572	0.16337	0.69672	0.62042	0.84991	0.93382	0.69672	0.65097	0.84691	0.89141	0.69672	0.768	0.88704	0.65727
324	0.42741	0.6377	0.69672	0.13819	0.36961	0.69672	0.36684	0.1142	0.24924	0.16337	0.69672	0.62251	0.84993	0.93369	0.69672	0.64671	0.8459	0.89233	0.69672	0.767	0.88704	0.65465
327	0.4253	0.6375	0.69836	0.13713	0.36793	0.69836	0.36684	0.11261	0.24773	0.16337	0.69836	0.61833	0.85	0.93342	0.69836	0.64646	0.84565	0.88818	0.69836	0.765	0.88704	0.65465
330	0.4241	0.6372	0.69426	0.13713	0.36619	0.69426	0.36431	0.11261	0.23716	0.16337	0.69426	0.61937	0.85013	0.93316	0.69426	0.64345	0.84389	0.88818	0.69426	0.765	0.88704	0.65465
333	0.42169	0.637	0.69426	0.13743	0.36433	0.69426	0.36179	0.11103	0.24018	0.1602	0.69426	0.61885	0.85031	0.93289	0.69426	0.64857	0.84137	0.88655	0.69426	0.7635	0.88704	0.65465
336	0.41687	0.6355	0.69262	0.13502	0.36222	0.69262	0.36095	0.10627	0.24018	0.15227	0.69262	0.61885	0.85055	0.93273	0.69262	0.65097	0.84086	0.8851	0.69262	0.763	0.88704	0.65465
339	0.41446	0.635	0.69426	0.1308	0.36034	0.69426	0.35926	0.10627	0.24018	0.15068	0.69426	0.62042	0.85084	0.93249	0.69426	0.64671	0.8396	0.88639	0.69426	0.7625	0.88704	0.6529
342	0.41325	0.634	0.6918	0.1308	0.35866	0.6918	0.35842	0.10468	0.24018	0.14909	0.6918	0.61885	0.85118	0.93236	0.6918	0.64646	0.83891	0.88818	0.6918	0.761	0.88704	0.6529
345	0.41084	0.6339	0.6918	0.12975	0.35702	0.6918	0.35842	0.1031	0.23565	0.15068	0.6918	0.61728	0.85158	0.93223	0.6918	0.64345	0.83835	0.8891	0.6918	0.762	0.88704	0.65202
348	0.40843	0.6335	0.68934	0.1308	0.35544	0.68934	0.35758	0.1031	0.23263	0.14909	0.68934	0.61833	0.85203	0.9321	0.68934	0.64345	0.83835	0.8851	0.68934	0.76	0.88704	0.65202
351	0.40723	0.6334	0.68934	0.12869	0.35391	0.688	0.356	0.103	0.231	0.147	0.68934	0.61675	0.85203	0.93156	0.68934	0.64857	0.83784	0.88612	0.68934	0.76	0.88704	0.65202
354	0.40621	0.6321	0.6892	0.12862	0.3538	0.687	0.355	0.102	0.23	0.145	0.68853	0.61571	0.85203	0.93117	0.688	0.641	0.835	0.882	0.687	0.758	0.886	0.651
357	0.40512	0.6319	0.6891	0.1286	0.3537	0.685	0.354	0.101	0.292	0.141	0.687	0.613	0.851	0.928	0.687	0.642	0.831	0.879	0.686	0.755	0.886	0.651
360	0.40431	0.6314	0.689	0.1285	0.3532	0.683	0.352	0.1	0.285	0.14	0.685	0.611	0.849	0.925
Table S8. FT-IR spectra of ZnO NPs before and after interaction with 100 mg/L concentration of various NOM
Wave number	Humic acid	ZnO-Humic acid	Salicylic acid	ZnO-Salicylic acid	Citric acid	ZnO-Citric acid	Commercial ZnO NPs	Background
cm-1	Transmittance (%)	Transmittance (%)	Transmittance (%)	Transmittance (%)	Transmittance (%)	Transmittance (%)	Transmittance (%)	Transmittance (%)
500	32.3646	44.8261	43.4517	25.622	46.3481	38.6052	54.0012	0.0161655
500.97	32.3739	44.7376	43.2485	25.6025	46.3987	38.6679	54.0012	0.0188137
501.94	32.3832	44.6452	43.0603	25.5822	46.4197	38.7287	53.9945	0.0194317
502.91	32.3925	44.5492	42.9207	25.5564	46.3974	38.7876	53.9815	0.0193007
503.88	32.4018	44.4498	42.8486	25.5212	46.3273	38.8447	53.9585	0.0196104
504.85	32.4112	44.3474	42.8447	25.4745	46.2163	38.9023	53.925	0.0205843
505.82	32.4205	44.2422	42.8946	25.416	46.0816	38.7876	53.9125	0.0214636
506.79	32.4298	44.1344	42.9798	25.3483	45.9473	38.8447	53.8825	0.0213171
507.76	32.4391	44.0244	43.0896	25.2758	45.8387	38.9023	53.862	0.0199894
508.73	32.4484	43.9124	43.2255	25.2042	45.776	38.8447	53.6155	0.0184155
509.7	32.4578	43.7987	43.3959	25.1374	45.7664	38.9023	53.416	0.0180633
510.67	32.4671	43.6836	43.6064	25.0756	45.8002	38.5855	53.2726	0.0199705
511.64	32.4764	43.5673	43.8512	25.0155	45.8524	38.5855	53.151	0.0241244
512.61	32.4857	43.4501	44.1143	24.9503	45.8902	38.6481	53.0118	0.0296025
513.58	32.495	43.3323	44.3741	24.8737	45.8872	38.709	52.8507	0.0352642
514.55	32.5044	43.2141	44.6063	24.7819	45.8331	38.5855	52.6988	0.0403972
515.52	32.5137	43.0959	44.7838	24.675	45.7379	38.6481	52.589	0.0448644
516.49	32.523	42.9779	44.8826	24.5562	45.6257	38.709	52.5239	0.0487717
517.46	32.5323	42.8603	44.8977	24.4294	45.5232	38.7678	52.4732	0.0520542
518.43	32.5416	42.7435	44.8642	24.2971	45.4492	38.825	52.4005	0.054362
519.4	32.551	42.6278	44.8653	24.1592	45.4102	38.8825	52.2921	0.0553161
520.37	32.5603	42.5133	45.0114	24.0146	45.4029	38.8822	52.165	0.0548961
521.34	32.5696	42.4003	45.3844	23.8642	45.421	38.5035	52.0486	0.0536677
522.31	32.5789	42.2892	45.9781	23.7117	45.4586	38.1662	51.9547	0.052711
523.28	32.5882	42.1802	46.6741	23.5627	45.5102	37.8923	51.8647	0.0533028
524.25	32.5976	42.0736	47.279	23.4209	45.5665	37.6742	51.7467	0.0564916
525.22	32.6069	41.9697	47.603	23.283	45.6123	37.4754	51.5901	0.0627038
526.19	32.6162	41.8686	47.5388	23.1368	45.63	37.2548	51.4241	0.0715139
527.16	32.6255	41.7708	47.1003	22.9664	45.6061	36.9911	51.2978	0.0817059
528.13	32.6349	41.6764	46.4009	22.7642	45.5388	36.6897	51.2304	0.0916743
529.1	32.6442	41.5858	45.5928	22.5368	45.4398	36.3749	51.1878	0.100041
530.07	32.6535	41.4992	44.8055	22.3009	45.3293	36.0753	51.1168	0.106198
531.04	32.6628	41.4169	44.1147	22.0758	45.2269	35.8101	50.9967	0.110467
532.01	32.6721	41.3391	43.5448	21.8747	45.1448	35.58	50.8532	0.113818
532.98	32.6814	41.2662	43.0943	21.6976	45.0849	35.3721	50.7279	0.117304
533.95	32.6908	41.1983	42.7591	21.5334	45.0418	35.1705	50.6386	0.121597
534.92	32.7001	41.1472	42.5451	21.3722	45.0064	34.9646	50.5646	0.126794
535.89	32.7094	41.1046	42.4693	21.2137	44.9697	34.7512	50.4733	0.132508
536.86	32.7187	41.0712	42.5585	21.0654	44.9233	34.5337	50.3595	0.138053
537.83	32.728	41.0477	42.8481	20.9365	44.8606	34.3226	50.2536	0.142598
538.8	32.7374	41.0334	43.3691	20.8313	44.7792	34.1328	50.1888	0.145322
539.77	32.7467	41.0274	44.1073	20.7477	44.6829	33.9763	50.1649	0.145664
540.74	32.756	41.0297	44.9398	20.6791	44.5832	33.8584	50.1475	0.143663
541.71	32.7653	41.0404	45.5993	20.6204	44.4953	33.7809	50.1044	0.140196
542.68	32.7747	41.0609	45.7442	20.5706	44.4334	33.7415	50.0411	0.136864
543.65	32.7839	41.0865	45.1451	20.5321	44.405	33.7326	49.9993	0.135434
544.62	32.7933	41.1172	43.8437	20.5065	44.4096	33.7475	50.0171	0.137062
545.59	32.8026	41.1529	42.1591	20.4929	44.4408	33.7805	50.0922	0.141691
546.56	32.8119	41.1932	40.5759	20.4897	44.4913	33.8222	50.1898	0.148019
547.53	32.8212	41.2379	39.56	20.4975	44.5543	33.858	50.2832	0.154093
548.5	32.8306	41.2871	39.3403	20.5166	44.6233	33.8773	50.3777	0.158251
549.47	32.8399	41.341	39.8118	20.5467	44.6886	33.8842	50.497	0.15992
550.44	32.8492	41.4004	40.6416	20.5868	44.7361	33.8944	50.657	0.159827
551.41	32.8585	41.4655	41.4697	20.6349	44.7497	33.9286	50.8514	0.159545
552.38	32.8678	41.5366	42.0549	20.6877	44.7174	34.0046	51.0521	0.160625
553.35	32.8772	41.614	42.3248	20.7434	44.6392	34.1305	51.2281	0.163828
554.32	32.8865	41.6975	42.3443	20.8041	44.5292	34.2966	51.3706	0.168846
555.29	32.8958	41.7871	42.2439	20.8733	44.4143	34.483	51.4998	0.174595
556.26	32.9051	41.8821	42.1472	20.9542	44.3246	34.6715	51.6456	0.179814
557.23	32.9145	41.9821	42.1267	21.049	44.2829	34.8453	51.8176	0.183562
558.2	32.9237	42.0866	42.1944	21.1577	44.2956	34.9909	51.9918	0.185379
559.17	32.9331	42.1945	42.3199	21.2772	44.3506	35.1061	52.1304	0.185161
560.14	32.9424	42.3051	42.4607	21.4031	44.4222	35.2	52.2221	0.183006
561.11	32.9517	42.4174	42.5863	21.5314	44.4806	35.286	52.2968	0.179218
562.08	32.961	42.531	42.6904	21.6596	44.5027	35.3813	52.3945	0.174441
563.05	32.9704	42.6458	42.7865	21.7868	44.4781	35.5021	52.5215	0.169684
564.02	32.9797	42.7616	42.8959	21.9165	44.4105	35.6534	52.6469	0.166073
564.99	32.989	42.8772	43.033	22.0541	44.3133	35.8274	52.7379	0.164369
565.96	32.9983	42.9925	43.1996	22.1995	44.2048	36.008	52.7928	0.164551
566.93	33.0076	43.1073	43.3852	22.3476	44.1039	36.1797	52.8422	0.165773
567.9	33.017	43.2214	43.5727	22.4943	44.0279	36.3345	52.9138	0.166796
568.87	33.0263	43.3343	43.745	22.6379	43.9905	36.4765	53.0014	0.166683
569.84	33.0356	43.4457	43.8897	22.7782	43.9999	36.6216	53.0722	0.165364
570.81	33.0449	43.5554	44.0008	22.9181	44.0562	36.7929	53.1054	0.163723
571.78	33.0543	43.663	44.079	23.0624	44.15	37.0084	53.1167	0.163128
572.75	33.0635	43.7681	44.1317	23.2116	44.2639	37.2659	53.1462	0.164622
573.72	33.0729	43.8704	44.1719	23.3611	44.3781	37.54	53.2212	0.168242
574.69	33.0822	43.9696	44.216	23.5053	44.477	37.7927	53.3262	0.172874
575.66	33.0915	44.0654	44.2779	23.6404	44.556	37.9898	53.417	0.176822
576.63	33.1008	44.1574	44.3635	23.7665	44.6217	38.1158	53.468	0.178832
577.6	33.1102	44.2453	44.4664	23.8874	44.6878	38.1846	53.4983	0.179007
578.57	33.1195	44.3288	44.5686	24.0089	44.7665	38.2356	53.5516	0.178984
579.54	33.1288	44.4075	44.6459	24.1378	44.8627	38.3137	53.6539	0.181165
580.51	33.1381	44.4812	44.6772	24.2781	44.9712	38.4484	53.7901	0.187342
581.48	33.1474	44.5494	44.6531	24.43	45.0804	38.6478	53.9189	0.197498
582.45	33.1568	44.6119	44.5808	24.5889	45.1796	38.6052	54.0135	0.209535
583.42	33.1661	44.6684	44.4818	24.7484	45.2642	38.6679	54.0837	0.220154
584.39	33.1754	44.7184	44.3858	24.904	45.3364	38.7287	54.1584	0.226422
585.36	33.1847	44.7617	44.3199	25.0548	45.4017	38.7876	54.2509	0.227172
586.33	33.194	44.7979	44.2994	25.2041	45.4644	38.8447	54.3428	0.223501
587.3	33.2034	44.8268	44.3227	25.3561	45.5253	38.9023	54.3993	0.218177
588.27	33.2127	44.8479	44.3733	25.5124	45.5841	38.6052	54.4038	0.214357
589.24	33.222	44.861	44.4269	25.6698	45.6413	38.6679	54.3749	0.214303
590.21	33.2313	44.8657	44.4626	25.8237	45.6988	38.7287	54.345	0.218649
591.18	33.2406	44.8617	44.4697	25.9714	45.7565	38.7876	54.345	0.226429
592.15	33.25	44.8486	44.4513	26.1145	45.8092	38.8447	54.3451	0.235692
593.12	33.2593	44.8262	44.419	26.2589	45.8464	38.9023	54.345	0.244351
594.09	33.2686	44.7941	44.3859	26.4126	45.8594	38.6679	54.345	0.250907
595.06	33.2779	44.752	44.3597	26.5796	45.8484	38.7287	54.345	0.254812
596.03	33.2872	44.6995	44.3398	26.7565	45.827	38.7876	54.3145	0.256397
597	33.2966	44.6363	44.3188	26.9333	45.8177	38.8447	54.345	0.256478
597.97	33.3059	44.5622	44.2867	27.1003	45.8415	38.9023	54.3405	0.255883
598.94	33.3152	44.4766	44.2667	27.2526	45.9079	38.9023	54.343	0.255157
599.91	33.3152	44.8126	44.2667	27.2526	46.0115	38.9025	54.342	0.254562
600.88	33.3059	44.9546	43.9776	27.118	46.1377	39.0385	54.341	0.254289
601.682	33.2967	45.0958	43.52	26.9458	46.2717	39.1236	54.336	0.254641
602.646	33.2876	45.236	42.9157	26.7553	46.4043	39.0678	54.1335	0.255994
603.61	33.2787	45.3755	42.2293	26.6029	46.5295	38.7728	53.6067	0.258524
604.574	33.2699	45.5141	41.6025	26.516	46.6373	38.2676	53.0856	0.261916
605.539	33.2612	45.6518	41.1501	26.4963	46.7097	37.6941	52.5701	0.265313
606.503	33.2527	45.7887	40.956	26.5207	46.7248	37.2695	52.0602	0.267618
607.467	33.2443	45.9247	41.0727	26.5511	46.6694	37.1915	51.5558	0.267993
608.431	33.2361	46.0599	41.5161	26.5513	46.5508	37.5376	51.0571	0.266233
609.396	33.228	46.1942	42.2516	26.5021	46.4007	38.2218	50.5639	0.262775
610.36	33.22	46.3277	43.1882	26.4081	46.2641	39.0369	50.0764	0.258338
611.324	33.2121	46.4603	44.1918	26.2918	52.3434	39.7542	49.5944	0.253477
612.288	33.2044	46.5921	45.1283	26.1781	53.6758	40.2214	49.118	0.248385
613.253	33.1968	46.723	45.9188	26.0787	55.0211	40.4151	48.6472	0.243058
614.217	33.1894	46.853	46.5809	25.9844	56.2749	40.4271	48.182	0.237681
615.181	33.1821	46.9822	47.2202	25.874	57.3535	40.3972	47.7225	0.232884
616.145	33.1749	47.1106	47.9635	25.7298	58.2244	40.4329	47.2684	0.229616
617.109	33.1679	47.2381	48.8689	25.551	58.9136	40.5521	46.82	0.228708
618.074	33.161	47.3647	49.8655	25.3529	59.4812	40.6732	46.3772	0.230434
619.038	33.1542	47.4905	50.7621	25.1573	59.9785	40.6449	45.94	0.234388
620.002	33.1476	47.6154	51.3249	24.9768	60.4171	40.3096	45.5083	0.239769
620.966	33.1411	47.7395	51.394	24.8053	60.7715	39.5752	45.0823	0.245831
621.931	33.1347	47.8627	50.9746	24.6218	61.018	38.4667	44.6618	0.252139
622.895	33.1285	47.9851	50.2435	24.4068	61.1774	37.13	44.247	0.258512
623.859	33.1224	48.1066	49.493	24.1597	61.3334	35.7917	43.8377	0.26475
624.823	33.1164	48.2273	49.0067	23.9052	61.5949	34.6757	43.434	0.270489
625.788	33.1106	48.3471	48.9567	23.6871	62.0369	33.9306	43.0359	0.275313
626.752	33.1049	48.4661	49.3559	23.55	62.6528	33.5975	42.6434	0.279031
627.716	33.0993	48.5842	50.0806	23.5207	63.3526	33.6338	42.2565	0.28183
628.68	33.0939	48.7015	50.9141	23.5965	63.996	33.9608	41.8752	0.284169
629.644	33.0886	48.8179	51.6223	23.7479	64.4434	34.5109	41.4995	0.286517
630.609	33.0835	48.9334	51.9956	23.9345	64.5874	35.2338	41.1294	0.289191
631.573	33.0784	49.0481	51.8715	24.1217	64.3599	36.0754	40.7648	0.292435
632.537	33.0736	49.162	51.1491	24.2935	63.7319	36.9586	40.4059	0.296607
633.501	33.0688	49.2749	49.8054	24.4532	62.7191	37.7932	40.0526	0.302208
634.466	33.0642	49.3871	47.9068	24.6161	61.393	38.5119	39.7048	0.309648
635.43	33.0597	49.4984	45.6013	24.7997	59.8836	39.1065	39.3626	0.318935
636.394	33.0554	49.6088	43.0872	25.0146	58.3591	39.6377	39.0261	0.329562
637.358	33.0512	49.7184	40.5664	25.2634	56.9853	40.2087	38.6951	0.340727
638.323	33.0471	49.8271	38.1993	25.5419	55.8817	40.9189	38.3697	0.351692
639.287	33.0431	49.935	36.0844	25.8416	55.1011	41.8197	38.0499	0.361963
640.251	33.0393	50.042	34.2644	26.1496	54.6412	42.8959	37.7357	0.371178
641.215	33.0357	50.1482	32.7413	26.4484	54.4734	44.0657	37.4271	0.378891
642.179	33.0321	50.2535	31.4824	26.7163	54.5616	45.1941	37.1241	0.384543
643.144	33.0287	50.358	30.4105	26.9315	54.8618	46.1127	36.8267	0.387757
644.108	33.0255	50.4616	29.3965	27.077	55.3072	46.6549	36.5348	0.388726
645.072	33.0223	50.5643	28.2779	27.148	55.8017	46.7086	36.2486	0.388369
646.036	33.0193	50.6662	26.9099	27.1552	56.2368	46.2679	35.9679	0.388088
647.001	33.0165	50.7673	25.2272	27.1242	56.5256	45.4533	35.6929	0.389253
647.965	33.0138	50.8675	23.2777	27.0897	56.6299	44.4805	35.4234	0.392702
648.929	33.0112	50.9668	21.2062	27.086	56.5683	43.5909	35.1595	0.398454
649.893	33.0087	51.0653	19.1906	27.1363	56.3963	42.9738	34.9013	0.405732
650.858	33.0064	51.163	17.3651	27.2458	56.1748	42.7189	34.6486	0.413271
651.822	33.0042	51.2597	15.7698	27.4008	55.9425	42.8163	34.4015	0.419847
652.786	33.0021	51.3557	14.3565	27.5749	55.7071	43.1915	34.16	0.42487
653.75	33.0002	51.4507	13.0457	27.7397	55.4526	43.744	33.9241	0.428714
654.715	32.9984	51.545	11.8016	27.8747	55.1532	44.3646	33.6938	0.432508
655.679	32.9968	51.6383	10.6888	27.9725	54.7836	44.9374	33.469	0.437497
656.643	32.9953	51.7309	9.89035	28.0359	54.3299	45.3461	33.2499	0.444483
657.607	32.9939	51.8225	9.67185	28.0732	53.8019	45.5013	33.0364	0.453897
658.572	32.9167	51.9186	10.2925	28.0924	53.2425	45.3773	32.8284	0.466364
659.536	32.8329	52.0154	11.888	28.0998	52.7238	45.0321	32.533	0.482849
660.5	32.7423	52.1141	14.3834	28.0996	52.3231	44.5864	32.2449	0.503448
661.464	32.6444	52.2146	17.4798	28.0956	52.0925	44.1733	31.9638	0.525097
662.428	32.5382	52.316	20.7214	28.0918	52.0346	43.8882	31.6892	0.540088
663.393	32.424	52.4152	23.6255	28.0919	52.0964	43.7634	31.4191	0.537729
664.357	32.3037	52.5088	25.8405	28.0993	52.1844	43.7779	31.1512	0.509687
665.321	32.1806	52.5948	27.258	28.1189	52.1924	43.877	30.8835	0.45654
666.285	32.0595	52.673	28.0057	28.1572	52.0389	43.9766	30.6151	0.390986
667.25	31.9447	52.7455	28.3351	28.2168	51.7253	44.0085	30.3469	0.334407
668.214	31.8396	52.8155	28.499	28.2906	51.3445	44.0001	30.0821	0.307543
669.178	31.7454	52.8866	28.6423	28.3662	51.0027	44.0256	29.8255	0.320325
670.142	31.6613	52.9623	28.7477	28.4283	50.7659	44.1295	29.5824	0.367038
671.106	31.5857	53.0454	28.6869	28.4627	50.6546	44.3359	29.3568	0.429818
672.071	31.5165	53.1378	28.3359	28.4643	50.6174	44.632	29.1504	0.488162
673.035	31.4533	53.2402	27.657	28.4444	50.5369	44.9048	28.9625	0.528478
673.999	31.3971	53.3516	26.7281	28.4237	50.3177	45.0014	28.79	0.548271
674.963	31.3511	53.4698	25.7041	28.4214	49.9432	44.8426	28.6299	0.553633
675.928	31.3191	53.5916	24.7262	28.4464	49.4661	44.4629	28.4802	0.553111
676.892	31.3049	53.7133	23.8502	28.4942	48.973	43.9896	28.3408	0.552552
677.856	31.3102	53.8311	23.0348	28.5496	48.5483	43.5922	28.214	0.553674
678.82	31.334	53.941	22.1871	28.5953	48.2463	43.418	28.1032	0.555833
679.785	31.3724	54.0396	21.2325	28.6222	48.0764	43.5337	28.0116	0.558464
680.749	31.4198	54.1236	20.1622	28.6354	48.0081	43.8999	27.9415	0.562086
681.713	31.4706	54.1907	19.0278	28.6517	47.9929	44.392	27.8939	0.567663
682.677	31.5218	54.2402	17.8981	28.6888	47.989	44.8535	27.8681	0.575547
683.641	31.5734	54.2728	16.8185	28.7548	47.9796	45.1544	27.8629	0.58517
684.606	31.6283	54.2905	15.8026	28.8409	47.9798	45.2336	27.8765	0.595585
685.57	31.6912	54.2956	14.8558	28.9257	48.0299	45.1151	27.9076	0.60611
686.534	31.7662	54.291	14.0092	28.9847	48.1801	44.8945	27.9552	0.616448
687.499	31.8562	54.2798	13.3316	29.0025	48.4702	44.7038	28.0193	0.626348
688.463	31.9617	54.2664	12.9074	28.981	48.9117	44.6653	28.1004	0.635381
689.427	32.082	54.2564	12.796	28.9385	49.4783	44.8458	28.1991	0.64321
690.391	32.2154	54.2556	12.9967	28.9032	50.1062	45.2243	28.3154	0.650101
691.355	32.3592	54.2685	13.4449	28.9013	50.7097	45.6927	28.4475	0.65714
692.32	32.51	54.2962	14.0444	28.9473	51.2041	46.0963	28.5913	0.665832
693.284	32.6633	54.3362	14.7161	29.039	51.5311	46.2994	28.741	0.677322
694.248	32.8141	54.3829	15.4367	29.1598	51.6735	46.2448	28.8901	0.691769
695.212	32.9578	54.43	16.2507	29.2858	51.6566	45.9789	29.0333	0.708263
696.177	33.0913	54.4727	17.2502	29.3952	51.5352	45.6311	29.1674	0.725256
697.141	33.2138	54.5097	18.5344	29.4748	51.3729	45.3556	29.2919	0.741176
698.105	33.327	54.542	20.1686	29.5249	51.2199	45.2663	29.4085	0.754919
699.069	33.4344	54.5731	22.1575	29.5565	51.1009	45.3991	29.5198	0.766068
700.034	33.5402	54.6065	24.4432	29.5876	51.0132	45.7116	29.6287	0.774876
700.998	33.6478	54.6452	26.9183	29.6348	50.9344	46.115	29.7376	0.78207
701.962	33.7593	54.6914	29.4476	29.7062	50.8378	46.511	29.8485	0.788564
702.926	33.8745	54.7453	31.8941	29.7978	50.7079	46.8219	29.9622	0.795182
703.89	33.9918	54.806	34.1417	29.895	50.5474	47.0037	30.079	0.8025
704.855	34.1085	54.8705	36.1135	29.9799	50.374	47.0455	30.1979	0.81083
705.819	34.2219	54.9348	37.7831	30.0403	50.206	46.9656	30.3174	0.820242
706.783	34.3305	54.9949	39.1767	30.0756	50.0478	46.8075	30.4361	0.830512
707.747	34.4342	55.0482	40.3599	30.0966	49.8843	46.6322	30.5535	0.84104
708.712	34.5346	55.0947	41.4139	30.1179	49.6886	46.5074	30.67	0.850932
709.676	34.6346	55.1377	42.4091	30.1498	49.4413	46.4898	30.7872	0.859386
710.64	34.7374	55.1821	43.3817	30.1938	49.1454	46.6052	30.9073	0.866232
711.604	34.8455	55.2333	44.3263	30.2442	48.8285	46.8368	31.032	0.872128
712.568	34.9604	55.2947	45.2045	30.2954	48.5292	47.1296	31.1631	0.878055
713.533	35.0818	55.3671	45.8533	30.3455	48.2511	47.3527	31.3014	0.884257
714.497	35.2082	55.4481	46.3774	30.4003	48.0402	47.5143	31.4472	0.889412
715.461	35.3368	55.5332	46.787	30.4631	47.8978	47.5906	31.6	0.890888
716.426	35.4653	55.6183	47.1237	30.531	47.8228	47.5953	31.7585	0.886275
717.39	35.5917	55.7006	47.4449	30.5948	47.821	47.5645	31.9206	0.875352
718.354	35.7152	55.7805	47.9134	30.6479	47.9283	47.5904	32.0839	0.861093
719.318	35.8368	55.8605	48.4077	30.6909	48.1082	47.6161	32.2465	0.8488
720.282	35.9582	55.944	48.8952	30.7386	48.3323	47.6287	32.4074	0.843665
721.247	36.0818	56.0334	49.317	30.8111	48.5562	47.6141	32.5661	0.848175
722.211	36.2096	56.1288	49.6112	30.9214	48.7409	47.575	32.7225	0.860928
723.175	36.3425	56.2279	49.7366	31.0653	48.8763	47.5412	32.8765	0.877517
724.139	36.4797	56.3267	49.688	31.2211	48.9935	47.5603	33.028	0.892826
725.104	36.6191	56.4214	49.4971	31.3594	49.1524	47.6711	33.1766	0.903329
726.068	36.758	56.5098	49.2176	31.46	49.4094	47.8792	33.3228	0.908208
727.032	36.8949	56.5924	48.9047	31.5233	49.7839	48.1474	33.468	0.908974
727.996	37.0293	56.6719	48.5999	31.569	50.2452	48.4121	33.614	0.908163
728.961	37.1622	56.7513	48.3251	31.6269	50.7273	48.6101	33.7625	0.907995
729.925	37.2953	56.8332	48.0855	31.7221	51.1604	48.7035	33.9141	0.909578
730.889	37.4296	56.918	47.8758	31.8656	51.501	48.6857	34.0688	0.912832
731.853	37.5648	57.0043	47.6853	32.052	51.7455	48.5705	34.225	0.916924
732.817	37.6995	57.089	47.498	32.2655	51.9222	48.3745	34.3813	0.920905
733.782	37.8318	57.1695	47.294	32.4896	52.0688	48.1071	34.5371	0.92425
734.746	37.9609	57.2445	47.0511	32.7145	52.2135	47.7811	34.6924	0.927054
735.71	38.0867	57.3142	46.7541	32.9389	52.3701	47.4307	34.8481	0.929775
736.674	38.21	57.38	46.4019	33.1678	52.5448	47.1236	35.0052	0.932704
737.639	38.3316	57.4436	46.0081	33.4065	52.7466	46.9485	35.1636	0.935545
738.603	38.4517	57.5059	45.5927	33.6561	52.9879	46.9806	35.3222	0.937472
739.567	38.5696	57.567	45.1668	33.912	53.2758	47.2428	35.4791	0.937713
740.531	38.6843	57.6266	44.7208	34.1656	53.6029	47.6863	35.6327	0.936212
741.495	38.7948	57.6844	44.2234	34.4075	53.9471	48.2085	35.7819	0.933827
742.46	38.9009	57.7408	43.63	34.6317	54.2835	48.6983	35.9267	0.931803
743.424	39.003	57.7963	42.8916	34.8361	54.5992	49.0823	36.068	0.930896
744.388	39.1017	57.8522	41.9561	35.0216	54.8972	49.3457	36.2069	0.93086
745.352	39.1977	57.9094	40.7621	35.1893	55.1863	49.517	36.3442	0.930757
746.317	39.2914	57.9688	39.2356	35.3387	55.4631	49.6326	36.4812	0.929887
747.281	39.3835	58.0312	37.3005	35.4661	55.7037	49.7056	36.6192	0.928553
748.245	39.4759	58.0974	34.9057	35.5663	55.8745	49.7218	36.7604	0.927982
749.209	39.571	58.1682	32.0566	35.6343	55.9568	49.663	36.9067	0.929385
750.174	39.6718	58.2437	28.8339	35.6686	55.9638	49.5353	37.0591	0.932902
751.138	39.7801	58.3231	25.3929	35.6727	55.9386	49.3807	37.2165	0.937303
752.102	39.8956	58.4045	21.9469	35.6546	55.9293	49.2613	37.3756	0.940747
753.066	40.016	58.4853	18.744	35.6241	55.9584	49.227	37.5319	0.942029
754.031	40.137	58.5625	16.0474	35.5893	56.0091	49.2889	37.6812	0.941378
754.995	40.2543	58.6344	14.1163	35.5532	56.038	49.4177	37.8208	0.940177
755.959	40.3648	58.7007	13.1792	35.5129	56.0052	49.5641	37.951	0.939902
756.923	40.4675	58.7631	13.3956	35.4631	55.9001	49.6893	38.0741	0.941089
757.888	40.5632	58.8246	14.8132	35.4001	55.7443	49.7835	38.1937	0.943125
758.852	40.6544	58.8883	17.3398	35.3254	55.5767	49.864	38.3127	0.944889
759.816	40.7435	58.9561	20.7487	35.246	55.4284	49.9596	38.433	0.945666
760.78	40.8328	59.0284	24.7233	35.1704	55.3094	50.0892	38.5548	0.945584
761.744	40.9235	59.1037	28.9267	35.1043	55.2097	50.2516	38.677	0.945331
762.709	41.0162	59.1797	33.0662	35.0468	55.1108	50.4279	38.7983	0.945505
763.673	41.1108	59.2542	36.9299	34.9924	54.9948	50.5951	38.9176	0.946161
764.637	41.2069	59.3258	40.3899	34.9338	54.8471	50.7389	39.0349	0.946874
765.601	41.3039	59.3947	43.3811	34.8663	54.6529	50.8621	39.1504	0.947135
766.566	41.401	59.4616	45.8736	34.7891	54.3969	50.9809	39.2649	0.946704
767.53	41.4972	59.5275	47.8545	34.7035	54.0671	51.1135	39.3786	0.945668
768.494	41.5917	59.593	49.325	34.6106	53.6598	51.266	39.4914	0.944285
769.458	41.6837	59.6582	50.3047	34.51	53.1823	51.4241	39.6025	0.942839
770.423	41.7731	59.7231	50.8361	34.4008	52.6471	51.5578	39.7113	0.941614
771.387	41.86	59.7879	50.9824	34.2847	52.0649	51.6375	39.8175	0.9409
772.351	41.9457	59.8522	50.818	34.1675	51.4397	51.651	39.9213	0.940911
773.315	42.0316	59.9166	50.4145	34.0582	50.7704	51.6114	40.0229	0.941661
774.279	42.1191	59.9811	49.8249	33.966	50.0578	51.5464	40.1223	0.94297
775.244	42.2093	60.0452	49.0707	33.8952	49.3137	51.4771	40.2189	0.944684
776.208	42.3023	60.108	48.1385	33.8429	48.5695	51.399	40.3116	0.946944
777.172	42.3976	60.1686	46.9943	33.7989	47.8798	51.283	40.3999	0.95016
778.136	42.4942	60.2261	45.6164	33.751	47.322	51.0977	40.4844	0.95458
779.101	42.5913	60.2803	44.0335	33.6894	46.9871	50.8405	40.5669	0.959679
780.065	42.689	60.3317	42.3531	33.6129	46.9641	50.5553	40.65	0.963947
781.029	42.788	60.3817	40.7625	33.5297	47.3169	50.3235	40.7364	0.965397
781.993	42.8899	60.432	39.498	33.4537	48.0626	50.2268	40.828	0.962643
782.958	42.996	60.4844	38.7897	33.398	49.1579	50.3038	40.925	0.955846
783.922	43.108	60.5402	38.8013	33.3685	50.5048	50.5249	41.0268	0.946859
784.886	43.2268	60.6003	39.5885	33.361	51.9744	50.8031	41.1324	0.93837
785.85	43.3529	60.665	41.0887	33.3639	53.44	51.0348	41.2407	0.932539
786.814	43.4862	60.7337	43.14	33.3639	54.806	51.1452	41.3508	0.92995
787.779	43.6257	60.8054	45.5207	33.3528	56.0216	51.1159	41.4624	0.929449
788.743	43.7701	60.8782	47.9935	33.3302	57.0754	50.9825	41.5752	0.928911
789.707	43.9181	60.9502	50.3445	33.3034	57.9784	50.8066	41.6893	0.926388
790.671	44.0682	61.0202	52.4085	33.282	58.7418	50.6425	41.8049	0.921027
791.636	44.2203	61.0872	54.0827	33.2745	59.3665	50.5187	41.9231	0.913312
792.6	44.375	61.1518	55.3328	33.2843	59.8447	50.4395	42.0459	0.90464
793.564	44.5337	61.2154	56.1907	33.3107	60.1736	50.4009	42.1754	0.896537
794.528	44.6981	61.2801	56.7418	33.3496	60.3698	50.4009	42.3137	0.889914
795.493	44.8698	61.3481	57.0979	33.3961	60.4744	50.4397	42.4618	0.884713
796.457	45.0498	61.4211	57.3594	33.4448	60.5436	50.511	42.6195	0.88007
797.421	45.2386	61.4998	57.5801	33.4907	60.6301	50.5951	42.785	0.874909
798.385	45.436	61.5839	57.7493	33.5296	60.761	50.6632	42.9556	0.868638
799.35	45.6412	61.6718	57.8064	33.5583	60.929	50.6946	43.129	0.861564
800.314	45.8536	61.7619	57.6839	33.577	61.1024	50.6923	43.3035	0.854756
801.278	46.0723	61.8531	57.3597	33.5892	61.2488	50.6861	43.4793	0.849406
802.242	46.2976	61.9456	56.8892	33.6031	61.3585	50.7159	43.6578	0.846083
803.207	46.5302	62.0411	56.3965	33.6286	61.4524	50.8061	43.8417	0.844374
804.171	46.7719	62.1418	56.0252	33.6743	61.5687	50.9423	44.0333	0.843199
805.135	47.0244	62.2494	55.8709	33.7418	61.7372	51.0688	44.2345	0.841599
806.099	47.2893	62.3637	55.9333	33.8233	61.9591	51.1099	44.4458	0.839459
807.063	47.5673	62.4828	56.1191	33.9026	62.2069	51.0052	44.6663	0.83761
808.028	47.8579	62.603	56.2972	33.9611	62.4455	50.7436	44.8943	0.837165
808.992	48.1604	62.7209	56.3738	33.9867	62.6604	50.376	45.1273	0.838517
809.956	48.4741	62.8342	56.3447	33.9805	62.8714	50.0013	45.3633	0.84074
810.92	48.7992	62.9428	56.2966	33.9579	63.1234	49.7302	45.6009	0.841888
811.885	49.1366	63.0486	56.3537	33.9422	63.4565	49.6395	45.8405	0.840103
812.849	49.4879	63.1544	56.603	33.9554	63.8756	49.7377	46.0836	0.83484
813.813	49.8536	63.2628	57.0386	34.0089	64.3394	49.9606	46.3335	0.827357
814.777	50.233	63.3759	57.566	34.1003	64.7792	50.2007	46.5934	0.820118
815.741	50.6225	63.4944	58.0591	34.2152	65.1364	50.3597	46.8659	0.815445
816.706	51.0164	63.6183	58.4334	34.3347	65.3951	50.3933	47.1522	0.814281
817.67	51.4075	63.7467	58.6908	34.4423	65.5907	50.3312	47.4513	0.815818
818.634	51.7894	63.8787	58.9141	34.5277	65.7909	50.2576	47.7609	0.818152
819.598	52.1576	64.0136	59.2124	34.5888	66.0604	50.2654	48.0785	0.819471
820.563	52.511	64.1511	59.6489	34.6299	66.4278	50.4055	48.4023	0.818999
821.527	52.8522	64.2913	60.199	34.6587	66.8778	50.6606	48.7321	0.817189
822.491	53.1858	64.4351	60.7606	34.6833	67.3683	50.9577	49.0695	0.815194
823.455	53.5173	64.5832	61.2124	34.7094	67.8619	51.209	49.4164	0.814061
824.42	53.8513	64.7363	61.4798	34.7383	68.3492	51.357	49.7748	0.814157
825.384	54.1905	64.8941	61.5763	34.7671	68.8534	51.4016	50.1453	0.815071
826.348	54.5365	65.0555	61.5965	34.7901	69.4139	51.3956	50.5277	0.81592
827.312	54.8899	65.2187	61.6683	34.8018	70.0584	51.4148	50.9215	0.815845
828.277	55.2518	65.3817	61.8922	34.7997	70.7816	51.5192	51.3266	0.814455
829.241	55.6239	65.5429	62.3008	34.7861	71.5444	51.7261	51.744	0.812047
830.205	56.0085	65.7017	62.8603	34.7674	72.2925	52.0106	52.175	0.809511
831.169	56.4075	65.8585	63.5053	34.7511	72.9886	52.3272	52.6209	0.807916
832.134	56.8222	66.0139	64.1849	34.7428	73.6362	52.6394	53.0816	0.807925
833.098	57.2525	66.168	64.8888	34.7445	74.2815	52.9371	53.5558	0.809376
834.062	57.698	66.3201	65.6449	34.755	74.9912	53.2332	54.0414	0.811298
835.026	58.1578	66.4686	66.4901	34.7717	75.815	53.5438	54.536	0.812439
835.99	58.6313	66.6114	67.4351	34.7938	76.7545	53.8665	55.0377	0.811998
836.955	59.1185	66.7472	68.4423	34.8232	77.7553	54.1731	55.5452	0.81011
837.919	59.6202	66.8762	69.4297	34.8624	78.7285	54.4203	56.058	0.807737
838.883	60.1371	67.0007	70.2961	34.9119	79.5905	54.5731	56.5765	0.806088
839.847	60.6705	67.1247	70.9529	34.9672	80.2957	54.6225	57.1019	0.80595
840.812	61.221	67.2522	71.3507	35.0192	80.8488	54.5913	57.636	0.807387
841.776	61.7891	67.3863	71.49	35.0588	81.2953	54.5261	58.1812	0.809905
842.74	62.3744	67.5279	71.412	35.0814	81.6974	54.4813	58.739	0.812836
843.704	62.9752	67.6754	71.1685	35.0909	82.1137	54.5059	59.3093	0.815611
844.668	63.5892	67.8257	70.7852	35.0977	82.5891	54.633	59.8897	0.817761
845.633	64.2128	67.9751	70.2356	35.1123	83.1538	54.8745	60.4763	0.818817
846.597	64.8422	68.1211	69.4467	35.1395	83.8216	55.218	61.0643	0.818333
847.561	65.4734	68.2627	68.3478	35.175	84.5834	55.6257	61.6494	0.816121
848.525	66.103	68.4011	66.9468	35.2071	85.3979	56.0393	62.2286	0.812522
849.49	66.7285	68.5383	65.3927	35.2233	86.1907	56.3903	62.8004	0.808468
850.454	67.3477	68.6766	63.9763	35.2159	86.8705	56.6143	63.3642	0.805211
851.418	67.9589	68.8176	63.0515	35.1842	87.3585	56.6666	63.9198	0.803879
852.382	68.5602	68.962	62.9042	35.1336	87.6209	56.5339	64.4666	0.805067
853.347	69.1495	69.1094	63.6347	35.072	87.686	56.2437	65.0034	0.808637
854.311	69.7248	69.259	65.1168	35.0069	87.6415	55.8636	65.5295	0.813732
855.275	70.2841	69.4097	67.051	34.9445	87.6068	55.4915	66.0443	0.818975
856.239	70.8262	69.5609	69.0832	34.8901	87.695	55.2307	66.5481	0.822819
857.204	71.3505	69.7124	70.9211	34.8484	87.9767	55.157	67.0414	0.824047
858.168	71.8567	69.864	72.3889	34.8231	88.4591	55.2878	67.5249	0.822294
859.132	72.3444	70.0152	73.4097	34.8161	89.0886	55.5719	67.9985	0.81831
860.096	72.8131	70.1653	73.9524	34.8267	89.7752	55.9083	68.4614	0.813752
861.061	73.2626	70.3134	73.9952	34.8512	90.4278	56.1887	68.9126	0.810465
862.025	73.6928	70.4594	73.535	34.8841	90.9852	56.3413	69.3509	0.80963
862.989	74.1041	70.6038	72.6308	34.9179	91.4325	56.3558	69.7756	0.81125
863.953	74.4977	70.748	71.4429	34.946	91.7959	56.2798	70.1864	0.814254
864.917	74.8739	70.8933	70.2302	34.9622	92.1257	56.1926	70.5834	0.817115
865.882	75.2324	71.0405	69.2916	34.964	92.4762	56.1726	70.9663	0.818548
866.846	75.5717	71.189	68.8701	34.9513	92.891	56.272	71.3344	0.817911
867.81	75.89	71.3378	69.067	34.9263	93.3944	56.505	71.6868	0.815223
868.774	76.1864	71.4859	69.8039	34.8924	93.9861	56.8441	72.023	0.811003
869.739	76.4616	71.6335	70.8541	34.8529	94.633	57.2231	72.3437	0.806148
870.703	76.7187	71.782	71.9257	34.8117	95.2669	57.5493	72.6512	0.801858
871.667	76.9619	71.9333	72.7627	34.7734	95.7964	57.7294	72.9487	0.799436
872.631	77.196	72.0892	73.2211	34.7441	96.1374	57.7065	73.2398	0.799849
873.596	77.4246	72.2497	73.2896	34.7289	96.2509	57.4892	73.5272	0.803194
874.56	77.6498	72.4138	73.0588	34.7293	96.1683	57.1564	73.8116	0.808444
875.524	77.8719	72.5794	72.659	34.7415	95.9851	56.8287	74.0915	0.813762
876.488	78.0894	72.7443	72.1994	34.7591	95.8217	56.6153	74.3636	0.817325
877.452	78.2998	72.9067	71.7341	34.7771	95.7643	56.5624	74.6234	0.818227
878.417	78.4996	73.0658	71.2631	34.7968	95.8196	56.6326	74.8665	0.816928
879.381	78.6846	73.2209	70.7587	34.8252	95.9124	56.7292	75.0893	0.814964
880.345	78.8503	73.3717	70.1974	34.8713	95.9286	56.7533	75.2895	0.814078
881.309	78.9923	73.5178	69.5803	34.938	95.7806	56.66	75.4658	0.815277
882.274	79.1068	73.6593	68.9361	35.0196	95.4578	56.4828	75.6173	0.818353
883.238	79.1903	73.7965	68.3098	35.1031	95.0336	56.3143	75.7433	0.822117
884.202	79.2407	73.9302	67.7446	35.1757	94.6244	56.2524	75.8425	0.825191
885.166	79.2569	74.0613	67.2673	35.2334	94.323	56.3434	75.9134	0.826876
886.131	79.2388	74.1906	66.8858	35.2829	94.1459	56.5564	75.9547	0.827581
887.095	79.1875	74.3186	66.598	35.3374	94.0288	56.8051	75.9652	0.828577
888.059	79.1043	74.4449	66.4053	35.4091	93.8695	57.004	75.9446	0.831201
889.023	78.9904	74.5682	66.3219	35.5017	93.589	57.123	75.8928	0.836046
889.987	78.8467	74.6868	66.3715	35.6097	93.1737	57.2094	75.8095	0.842621
890.952	78.6735	74.7993	66.5747	35.7231	92.6744	57.3629	75.6945	0.849709
891.916	78.4711	74.9045	66.9333	35.8355	92.1668	57.6801	75.5473	0.856159
892.88	78.24	75.0028	67.4215	35.9482	91.7017	58.1987	75.368	0.861573
893.844	77.9814	75.0954	67.991	36.0714	91.2753	58.8747	75.1573	0.866448
894.809	77.6967	75.1844	68.5853	36.2188	90.8381	59.6041	74.9165	0.871759
895.773	77.387	75.2716	69.1542	36.4009	90.3282	60.27	74.6471	0.878339
896.737	77.0521	75.3575	69.6607	36.6197	89.7076	60.7908	74.3499	0.886536
897.701	76.6911	75.4413	70.0815	36.8668	88.9799	61.1436	74.0246	0.896305
898.666	76.3014	75.5212	70.4041	37.1261	88.1873	61.3582	73.6698	0.907522
899.63	75.8806	75.5948	70.6278	37.3802	87.3927	61.4928	73.2839	0.920155
900.594	75.4269	75.6603	70.7669	37.6163	86.6615	61.6048	72.8658	0.934094
901.558	74.9397	75.7169	70.8526	37.8292	86.0487	61.7321	72.4159	0.948844
902.523	74.4205	75.7651	70.9253	38.0207	85.592	61.8845	71.936	0.963404
903.487	73.8728	75.8057	71.0197	38.1957	85.3063	62.0475	71.429	0.976563
904.451	73.3014	75.8401	71.15	38.3567	85.18	62.191	70.8987	0.987448
905.415	72.7118	75.8698	71.3033	38.5016	85.1763	62.285	70.3485	0.995948
906.38	72.1089	75.8962	71.4477	38.6245	85.2442	62.3165	69.7812	1.00271
907.344	71.4957	75.9206	71.5509	38.7195	85.3333	62.3023	69.1984	1.00871
908.308	70.8728	75.9439	71.5961	38.7859	85.4085	62.2889	68.6001	1.01472
909.272	70.2384	75.9662	71.5876	38.8298	85.4553	62.3363	67.9848	1.02093
910.236	69.5886	75.9856	71.5439	38.864	85.4736	62.492	67.35	1.02705
911.201	68.919	75.9985	71.4828	38.9029	85.4657	62.7666	66.6921	1.03259
912.165	68.2259	75.9998	71.4093	38.9571	85.4262	63.1243	66.0077	1.03725
913.129	67.5073	75.9847	71.312	39.0294	85.3407	63.4963	65.2943	1.04107
914.093	66.7629	75.9501	71.1705	39.1136	85.1949	63.8088	64.5512	1.0444
915.058	65.9948	75.8959	70.9661	39.1975	84.9865	64.0147	63.7798	1.04763
916.022	65.2064	75.8253	70.6923	39.2677	84.7326	64.1085	62.9841	1.05089
916.986	64.4023	75.7434	70.3569	39.3152	84.4638	64.1199	62.1696	1.05392
917.95	63.5869	75.6557	69.9784	39.3383	84.2092	64.0887	61.3424	1.05618
918.914	62.7643	75.5657	69.5758	39.3426	83.977	64.0374	60.5081	1.05716
919.879	61.9375	75.4748	69.159	39.3377	83.7442	63.9575	59.6702	1.05678
920.843	61.1084	75.3824	68.7198	39.3323	83.4625	63.8169	58.8308	1.05541
921.807	60.278	75.2875	68.2283	39.331	83.0765	63.584	57.9907	1.05365
922.771	59.4467	75.1901	67.6347	39.334	82.5476	63.2478	57.1503	1.05185
923.736	58.615	75.092	66.8782	39.3378	81.8664	62.8251	56.3113	1.04987
924.7	57.7839	74.9964	65.9013	39.3383	81.0506	62.3451	55.4758	1.0471
925.664	56.9543	74.9071	64.6678	39.3329	80.13	61.8291	54.6472	1.0429
926.628	56.1272	74.8273	63.1773	39.3214	79.1293	61.2776	53.8293	1.03698
927.593	55.3031	74.759	61.4664	39.3061	78.0551	60.6762	53.0257	1.02942
928.557	54.4823	74.7024	59.5924	39.2921	76.894	60.0136	52.2396	1.02052
929.521	53.6645	74.6565	57.6039	39.287	75.614	59.2963	51.4738	1.01063
930.485	52.8495	74.6196	55.5127	39.3001	74.1716	58.5496	50.7295	1.00019
931.449	52.0384	74.5894	53.2874	39.3415	72.5225	57.8026	50.0068	0.990038
932.414	51.234	74.5641	50.8768	39.4198	70.6407	57.0746	49.3041	0.981417
933.378	50.4412	74.5424	48.2542	39.5391	68.5397	56.3708	48.6192	0.975575
934.342	49.6671	74.5241	45.4557	39.6976	66.2875	55.6925	47.9501	0.973047
935.307	48.9199	74.5096	42.5889	39.8858	64.0023	55.0472	47.2965	0.973145
936.271	48.2072	74.5006	39.8045	40.0885	61.8254	54.4507	46.6601	0.974159
937.235	47.5347	74.4984	37.2447	40.2873	59.883	53.9158	46.0447	0.974247
938.199	46.9055	74.5041	34.9948	40.466	58.2488	53.4395	45.454	0.972478
939.163	46.3195	74.5183	33.0665	40.6145	56.9295	53.0011	44.891	0.969347
940.128	45.7749	74.5405	31.4167	40.7318	55.8743	52.578	44.3563	0.966452
941.092	45.2692	74.5699	29.9856	40.8259	55.0031	52.1641	43.8486	0.9656
942.056	44.8	74.6057	28.728	40.9102	54.2339	51.777	43.3657	0.967924
943.02	44.3658	74.6477	27.6196	40.9988	53.5041	51.4447	42.9054	0.973431
943.985	43.9656	74.696	26.6427	41.1024	52.7779	51.1816	42.467	0.981066
944.949	43.5981	74.7507	25.7642	41.2275	52.0459	50.9694	42.0509	0.989067
945.913	43.2612	74.8118	24.9269	41.3779	51.3192	50.7593	41.6582	0.99544
946.877	42.9521	74.8792	24.0642	41.5577	50.6213	50.493	41.2896	0.998496
947.841	42.6678	74.9522	23.1313	41.7739	49.9783	50.1297	40.9453	0.997415
948.806	42.4053	75.031	22.1333	42.0363	49.4091	49.6632	40.6248	0.992654
949.77	42.1628	75.1167	21.1299	42.3557	48.9197	49.119	40.3275	0.985923
950.734	41.9392	75.2112	20.2121	42.7426	48.5044	48.5414	40.0534	0.979574
951.698	41.7337	75.317	19.4658	43.2067	48.1549	47.9821	39.8024	0.975661
952.663	41.5453	75.4359	18.9446	43.7587	47.8719	47.4993	39.5746	0.975218
953.627	41.3717	75.5682	18.6645	44.413	47.6728	47.1615	39.3692	0.978205
954.591	41.2101	75.7123	18.6167	45.1907	47.5872	47.0459	39.185	0.984101
955.555	41.0566	75.865	18.7808	46.1203	47.6448	47.2225	39.0201	0.992606
956.52	40.9076	76.0228	19.1213	47.2358	47.855	47.7253	38.8728	1.00386
957.484	40.7605	76.1826	19.5733	48.5733	48.1946	48.5251	38.7416	1.01796
958.448	40.6138	76.3431	20.0308	50.1632	48.6078	49.5221	38.6252	1.03417
959.412	40.4675	76.5048	20.3638	52.0228	49.0196	50.563	38.5221	1.05059
960.376	40.3226	76.6696	20.4638	54.1472	49.3567	51.4804	38.4308	1.06466
961.341	40.1804	76.8403	20.2986	56.504	49.5697	52.1397	38.3501	1.07439
962.305	40.0423	77.0193	19.9458	59.0344	49.6454	52.4761	38.2794	1.07948
963.269	39.9095	77.2085	19.5728	61.6596	49.6076	52.5103	38.2195	1.08174
964.234	39.7829	77.4087	19.3773	64.2917	49.5072	52.339	38.1723	1.08442
965.198	39.6635	77.6197	19.5164	66.8418	49.4093	52.1061	38.1403	1.09089
966.162	39.5523	77.8403	20.068	69.2225	49.3823	51.9683	38.1258	1.10341
967.126	39.4502	78.0684	21.035	71.3466	49.4931	52.0628	38.1298	1.12251
968.09	39.3584	78.3017	22.3813	73.127	49.8029	52.4877	38.1527	1.14712
969.055	39.2776	78.538	24.0704	74.4849	50.3629	53.2931	38.194	1.17534
970.019	39.2084	78.7754	26.0801	75.3632	51.2038	54.4826	38.2536	1.20525
970.983	39.1513	79.0138	28.386	75.7397	52.3215	56.0155	38.3319	1.23558
971.947	39.1069	79.2537	30.9311	75.6321	53.6662	57.8113	38.4297	1.26605
972.912	39.0757	79.4971	33.6122	75.0906	55.1446	59.7575	38.5478	1.29735
973.876	39.0579	79.7458	36.2943	74.1852	56.64	61.7273	38.6862	1.33057
974.84	39.0537	80.0014	38.8491	72.9925	58.0448	63.6069	38.8443	1.36652
975.804	39.063	80.2644	41.1929	71.5905	59.2912	65.3221	39.0211	1.40492
976.769	39.0853	80.5348	43.3032	70.0591	60.365	66.851	39.2158	1.44416
977.733	39.1208	80.812	45.2062	68.4805	61.2974	68.2162	39.4282	1.48172
978.697	39.1696	81.095	46.9432	66.9355	62.1373	69.4578	39.6588	1.51523
979.661	39.2317	81.383	48.5354	65.4962	62.9213	70.6024	39.9082	1.54351
980.625	39.307	81.6746	49.9695	64.218	63.6531	71.6474	40.1762	1.56708
981.59	39.395	81.9683	51.2067	63.1373	64.3061	72.5669	40.4617	1.58763
982.554	39.495	82.2621	52.2115	62.2726	64.8396	73.3345	40.7628	1.60698
983.518	39.6058	82.5545	52.9772	61.6287	65.2209	73.9473	41.077	1.62604
984.482	39.7262	82.8439	53.5342	61.197	65.4411	74.434	41.4024	1.64452
985.447	39.8552	83.1299	53.9361	60.9546	65.5172	74.8449	41.7374	1.66145
986.411	39.9913	83.4126	54.2326	60.8631	65.4845	75.2299	42.0813	1.67601
987.375	40.1329	83.6924	54.4469	60.8706	65.3834	75.6176	42.4335	1.68809
988.339	40.2781	83.9699	54.5712	60.9196	65.2485	76.0073	42.7934	1.69826
989.303	40.4247	84.2451	54.5841	60.9552	65.1029	76.3751	43.1597	1.7072
990.268	40.5701	84.5173	54.4755	60.9327	64.957	76.6864	43.5302	1.71522
991.232	40.7114	84.7853	54.2649	60.8216	64.8111	76.9097	43.9021	1.72224
992.196	40.8457	85.0476	54.0012	60.6032	64.659	77.0249	44.2717	1.72814
993.16	40.9699	85.3031	53.7452	60.2668	64.4912	77.0294	44.6351	1.73333
994.125	41.0821	85.5519	53.5455	59.8066	64.2983	76.9414	44.9887	1.7388
995.089	41.1808	85.7947	53.4227	59.2218	64.074	76.7993	45.3294	1.74573
996.053	41.2661	86.0332	53.368	58.5194	63.8169	76.6544	45.6557	1.75478
997.017	41.3388	86.2684	53.3541	57.717	63.5317	76.5566	45.9669	1.76557
997.982	41.4004	86.5007	53.3494	56.8445	63.2285	76.5354	46.2636	1.77675
998.946	41.4522	86.7289	53.3291	55.9421	62.9213	76.5893	46.5463	1.78664
999.91	41.4951	86.9506	53.2801	55.054	62.6245	76.6874	46.8152	1.79404
1000.87	41.5295	87.163	53.2011	54.221	62.3509	76.7887	47.0701	1.79866
1001.84	41.5555	87.3632	53.1024	53.4734	62.1078	76.8643	47.31	1.80098
1002.8	41.5729	87.5492	53.0038	52.8264	61.8973	76.9137	47.5334	1.80168
1003.77	41.5814	87.7194	52.929	52.2799	61.7141	76.9604	47.7388	1.80112
1004.73	41.581	87.8729	52.8927	51.8228	61.5466	77.0302	47.9251	1.79931
1005.7	41.5714	88.0096	52.8879	51.4389	61.3779	77.1264	48.0915	1.7963
1006.66	41.5528	88.1294	52.8774	51.1125	61.1877	77.2181	48.238	1.79277
1007.62	41.5249	88.2329	52.8049	50.8322	60.9591	77.252	48.3653	1.79003
1008.59	41.4879	88.3209	52.621	50.5912	60.6859	77.1826	48.4745	1.78947
1009.55	41.4416	88.394	52.3146	50.3861	60.3796	77.0032	48.5661	1.79158
1010.52	41.3854	88.4528	51.9305	50.215	60.0718	76.7582	48.6403	1.79527
1011.48	41.3187	88.4972	51.5594	50.0769	59.8064	76.5293	48.6955	1.79809
1012.45	41.2401	88.5266	51.3006	49.9714	59.6268	76.4005	48.7295	1.79726
1013.41	41.1486	88.5395	51.2151	49.8993	59.5581	76.4212	48.7396	1.79106
1014.37	41.0433	88.5343	51.2919	49.8623	59.5954	76.5846	48.7237	1.77985
1015.34	40.924	88.5091	51.4499	49.8612	59.7045	76.8334	48.6809	1.7659
1016.3	40.7918	88.4624	51.5734	49.895	59.8364	77.0871	48.6124	1.75235
1017.27	40.6487	88.3934	51.5621	49.9592	59.9475	77.276	48.5204	1.74173
1018.23	40.4968	88.3025	51.369	50.0471	60.0162	77.3638	48.4078	1.73493
1019.19	40.3377	88.1906	51.0076	50.151	60.048	77.3508	48.2771	1.73118
1020.16	40.1715	88.0599	50.5284	50.2657	60.0648	77.2597	48.1301	1.72885
1021.12	39.9964	87.9128	49.98	50.3892	60.0902	77.1159	47.9671	1.72671
1022.09	39.8092	87.7512	49.3778	50.5232	60.1373	76.9344	47.7877	1.72458
1023.05	39.6065	87.5765	48.6944	50.6709	60.2084	76.7236	47.5907	1.72313
1024.02	39.3859	87.3885	47.8768	50.8336	60.3049	76.4981	47.3743	1.72298
1024.98	39.147	87.1856	46.8788	51.0089	60.4355	76.2901	47.137	1.72378
1025.94	38.8916	86.9661	45.695	51.1902	60.6172	76.145	46.8781	1.72405
1026.91	38.6235	86.7284	44.3886	51.3691	60.8613	76.1016	46.5986	1.72204
1027.87	38.348	86.4729	43.1003	51.5382	61.1583	76.167	46.302	1.71688
1028.84	38.0712	86.2028	42.0333	51.6945	61.4695	76.3047	45.995	1.70932
1029.8	37.7998	85.9231	41.4072	51.8402	61.7373	76.4463	45.6864	1.70144
1030.77	37.5404	85.6402	41.3927	51.9823	61.9091	76.5233	45.386	1.69538
1031.73	37.2993	85.3596	42.0459	52.13	61.9601	76.5002	45.1029	1.69201
1032.69	37.0813	85.0846	43.272	52.2934	61.9017	76.3873	44.8435	1.6905
1033.66	36.8896	84.8157	44.837	52.4796	61.7707	76.2269	44.6114	1.68896
1034.62	36.7255	84.5513	46.4305	52.6913	61.604	76.0607	44.4078	1.6858
1035.59	36.5891	84.2889	47.7599	52.9267	61.418	75.9013	44.2321	1.6807
1036.55	36.4797	84.0269	48.6357	53.1799	61.205	75.7255	44.0837	1.67456
1037.52	36.3965	83.7648	49.0136	53.4447	60.9463	75.4931	43.9624	1.66857
1038.48	36.3395	83.5033	48.9785	53.7197	60.6322	75.1763	43.8681	1.6631
1039.44	36.3085	83.2438	48.6861	54.0109	60.2724	74.7785	43.8009	1.65721
1040.41	36.3033	82.9867	48.2873	54.3324	59.8894	74.3343	43.76	1.64921
1041.37	36.3232	82.7321	47.8721	54.7018	59.5003	73.8893	43.744	1.63775
1042.34	36.3668	82.4794	47.4498	55.1332	59.0989	73.4766	43.7508	1.62277
1043.3	36.4326	82.2279	46.9695	55.6303	58.6527	73.1034	43.7784	1.6055
1044.26	36.5189	81.9774	46.3639	56.1849	58.1161	72.7506	43.8249	1.58779
1045.23	36.6241	81.7281	45.5904	56.7804	57.4528	72.3841	43.8893	1.57106
1046.19	36.7464	81.4806	44.6506	57.3999	56.6523	71.9654	43.971	1.55575
1047.16	36.8845	81.2358	43.5847	58.035	55.7342	71.4591	44.0696	1.54137
1048.12	37.0368	80.9949	42.4469	58.69	54.7394	70.8375	44.1847	1.52716
1049.09	37.2021	80.7592	41.2807	59.3823	53.7194	70.0866	44.3156	1.51269
1050.05	37.3794	80.5301	40.1079	60.1354	52.7279	69.2137	44.4612	1.49808
1051.01	37.5678	80.309	38.9333	60.9718	51.8209	68.2533	44.6201	1.48366
1051.98	37.7664	80.0968	37.7621	61.9038	51.0561	67.2644	44.7908	1.46937
1052.94	37.9742	79.8934	36.6116	62.9302	50.4879	66.3153	44.9715	1.4545
1053.91	38.1895	79.6978	35.5118	64.0349	50.1533	65.4602	45.1602	1.43792
1054.87	38.4105	79.5085	34.492	65.1932	50.0558	64.7168	45.3551	1.41876
1055.84	38.6348	79.3244	33.5645	66.3807	50.1579	64.0577	45.5545	1.39714
1056.8	38.8602	79.145	32.7182	67.5849	50.3892	63.4231	45.7574	1.3744
1057.76	39.0845	78.971	31.9279	68.8113	50.6691	62.7507	45.9633	1.35259
1058.73	39.3062	78.8036	31.1727	70.0824	50.9348	62.008	46.1723	1.3335
1059.69	39.5242	78.644	30.4521	71.4283	51.1566	61.2103	46.385	1.31778
1060.66	39.7378	78.4933	29.7874	72.8704	51.337	60.4119	46.602	1.30456
1061.62	39.9472	78.352	29.2052	74.4108	51.4924	59.6775	46.8236	1.29188
1062.59	40.1528	78.2204	28.7155	76.0298	51.6281	59.0478	47.0495	1.27761
1063.55	40.3554	78.0987	28.2956	77.6965	51.7237	58.5163	47.2788	1.26039
1064.51	40.5558	77.9869	27.8942	79.3863	51.7352	58.0326	47.5104	1.24006
1065.48	40.7545	77.8849	27.4539	81.0956	51.613	57.5282	47.7428	1.21758
1066.44	40.9517	77.7918	26.9424	82.844	51.3275	56.9509	47.9745	1.19448
1067.41	41.1468	77.7062	26.3742	84.6651	50.8868	56.2907	48.2039	1.17229
1068.37	41.3396	77.6259	25.8141	86.588	50.3411	55.5867	48.4295	1.15215
1069.34	41.5299	77.5494	25.3583	88.6202	49.7726	54.9153	48.6496	1.13458
1070.3	41.7186	77.4757	25.1028	90.7418	49.2771	54.3654	48.8629	1.11952
1071.26	41.9071	77.4055	25.112	92.9078	48.9448	54.0093	49.0684	1.10639
1072.23	42.0972	77.3404	25.4002	95.0598	48.8463	53.88	49.2658	1.0943
1073.19	42.2908	77.2823	25.9304	97.1364	49.0211	53.9599	49.4553	1.08235
1074.16	42.4887	77.2333	26.63	99.082	49.4727	54.1858	49.6381	1.06988
1075.12	42.691	77.1944	27.4158	100.851	50.1668	54.4691	49.8154	1.05663
1076.08	42.8965	77.1657	28.219	102.41	51.0398	54.7234	49.9882	1.04279
1077.05	43.1031	77.1469	29.004	103.741	52.0132	54.8873	50.1574	1.0288
1078.01	43.3088	77.1371	29.7742	104.841	53.0159	54.9338	50.3229	1.01516
1078.98	43.5113	77.1352	30.5641	105.72	54.0023	54.8614	50.4841	1.00232
1079.94	43.7092	77.1402	31.4198	106.402	54.9624	54.6795	50.6399	0.990536
1080.91	43.9012	77.1504	32.3752	106.918	55.9153	54.4002	50.7885	0.979814
1081.87	44.0862	77.1644	33.4316	107.3	56.8936	54.0444	50.9286	0.969727
1082.83	44.2631	77.1814	34.5502	107.57	57.9226	53.656	51.059	0.959434
1083.8	44.431	77.2015	35.662	107.731	59.0012	53.3081	51.179	0.947956
1084.76	44.589	77.2268	36.693	107.763	60.0921	53.0879	51.2891	0.934765
1085.73	44.7365	77.2599	37.5984	107.632	61.1196	53.0606	51.3901	0.92045
1086.69	44.8736	77.3039	38.3886	107.303	61.9824	53.2339	51.483	0.907002
1087.66	45.0005	77.3602	39.1337	106.774	62.5772	53.5505	51.5683	0.897418
1088.62	45.1172	77.4282	39.9399	106.088	62.8297	53.9197	51.6456	0.894646
1089.58	45.2233	77.5053	40.9049	105.328	62.7189	54.2706	51.7136	0.900364
1090.55	45.3184	77.5876	42.0733	104.591	62.2818	54.5934	51.7702	0.914267
1091.51	45.4018	77.6718	43.4093	103.95	61.5992	54.9442	51.8135	0.934279
1092.48	45.4731	77.7555	44.7991	103.424	60.764	55.4091	51.8419	0.957602
1093.44	45.5325	77.8379	46.0843	102.981	59.8496	56.0466	51.8545	0.982017
1094.4	45.5807	77.9189	47.1123	102.559	58.8931	56.8486	51.8509	1.00672
1095.37	45.6184	77.9984	47.7836	102.112	57.8999	57.7403	51.8306	1.03225
1096.33	45.6462	78.0759	48.075	101.632	56.8606	58.621	51.7933	1.05969
1097.3	45.6644	78.1506	48.0361	101.154	55.7707	59.4126	51.7386	1.08967
1098.26	45.673	78.2222	47.761	100.732	54.6403	60.0911	51.6662	1.12176
1099.23	45.6718	78.2909	47.3511	100.41	53.4936	60.6875	51.5761	1.15458
1100.19	45.6608	78.3578	46.8824	100.198	52.3627	61.2623	51.4689	1.18648
1101.15	45.6399	78.4243	46.392	100.068	51.2807	61.8714	51.3457	1.21626
1102.12	45.6092	78.4911	45.8824	99.9713	50.2773	62.5421	51.2075	1.24348
1103.08	45.5687	78.558	45.3391	99.8527	49.3772	63.2653	51.0552	1.26839
1104.05	45.5178	78.6237	44.7443	99.6701	48.5991	64.0014	50.8892	1.29155
1105.01	45.456	78.6867	44.081	99.3992	47.9532	64.6923	50.7092	1.31345
1105.98	45.382	78.7459	43.3317	99.0348	47.4416	65.2756	50.5145	1.33435
1106.94	45.2947	78.8008	42.4751	98.5884	47.0585	65.6986	50.3038	1.35437
1107.9	45.1924	78.8514	41.4928	98.0864	46.7949	65.9332	50.0754	1.37351
1108.87	45.0738	78.8976	40.3815	97.5649	46.6433	65.9868	49.8275	1.39162
1109.83	44.9376	78.9383	39.1645	97.0614	46.5999	65.9025	49.5585	1.40837
1110.8	44.7831	78.972	37.8918	96.6055	46.663	65.746	49.2674	1.42329
1111.76	44.6103	78.9968	36.6253	96.2091	46.8255	65.5801	48.9538	1.43601
1112.73	44.4201	79.0117	35.4164	95.8658	47.0688	65.4385	48.6185	1.44652
1113.69	44.2141	79.0165	34.289	95.5552	47.3593	65.3112	48.2627	1.4553
1114.65	43.994	79.0123	33.2356	95.2508	47.6534	65.1525	47.8882	1.4632
1115.62	43.7618	79.0004	32.2287	94.9262	47.9092	64.906	47.4966	1.47101
1116.58	43.5188	78.9816	31.237	94.5574	48.1	64.5374	47.0893	1.47909
1117.55	43.2655	78.9563	30.2357	94.123	48.2222	64.0553	46.667	1.48728
1118.51	43.0018	78.9238	29.2092	93.607	48.2946	63.5124	46.2302	1.49508
1119.48	42.7274	78.8836	28.1472	93.0045	48.3482	62.9846	45.779	1.50206
1120.44	42.4418	78.8354	27.0428	92.3281	48.4127	62.5386	45.3135	1.50805
1121.4	42.1451	78.7797	25.8959	91.6081	48.505	62.2049	44.834	1.51321
1122.37	41.8374	78.7176	24.7185	90.8839	48.6243	61.9678	44.3408	1.51779
1123.33	41.5189	78.6502	23.536	90.1891	48.7544	61.7739	43.8348	1.5219
1124.3	41.1896	78.5781	22.3803	89.5374	48.87	61.5575	43.3167	1.52551
1125.26	40.8492	78.5013	21.2784	88.9186	48.9446	61.2675	42.7873	1.52859
1126.22	40.4973	78.4194	20.2431	88.3076	48.9582	60.8882	42.2471	1.53132
1127.19	40.134	78.3317	19.271	87.6795	48.9023	60.4435	41.6965	1.53416
1128.15	39.7598	78.2377	18.351	87.0234	48.7824	59.9861	41.1361	1.53757
1129.12	39.3762	78.1376	17.4724	86.3451	48.6155	59.5745	40.5673	1.54168
1130.08	38.9861	78.0327	16.6305	85.6586	48.4231	59.2478	39.9927	1.54601
1131.05	38.5926	77.9252	15.8243	84.9762	48.2225	59.0083	39.4159	1.54942
1132.01	38.1994	77.8184	15.0504	84.2998	48.0196	58.8172	38.8417	1.55064
1132.97	37.8101	77.7154	14.3008	83.6224	47.8073	58.6088	38.2749	1.54888
1133.94	37.4273	77.6192	13.5654	82.9343	47.5725	58.3143	37.7201	1.54435
1134.9	37.0529	77.5313	12.8398	82.2295	47.3064	57.8907	37.1807	1.53827
1135.87	36.6885	77.4518	12.1287	81.5069	47.0142	57.3396	36.659	1.53227
1136.83	36.3353	77.3793	11.4429	80.7686	46.7157	56.7084	36.1565	1.52744
1137.8	35.9949	77.3116	10.7883	80.0164	46.4385	56.0745	35.6743	1.52357
1138.76	35.6693	77.246	10.1544	79.2508	46.2026	55.5135	35.2134	1.51927
1139.72	35.361	77.1804	9.51115	78.474	46.0068	55.0681	34.775	1.5128
1140.69	35.0725	77.1139	8.8188	77.6907	45.8228	54.7278	34.3608	1.50327
1141.65	34.8069	77.0474	8.0462	76.9088	45.6038	54.432	33.9728	1.49141
1142.62	34.5669	76.9833	7.18915	76.1358	45.3036	54.0962	33.614	1.47919
1143.58	34.3553	76.9251	6.2769	75.3752	44.8999	53.6525	33.2877	1.46869
1144.55	34.1744	76.8763	5.3622	74.6268	44.4068	53.0827	32.9978	1.46085
1145.51	34.0255	76.8393	4.5015	73.8878	43.8738	52.4304	32.7477	1.45503
1146.47	33.9084	76.8148	3.7344	73.1569	43.3674	51.7849	32.5395	1.44974
1147.44	33.8214	76.8018	3.07205	72.4355	42.9468	51.2452	32.3731	1.44394
1148.4	33.7619	76.7983	2.49975	71.7267	42.6428	50.8809	32.2463	1.43793
1149.37	33.7269	76.8028	1.99255	71.0335	42.4526	50.7096	32.1553	1.43331
1150.33	33.714	76.8146	1.53515	70.3573	42.3493	50.6998	32.0958	1.43186
1151.29	33.7218	76.8344	1.13995	69.6997	42.2987	50.7942	32.064	1.43453
1152.26	33.7497	76.8635	0.8565	69.0629	42.2758	50.9363	32.0574	1.44096
1153.22	33.7973	76.9029	0.76825	68.4523	42.27	51.0887	32.0746	1.4501
1154.19	33.8641	76.9531	0.97305	67.8745	42.2836	51.2359	32.115	1.46112
1155.15	33.9491	77.0139	1.5512	67.3345	42.3228	51.3777	32.1779	1.47399
1156.12	34.0514	77.0845	2.52975	66.8336	42.391	51.5202	32.2627	1.48921
1157.08	34.1703	77.1648	3.85945	66.368	42.4852	51.6729	32.3683	1.507
1158.04	34.3057	77.255	5.4159	65.931	42.5962	51.8514	32.4939	1.52667
1159.01	34.4579	77.3559	7.0268	65.5146	42.7087	52.0785	32.639	1.54672
1159.97	34.6272	77.4684	8.5174	65.1115	42.8019	52.3786	32.803	1.56568
1160.94	34.8135	77.5931	9.75475	64.7163	42.8484	52.7654	32.9855	1.58305
1161.9	35.0162	77.7304	10.6755	64.3265	42.8178	53.2295	33.1857	1.5998
1162.87	35.2341	77.8801	11.2884	63.9434	42.6844	53.7371	33.4028	1.61786
1163.83	35.4657	78.042	11.657	63.572	42.4391	54.2435	33.6356	1.63922
1164.79	35.7096	78.2156	11.8735	63.2204	42.1029	54.7156	33.8832	1.6649
1165.76	35.965	78.4005	12.0346	62.8976	41.7331	55.1523	34.1447	1.69438
1166.72	36.231	78.5966	12.2209	62.611	41.4198	55.5885	34.4196	1.72591
1167.69	36.5074	78.8035	12.4835	62.363	41.2696	56.0795	34.7073	1.75721
1168.65	36.7936	79.0212	12.8376	62.1517	41.3792	56.6733	35.0072	1.78645
1169.62	37.0889	79.2494	13.264	61.972	41.8083	57.3858	35.318	1.81297
1170.58	37.3921	79.488	13.7208	61.818	42.5607	58.1934	35.6384	1.8374
1171.54	37.7017	79.7362	14.16	61.6853	43.5834	59.0463	35.9667	1.8612
1172.51	38.0164	79.993	14.5457	61.5722	44.781	59.894	36.3016	1.88589
1173.47	38.3351	80.2567	14.8613	61.4772	46.0435	60.7062	36.6419	1.9122
1174.44	38.6577	80.5251	15.1077	61.3981	47.2726	61.4791	36.9875	1.93988
1175.4	38.9847	80.7962	15.2929	61.3304	48.3997	62.2277	37.3387	1.96807
1176.36	39.3172	81.0678	15.425	61.2674	49.3892	62.9697	37.6968	1.99611
1177.33	39.6566	81.3381	15.5114	61.2015	50.2324	63.7152	38.0634	2.02415
1178.29	40.0044	81.606	15.567	61.1264	50.9376	64.4664	38.4402	2.05311
1179.26	40.3616	81.8708	15.6203	61.0386	51.5211	65.2237	38.8284	2.08404
1180.22	40.7287	82.1317	15.7125	60.9387	52.004	65.9922	39.2287	2.11727
1181.19	41.106	82.3888	15.8854	60.83	52.4094	66.7797	39.641	2.15198
1182.15	41.4927	82.6415	16.1657	60.7169	52.7593	67.5911	40.0641	2.1866
1183.11	41.8879	82.8896	16.5548	60.6033	53.0695	68.4206	40.4962	2.21964
1184.08	42.2898	83.1328	17.0295	60.4906	53.3456	69.2499	40.9349	2.25049
1185.04	42.6963	83.3709	17.5552	60.3783	53.5824	70.0541	41.3778	2.27953
1186.01	43.1053	83.6039	18.1026	60.2649	53.7668	70.8105	41.8221	2.30765
1186.97	43.5145	83.8321	18.6587	60.1491	53.8826	71.5063	42.2655	2.33551
1187.94	43.9217	84.056	19.2277	60.03	53.915	72.1404	42.7057	2.36314
1188.9	44.3248	84.2763	19.8209	59.907	53.8529	72.7197	43.1408	2.39001
1189.86	44.7216	84.4933	20.4429	59.7781	53.69	73.2536	43.5692	2.41547
1190.83	45.1095	84.7067	21.0816	59.6409	53.4246	73.7497	43.9888	2.43917
1191.79	45.4859	84.9154	21.7059	59.4925	53.0618	74.21	44.3976	2.46124
1192.76	45.8479	85.1177	22.2748	59.3323	52.6146	74.6308	44.793	2.48213
1193.72	46.1928	85.3113	22.7517	59.1631	52.1046	75.0044	45.1724	2.50236
1194.69	46.5183	85.494	23.1171	58.99	51.5594	75.3225	45.5332	2.52225
1195.65	46.8229	85.6642	23.373	58.8182	51.0071	75.5819	45.8734	2.54173
1196.61	47.1058	85.8212	23.5361	58.6504	50.4699	75.7888	46.1918	2.56043
1197.58	47.3669	85.9653	23.6215	58.4858	49.9616	75.9654	46.4882	2.57787
1198.54	47.6065	86.0974	23.6364	58.3165	49.4751	76.1231	46.7633	2.59383
1199.51	47.8253	86.2183	23.5672	58.1358	48.9974	76.2754	47.0187	2.60861
1200.47	48.0238	86.3282	23.3899	57.9398	48.5124	76.4232	47.2558	2.62297
1201.43	48.2021	86.4263	23.0854	57.73	48.0095	76.5566	47.4755	2.63769
1202.4	48.3598	86.511	22.6574	57.5112	47.4861	76.654	47.6778	2.65306
1203.36	48.4958	86.5803	22.1329	57.294	46.962	76.7134	47.8616	2.66854
1204.33	48.6089	86.6328	21.5696	57.0871	46.4646	76.7348	48.0248	2.68303
1205.29	48.6981	86.6676	21.045	56.8958	46.0271	76.7255	48.1653	2.69548
1206.26	48.7627	86.6851	20.6479	56.7215	45.6819	76.6929	48.2815	2.70552
1207.22	48.803	86.6862	20.4709	56.5618	45.455	76.6393	48.3727	2.71351
1208.18	48.8195	86.6719	20.6015	56.4117	45.3647	76.5623	48.4395	2.72013
1209.15	48.813	86.6434	21.1079	56.2655	45.4218	76.4617	48.4833	2.7257
1210.11	48.7843	86.6013	22.0206	56.1176	45.6319	76.3444	48.5057	2.72983
1211.08	48.7339	86.5466	23.3137	55.9639	45.996	76.2241	48.5084	2.73158
1212.04	48.6622	86.4802	24.8956	55.8024	46.5087	76.1126	48.4925	2.73013
1213.01	48.5696	86.403	26.6166	55.6326	47.1562	76.0105	48.4591	2.72536
1213.97	48.4567	86.316	28.2955	55.4554	47.9136	75.9016	48.4089	2.71797
1214.93	48.3243	86.2197	29.7555	55.2723	48.7476	75.7571	48.3426	2.70925
1215.9	48.1736	86.1145	30.8602	55.0853	49.6213	75.5489	48.2611	2.70037
1216.86	48.0058	86.0002	31.5359	54.8968	50.5027	75.2611	48.1653	2.69186
1217.83	47.8223	85.877	31.7765	54.7094	51.3713	74.8986	48.0563	2.68332
1218.79	47.6243	85.7454	31.6294	54.5263	52.2183	74.4832	47.9353	2.67348
1219.76	47.4132	85.6064	31.1724	54.3501	53.0417	74.0438	47.8036	2.66071
1220.72	47.1905	85.4615	30.4893	54.182	53.8355	73.6021	47.6625	2.64368
1221.68	46.9576	85.3123	29.6525	54.0215	54.5806	73.1627	47.5128	2.62197
1222.65	46.7159	85.1597	28.7172	53.865	55.2413	72.71	47.3554	2.59642
1223.61	46.4666	85.0042	27.7245	53.7079	55.7711	72.2126	47.1905	2.56887
1224.58	46.2112	84.8456	26.7084	53.5452	56.1255	71.6342	47.0184	2.54134
1225.54	45.9508	84.6837	25.7016	53.373	56.2769	70.9476	46.8396	2.5151
1226.51	45.6867	84.5186	24.7353	53.1897	56.2256	70.1456	46.655	2.48996
1227.47	45.4203	84.3511	23.835	52.9954	56.0029	69.2468	46.4661	2.46424
1228.43	45.1527	84.1826	23.015	52.7903	55.6657	68.2917	46.2748	2.43557
1229.4	44.885	84.0151	22.2769	52.5747	55.2854	67.3328	46.0834	2.40196
1230.36	44.6181	83.8501	21.6123	52.3486	54.934	66.4201	45.8937	2.36277
1231.33	44.3525	83.6892	21.0077	52.1138	54.6715	65.5899	45.7069	2.3191
1232.29	44.0885	83.5332	20.449	51.8761	54.5345	64.8602	45.5235	2.27347
1233.25	43.8263	83.3825	19.9219	51.6477	54.5283	64.233	45.3431	2.22922
1234.22	43.5663	83.2374	19.4075	51.4475	54.6251	63.7007	45.1653	2.18991
1235.18	43.3092	83.0982	18.8802	51.2981	54.7689	63.2522	44.9896	2.15885
1236.15	43.0557	82.9652	18.3084	51.2218	54.8871	62.8766	44.816	2.13895
1237.11	42.8062	82.8387	17.6617	51.2351	54.9072	62.5641	44.645	2.13237
1238.08	42.5614	82.7187	16.9199	51.3456	54.774	62.3088	44.4772	2.14008
1239.04	42.3214	82.6052	16.0814	51.549	54.4596	62.1108	44.3132	2.16144
1240	42.0865	82.4979	15.1669	51.83	53.9667	61.9768	44.154	2.19397
1240.97	41.8574	82.3967	14.2171	52.1642	53.3216	61.915	44.0004	2.2336
1241.93	41.6349	82.3019	13.2838	52.5215	52.5628	61.926	43.8533	2.27544
1242.9	41.4204	82.2142	12.4207	52.8709	51.7278	61.99	43.7136	2.31465
1243.86	41.2153	82.1349	11.6729	53.1859	50.8432	62.0624	43.5821	2.34727
1244.83	41.0209	82.065	11.0712	53.4485	49.9226	62.0805	43.4595	2.37076
1245.79	40.8383	82.0059	10.6311	53.6514	48.9705	61.9849	43.3462	2.38417
1246.75	40.6681	81.9582	10.3583	53.7979	47.9937	61.7449	43.2425	2.38819
1247.72	40.5105	81.922	10.2569	53.8973	47.0118	61.3764	43.1484	2.38493
1248.68	40.3654	81.8967	10.3384	53.9618	46.0643	60.9431	43.0641	2.37758
1249.65	40.2324	81.8813	10.6248	54.0022	45.2089	60.5378	42.9892	2.3699
1250.61	40.1109	81.8747	11.1433	54.0274	44.5104	60.2545	42.9235	2.36549
1251.58	39.9999	81.8757	11.9162	54.0438	44.0238	60.16	42.8667	2.36702
1252.54	39.8989	81.8836	12.9473	54.0562	43.7796	60.2783	42.8185	2.37548
1253.5	39.8073	81.8983	14.2147	54.0686	43.7766	60.5894	42.7786	2.38988
1254.47	39.725	81.9204	15.6689	54.0834	43.9858	61.0399	42.747	2.40748
1255.43	39.6522	81.9506	17.2382	54.1013	44.3612	61.5596	42.7237	2.42467
1256.4	39.5894	81.9896	18.838	54.1213	44.853	62.0765	42.7089	2.43839
1257.36	39.5372	82.0381	20.3829	54.1423	45.4176	62.5315	42.7028	2.4473
1258.32	39.4957	82.096	21.7991	54.164	46.0233	62.8891	42.7054	2.45232
1259.29	39.4647	82.1625	23.0399	54.187	46.6521	63.1437	42.7165	2.45601
1260.25	39.4436	82.2364	24.095	54.2118	47.2992	63.3201	42.7358	2.46133
1261.22	39.4318	82.3164	24.9932	54.2384	47.9711	63.4652	42.7627	2.4703
1262.18	39.4289	82.4014	25.7918	54.2646	48.6811	63.6324	42.7967	2.48348
1263.15	39.4345	82.491	26.5555	54.2874	49.4421	63.8668	42.838	2.50031
1264.11	39.4489	82.585	27.3339	54.3038	50.2589	64.1929	42.8866	2.51987
1265.07	39.4722	82.6842	28.1468	54.3128	51.1234	64.6146	42.9432	2.54157
1266.04	39.5049	82.7891	28.9842	54.3148	52.0147	65.1196	43.0083	2.56536
1267	39.547	82.9002	29.819	54.312	52.9055	65.6885	43.0823	2.59149
1267.97	39.5985	83.0179	30.6236	54.3066	53.771	66.3018	43.1653	2.6204
1268.93	39.6594	83.1423	31.3812	54.2998	54.5953	66.9432	43.257	2.65257
1269.9	39.7299	83.2733	32.0874	54.2929	55.3742	67.6013	43.357	2.68842
1270.86	39.8101	83.4108	32.7443	54.2878	56.1125	68.2709	43.465	2.72794
1271.82	39.9002	83.5545	33.3504	54.2875	56.8175	68.9518	43.5809	2.77027
1272.79	40	83.704	33.8954	54.2959	57.4922	69.6462	43.7047	2.81358
1273.75	40.1087	83.8586	34.3585	54.3162	58.1302	70.353	43.8364	2.85553
1274.72	40.2249	84.0173	34.7109	54.3484	58.7142	71.0618	43.9753	2.89418
1275.68	40.3468	84.1791	34.9211	54.3886	59.2191	71.7523	44.121	2.92877
1276.65	40.473	84.3432	34.9605	54.4291	59.6168	72.3987	44.2725	2.95984
1277.61	40.6023	84.5089	34.8072	54.4618	59.8832	72.9784	44.4294	2.98867
1278.57	40.7344	84.6761	34.4504	54.4809	60.0032	73.4787	44.5913	3.01644
1279.54	40.8696	84.8448	33.8922	54.4855	59.974	73.8997	44.7584	3.04378
1280.5	41.0083	85.015	33.1495	54.4793	59.8075	74.2528	44.9308	3.07053
1281.47	41.151	85.1864	32.2544	54.4691	59.5297	74.5564	45.1085	3.09583
1282.43	41.2975	85.358	31.2521	54.4626	59.1805	74.835	45.2909	3.11817
1283.39	41.447	85.5284	30.1974	54.465	58.8087	75.115	45.4772	3.1356
1284.36	41.5985	85.6956	29.1488	54.4779	58.4654	75.4193	45.6663	3.14647
1285.32	41.7511	85.8578	28.161	54.5007	58.1938	75.7567	45.8571	3.15061
1286.29	41.9043	86.0135	27.2796	54.5296	58.0212	76.1141	46.049	3.15021
1287.25	42.0581	86.1618	26.5378	54.5615	57.9577	76.4556	46.2418	3.14957
1288.22	42.2131	86.3024	25.9572	54.5943	58.001	76.7358	46.4362	3.15345
1289.18	42.37	86.4356	25.5477	54.628	58.1461	76.9202	46.6334	3.16472
1290.14	42.5293	86.5617	25.3082	54.6654	58.3927	77.0007	46.8351	3.18284
1291.11	42.6913	86.6811	25.2275	54.7099	58.7452	76.9994	47.0429	3.20431
1292.07	42.8558	86.7947	25.2874	54.764	59.2069	76.9561	47.258	3.22464
1293.04	43.0222	86.9029	25.4704	54.8274	59.7714	76.9104	47.4808	3.24076
1294	43.189	87.0067	25.7688	54.8961	60.4183	76.8876	47.7102	3.25207
1294.97	43.3542	87.1066	26.1907	54.9653	61.1165	76.8971	47.944	3.25983
1295.93	43.515	87.2029	26.7577	55.03	61.8325	76.9403	48.1786	3.26558
1296.89	43.6682	87.2952	27.4905	55.0889	62.5361	77.0168	48.4096	3.27001
1297.86	43.8106	87.3832	28.3906	55.1442	63.2019	77.126	48.6326	3.27289
1298.82	43.9394	87.466	29.4261	55.2012	63.8033	77.2618	48.8438	3.2739
1299.79	44.0525	87.5432	30.5332	55.2657	64.3069	77.4079	49.0401	3.27328
1300.75	44.1488	87.6148	31.6325	55.3413	64.6701	77.538	49.2198	3.27187
1301.72	44.2276	87.6808	32.6565	55.429	64.8483	77.6247	49.3822	3.27055
1302.68	44.2889	87.7412	33.5731	55.5267	64.8085	77.649	49.5275	3.26989
1303.64	44.3325	87.7956	34.3957	55.6315	64.544	77.608	49.6561	3.27008
1304.61	44.358	87.843	35.1753	55.7402	64.0831	77.5138	49.7688	3.2713
1305.57	44.3651	87.8825	35.9783	55.8509	63.4857	77.3869	49.8661	3.2735
1306.54	44.3538	87.913	36.8608	55.9617	62.8299	77.2478	49.9483	3.27599
1307.5	44.3247	87.9342	37.8488	56.0703	62.1913	77.1101	50.0157	3.27704
1308.46	44.279	87.9465	38.9299	56.1733	61.6232	76.9776	50.0689	3.27439
1309.43	44.2186	87.9508	40.0563	56.2672	61.1463	76.8472	50.1088	3.26654
1310.39	44.1452	87.9484	41.1574	56.3492	60.7495	76.7134	50.1369	3.25398
1311.36	44.0607	87.9408	42.1555	56.4186	60.4023	76.5739	50.1549	3.23916
1312.32	43.966	87.9288	42.9802	56.4771	60.0725	76.4317	50.1641	3.22492
1313.29	43.8613	87.9129	43.578	56.5285	59.7413	76.2936	50.1657	3.21254
1314.25	43.7462	87.8928	43.9154	56.5765	59.4119	76.1658	50.16	3.20103
1315.21	43.6194	87.8681	43.9788	56.6233	59.1096	76.0489	50.1466	3.1883
1316.18	43.4795	87.8376	43.7715	56.6692	58.8751	75.9383	50.1245	3.17364
1317.14	43.325	87.8003	43.3147	56.7118	58.7541	75.8287	50.0923	3.15923
1318.11	43.1547	87.7552	42.6491	56.7473	58.785	75.7201	50.0484	3.14949
1319.07	42.9681	87.7014	41.8355	56.7717	58.9889	75.6191	49.9913	3.14836
1320.04	42.7651	87.6381	40.9526	56.7807	59.3633	75.5336	49.9195	3.1565
1321	42.5461	87.5652	40.0868	56.7711	59.8796	75.4625	49.8316	3.17046
1321.96	42.3119	87.4827	39.3212	56.7424	60.4881	75.388	49.7271	3.18447
1322.93	42.0633	87.3906	38.7225	56.6956	61.127	75.2786	49.6058	3.19363
1323.89	41.8011	87.2888	38.3321	56.6345	61.7358	75.1022	49.4683	3.19614
1324.86	41.5261	87.1773	38.1626	56.5641	62.2679	74.8441	49.3156	3.1934
1325.82	41.2386	87.0552	38.2	56.4888	62.6994	74.5182	49.1486	3.18807
1326.79	40.9389	86.9219	38.4086	56.4113	63.0303	74.1628	48.9681	3.18193
1327.75	40.6271	86.7764	38.7382	56.3327	63.2783	73.8241	48.7748	3.17508
1328.71	40.3033	86.6185	39.133	56.2538	63.4688	73.5357	48.5696	3.16679
1329.68	39.9683	86.4486	39.5402	56.1767	63.6238	73.3051	48.3534	3.15679
1330.64	39.6229	86.2679	39.9166	56.1048	63.7546	73.1156	48.1278	3.14548
1331.61	39.2685	86.0781	40.2317	56.0421	63.8606	72.9395	47.8943	3.13249
1332.57	38.9064	85.8811	40.4668	55.9908	63.933	72.7543	47.654	3.11477
1333.53	38.5373	85.6786	40.6102	55.9491	63.959	72.5506	47.4073	3.08627
1334.5	38.1612	85.4714	40.654	55.9117	63.9269	72.3312	47.1535	3.04069
1335.46	37.7775	85.2593	40.5943	55.8717	63.8299	72.1023	46.8911	2.97638
1336.43	37.3852	85.0411	40.4357	55.825	63.6688	71.8665	46.6181	2.90045
1337.39	36.9835	84.8151	40.1983	55.773	63.4558	71.6231	46.3327	2.82869
1338.36	36.5715	84.5791	39.9183	55.7225	63.2138	71.3743	46.034	2.78027
1339.32	36.149	84.3315	39.6395	55.6822	62.9699	71.1288	45.7217	2.76932
1340.28	35.7164	84.0714	39.398	55.6591	62.7467	70.9005	45.3968	2.7979
1341.25	35.2744	83.7994	39.2094	55.6549	62.5536	70.7015	45.0607	2.85469
1342.21	34.8241	83.5169	39.0628	55.6662	62.3837	70.5349	44.7152	2.92
1343.18	34.3668	83.2259	38.9278	55.6863	62.218	70.3914	44.3623	2.97442
1344.14	33.904	82.9289	38.7704	55.7091	62.0375	70.2528	44.0037	3.00616
1345.11	33.4371	82.6277	38.5677	55.7317	61.832	70.1026	43.6411	3.01388
1346.07	32.9672	82.3235	38.3134	55.7538	61.6031	69.9307	43.2762	3.00439
1347.03	32.4951	82.0172	38.0108	55.7772	61.3569	69.734	42.9104	2.98754
1348	32.0217	81.7096	37.6623	55.8025	61.0951	69.5108	42.5452	2.97138
1348.96	31.5479	81.4018	37.2619	55.83	60.8103	69.2543	42.1818	2.95941
1349.93	31.0748	81.0951	36.7972	55.8587	60.4887	68.9522	41.8212	2.9506
1350.89	30.6036	80.7907	36.2574	55.8883	60.1198	68.5914	41.4643	2.94134
1351.86	30.1358	80.4897	35.6431	55.9194	59.7072	68.1676	41.1119	2.92835
1352.82	29.6725	80.1927	34.9723	55.9537	59.2713	67.6916	40.7648	2.91111
1353.78	29.2148	79.8999	34.2764	55.993	58.8445	67.1915	40.4241	2.89202
1354.75	28.7636	79.6116	33.5897	56.0384	58.4588	66.7023	40.0905	2.87385
1355.71	28.3199	79.3285	32.9372	56.0898	58.1324	66.2544	39.7651	2.85579
1356.68	27.8845	79.0518	32.3263	56.1459	57.8635	65.86	39.4489	2.83114
1357.64	27.458	78.7832	31.7446	56.2051	57.6313	65.5086	39.1428	2.78965
1358.61	27.0412	78.5245	31.1641	56.2655	57.4036	65.1699	38.8479	2.72445
1359.57	26.6347	78.2768	30.5525	56.3259	57.1491	64.8067	38.565	2.63928
1360.53	26.2391	78.0408	29.886	56.3843	56.8489	64.3905	38.2951	2.55049
1361.5	25.8552	77.816	29.1568	56.4394	56.4999	63.9102	38.0386	2.48077
1362.46	25.4834	77.6015	28.3703	56.4896	56.1103	63.3702	37.7961	2.44762
1363.43	25.1246	77.3963	27.5333	56.5347	55.6885	62.7799	37.5676	2.45366
1364.39	24.7792	77.1994	26.6421	56.5757	55.2332	62.1424	37.3534	2.4853
1365.35	24.4479	77.0106	25.6757	56.6151	54.7278	61.4492	37.1537	2.52046
1366.32	24.1314	76.8301	24.6025	56.6558	54.1461	60.6837	36.9687	2.53984
1367.28	23.8307	76.6588	23.3977	56.6987	53.4649	59.8338	36.7989	2.53417
1368.25	23.5465	76.4975	22.0614	56.7416	52.6786	58.9031	36.6445	2.50389
1369.21	23.2794	76.3473	20.6242	56.7788	51.8044	57.913	36.5058	2.45369
1370.18	23.0296	76.2085	19.1377	56.8032	50.8762	56.8959	36.383	2.38789
1371.14	22.7969	76.0815	17.6549	56.8092	49.9327	55.8825	36.2762	2.3106
1372.1	22.5809	75.9658	16.2155	56.7966	49.0061	54.8946	36.1852	2.22906
1373.07	22.3813	75.8608	14.8382	56.7709	48.1176	53.9427	36.1098	2.15526
1374.03	22.1981	75.766	13.5259	56.741	47.2761	53.0294	36.0501	2.10219
1375	22.0314	75.6807	12.2741	56.7153	46.4832	52.1555	36.006	2.07656
1375.96	21.8819	75.6051	11.0797	56.6974	45.7356	51.3234	35.9781	2.07391
1376.93	21.75	75.5395	9.94815	56.685	45.0284	50.5388	35.9668	2.08087
1377.89	21.6364	75.485	8.8976	56.6722	44.3579	49.8113	35.9728	2.08368
1378.85	21.5414	75.4425	7.9615	56.6535	43.7261	49.1529	35.9965	2.07659
1379.82	21.4656	75.4128	7.1839	56.6264	43.1432	48.5775	36.0378	2.06353
1380.78	21.4091	75.396	6.6089	56.593	42.6257	48.1009	36.0965	2.05178
1381.75	21.3715	75.3915	6.2676	56.5584	42.1903	47.7411	36.1716	2.04344
1382.71	21.3522	75.3983	6.16715	56.5289	41.8467	47.5205	36.2623	2.03239
1383.67	21.3502	75.4154	6.2859	56.5118	41.5928	47.4629	36.3674	2.00991
1384.64	21.3646	75.4418	6.57425	56.5147	41.4146	47.5825	36.4863	1.97461
1385.6	21.3946	75.4771	6.9632	56.5441	41.2899	47.8654	36.6183	1.93763
1386.57	21.4398	75.5216	7.37855	56.6021	41.1945	48.2589	36.7629	1.91765
1387.53	21.5002	75.5755	7.75705	56.6837	41.11	48.6797	36.92	1.92825
1388.5	21.576	75.6394	8.06065	56.7774	41.0297	49.0409	37.0891	1.96679
1389.46	21.6671	75.7133	8.2864	56.8681	40.965	49.282	37.2699	2.01369
1390.42	21.7733	75.7969	8.4709	56.9419	40.9492	49.3976	37.462	2.04318
1391.39	21.8941	75.8898	8.68405	56.992	41.0372	49.4465	37.6649	2.03835
1392.35	22.0291	75.9915	9.00965	57.0213	41.2927	49.5324	37.8785	2.00043
1393.32	22.178	76.1019	9.5213	57.0408	41.7703	49.7651	38.1027	1.947
1394.28	22.3408	76.2211	10.2635	57.0643	42.4973	50.2264	38.338	1.90176
1395.25	22.518	76.3497	11.2434	57.1037	43.4674	50.9509	38.5848	1.88388
1396.21	22.7098	76.4882	12.4302	57.1653	44.6433	51.9243	38.8435	1.90286
1397.17	22.9168	76.6367	13.7639	57.2495	45.9671	53.0928	39.1138	1.95947
1398.14	23.1391	76.795	15.172	57.3503	47.3751	54.3834	39.3954	2.04859
1399.1	23.3768	76.9622	16.5914	57.4585	48.8143	55.7271	39.6872	2.16034
1400.07	23.6296	77.1377	17.9861	57.5647	50.2503	57.0776	39.9885	2.28004
1401.03	23.8967	77.3208	19.3531	57.6618	51.6684	58.416	40.298	2.39028
1402	24.1765	77.511	20.7163	57.7458	53.0658	59.7437	40.6141	2.47705
1402.96	24.4669	77.7078	22.1045	57.8167	54.4381	61.0658	40.9349	2.53708
1403.92	24.765	77.9104	23.5261	57.877	55.7641	62.3717	41.2576	2.58044
1404.89	25.0677	78.1175	24.9557	57.9307	57.0005	63.6281	41.5798	2.62476
1405.85	25.3722	78.3275	26.3438	57.9816	58.0917	64.7878	41.8999	2.68385
1406.82	25.6774	78.539	27.6411	58.0324	58.9886	65.8093	42.2181	2.75883
1407.78	25.9833	78.751	28.8237	58.0849	59.6666	66.6766	42.5365	2.83854
1408.75	26.2918	78.9632	29.9022	58.1399	60.1356	67.4083	42.8582	2.90907
1409.71	26.6055	79.1759	30.9111	58.1978	60.4326	68.0496	43.1869	2.96405
1410.67	26.9273	79.39	31.8794	58.2585	60.6046	68.6508	43.5259	3.00664
1411.64	27.2597	79.6068	32.809	58.3213	60.6913	69.2474	43.8765	3.04087
1412.6	27.6037	79.8269	33.6708	58.386	60.7186	69.8521	44.2381	3.06027
1413.57	27.9586	80.0506	34.4186	58.4541	60.7032	70.4578	44.6081	3.04547
1414.53	28.3221	80.2767	35.0106	58.5303	60.6639	71.0461	44.9825	2.97597
1415.49	28.6907	80.5034	35.4278	58.6221	60.6332	71.5952	45.3573	2.8494
1416.46	29.0606	80.7284	35.6825	58.7362	60.6579	72.085	45.7292	2.69299
1417.42	29.4288	80.9499	35.8108	58.873	60.7859	72.5011	46.0967	2.55637
1418.39	29.7936	81.1665	35.8546	59.0246	61.0448	72.8374	46.4599	2.48795
1419.35	30.1548	81.378	35.8444	59.1779	61.4349	73.097	46.8198	2.50999
1420.32	30.5132	81.585	35.7918	59.3212	61.9317	73.2933	47.1775	2.60918
1421.28	30.8702	81.7882	35.6874	59.4482	62.4929	73.4454	47.5339	2.74782
1422.24	31.2266	81.9883	35.5092	59.5615	63.072	73.5734	47.8888	2.88591
1423.21	31.583	82.1859	35.236	59.6705	63.6317	73.6916	48.2422	2.99807
1424.17	31.9391	82.3813	34.8588	59.785	64.1466	73.8055	48.593	3.07604
1425.14	32.2938	82.5741	34.3798	59.9104	64.5982	73.9126	48.94	3.1206
1426.1	32.6455	82.7633	33.806	60.0457	64.9741	74.0028	49.2816	3.13433
1427.07	32.992	82.9473	33.1452	60.1859	65.2729	74.0622	49.616	3.12209
1428.03	33.3313	83.124	32.41	60.3241	65.5075	74.0777	49.941	3.09551
1428.99	33.6617	83.2913	31.623	60.4531	65.701	74.0448	50.2544	3.07173
1429.96	33.9819	83.4475	30.8173	60.5675	65.8789	73.9731	50.5545	3.06265
1430.92	34.2919	83.5918	30.026	60.6638	66.0589	73.8859	50.84	3.06216
1431.89	34.592	83.7244	29.2672	60.7408	66.245	73.814	51.1104	3.04498
1432.85	34.8832	83.8461	28.5306	60.7991	66.4249	73.7826	51.3657	2.98307
1433.82	35.1658	83.9576	27.78	60.8397	66.575	73.7972	51.6062	2.87037
1434.78	35.4402	84.0591	26.9828	60.8625	66.6703	73.8372	51.8322	2.73681
1435.74	35.7054	84.1502	26.1413	60.8666	66.6978	73.8666	52.0438	2.63807
1436.71	35.9606	84.2301	25.2992	60.8509	66.6603	73.853	52.2407	2.62556
1437.67	36.2047	84.298	24.5235	60.816	66.575	73.783	52.4229	2.71622
1438.64	36.437	84.3539	23.8834	60.7655	66.4669	73.6658	52.5902	2.88258
1439.6	36.6577	84.398	23.4276	60.7051	66.3606	73.5272	52.743	3.06852
1440.56	36.8675	84.4313	23.1705	60.6403	66.2717	73.3944	52.8816	3.21855
1441.53	37.0671	84.4549	23.1051	60.5746	66.2065	73.2789	53.0067	3.301
1442.49	37.2578	84.4698	23.2268	60.5072	66.1677	73.1711	53.1189	3.31327
1443.46	37.4404	84.4771	23.5459	60.4338	66.1617	73.0493	53.2194	3.27174
1444.42	37.6155	84.4776	24.0846	60.3483	66.1998	72.894	53.3092	3.19825
1445.39	37.7837	84.4719	24.8647	60.2457	66.2964	72.7007	53.3897	3.11305
1446.35	37.9449	84.4606	25.8893	60.1251	66.4621	72.4844	53.4618	3.03488
1447.31	38.0987	84.4439	27.1245	59.9907	66.695	72.2717	53.5254	2.98176
1448.28	38.2445	84.4215	28.4926	59.8514	66.9776	72.0875	53.5792	2.96641
1449.24	38.3814	84.3927	29.8812	59.7178	67.2791	71.9413	53.6211	2.98687
1450.21	38.5094	84.3565	31.1651	59.5994	67.5621	71.8224	53.6491	3.0194
1451.17	38.6291	84.3123	32.2296	59.502	67.7909	71.7022	53.6618	3.02154
1452.14	38.7419	84.26	32.9877	59.4256	67.9361	71.5423	53.6598	2.94804
1453.1	38.8498	84.2004	33.3839	59.3639	67.9772	71.3058	53.6453	2.77433
1454.06	38.9546	84.1353	33.3912	59.3063	67.9073	70.9693	53.6217	2.516
1455.03	39.0582	84.0672	33.0261	59.2422	67.7422	70.5361	53.5929	2.2321
1455.99	39.162	83.9988	32.3678	59.1662	67.5204	70.0373	53.5628	2.00657
1456.96	39.2669	83.9328	31.537	59.0791	67.2824	69.5122	53.5346	1.91305
1457.92	39.3738	83.8715	30.6604	58.9858	67.0636	68.9995	53.5101	1.97928
1458.89	39.4828	83.8164	29.8605	58.8941	66.8999	68.5395	53.4898	2.17087
1459.85	39.5941	83.7684	29.2463	58.8108	66.8281	68.1711	53.4735	2.40612
1460.81	39.7077	83.7274	28.9051	58.7363	66.8931	67.9349	53.4602	2.59659
1461.78	39.8234	83.6932	28.9216	58.6651	67.1596	67.8833	53.4494	2.69161
1462.74	39.9412	83.6652	29.3716	58.5907	67.6865	68.0618	53.441	2.70076
1463.71	40.0614	83.6426	30.2579	58.5097	68.4694	68.4652	53.4358	2.6805
1464.67	40.1843	83.6247	31.4658	58.4226	69.4154	69.019	53.4346	2.6932
1465.63	40.3101	83.6107	32.7847	58.3344	70.3685	69.5995	53.4383	2.76434
1466.6	40.4393	83.6	33.9592	58.2527	71.1484	70.0661	53.4472	2.86491
1467.56	40.5721	83.5924	34.7581	58.1856	71.596	70.2974	53.4609	2.92936
1468.53	40.7088	83.5879	35.0538	58.1394	71.6214	70.231	53.4792	2.89702
1469.49	40.8496	83.5871	34.8647	58.1185	71.2369	69.8866	53.5017	2.75071
1470.46	40.9943	83.5907	34.3451	58.1268	70.5689	69.3727	53.5284	2.52976
1471.42	41.1427	83.5996	33.7274	58.1658	69.8396	68.865	53.5597	2.31152
1472.38	41.2944	83.6144	33.2244	58.2321	69.2892	68.5422	53.5956	2.17445
1473.35	41.4486	83.6353	32.9513	58.3157	69.086	68.5199	53.6366	2.16424
1474.31	41.6052	83.6622	32.9057	58.4034	69.2887	68.8277	53.6827	2.27975
1475.28	41.7641	83.6946	32.9755	58.4822	69.8337	69.4026	53.7341	2.48158
1476.24	41.9253	83.7318	32.98	58.5428	70.5524	70.1064	53.7908	2.7143
1477.21	42.0891	83.773	32.7717	58.5842	71.2559	70.7921	53.8527	2.92901
1478.17	42.2557	83.8173	32.3249	58.6125	71.8258	71.3681	53.9197	3.09697
1479.13	42.4253	83.864	31.7491	58.6365	72.2296	71.8063	53.9914	3.21189
1480.1	42.5976	83.912	31.2425	58.662	72.4849	72.1137	54.0674	3.28344
1481.06	42.7723	83.9609	31.0294	58.6904	72.6252	72.31	54.1479	3.32627
1482.03	42.9485	84.0105	31.2973	58.719	72.6817	72.4159	54.2335	3.34866
1482.99	43.1256	84.0613	32.1534	58.743	72.6806	72.4523	54.3249	3.34559
1483.96	43.3031	84.114	33.6096	58.7585	72.6478	72.4433	54.4228	3.30041
1484.92	43.4806	84.1693	35.5972	58.7647	72.617	72.4219	54.5274	3.19658
1485.88	43.6583	84.2273	37.9919	58.7653	72.6324	72.4312	54.6381	3.03483
1486.85	43.8366	84.2874	40.6268	58.7679	72.7374	72.5135	54.7539	2.84487
1487.81	44.0156	84.3483	43.2966	58.7799	72.9511	72.6883	54.8735	2.68132
1488.78	44.1949	84.4086	45.7868	58.8055	73.2544	72.939	54.996	2.60158
1489.74	44.3738	84.4672	47.9222	58.8439	73.6013	73.2231	55.1207	2.63584
1490.7	44.5514	84.5236	49.6007	58.8914	73.9399	73.4925	55.2476	2.76691
1491.67	44.7272	84.5781	50.8137	58.9423	74.2301	73.7122	55.3768	2.93397
1492.63	44.9006	84.631	51.6491	58.9905	74.4611	73.8769	55.5086	3.06051
1493.6	45.0716	84.683	52.2531	59.0315	74.6531	74.0131	55.6428	3.09198
1494.56	45.2398	84.7342	52.7656	59.0615	74.8365	74.1572	55.7788	3.02282
1495.53	45.4047	84.7845	53.28	59.0774	75.0302	74.3303	55.9154	2.89871
1496.49	45.5654	84.8338	53.8342	59.0779	75.2359	74.5302	56.0517	2.79348
1497.45	45.7209	84.8821	54.4222	59.065	75.4446	74.7404	56.1868	2.77258
1498.42	45.8702	84.9296	55.0132	59.0445	75.6464	74.9446	56.3203	2.86044
1499.38	46.0122	84.9771	55.569	59.0251	75.8375	75.1357	56.4525	3.02574
1500.35	46.1467	85.0251	56.0553	59.0162	76.0195	75.3171	56.5843	3.19101
1501.31	46.2741	85.074	56.4506	59.0241	76.1952	75.4967	56.7164	3.26353
1502.28	46.3949	85.1238	56.7437	59.0487	76.3591	75.6724	56.849	3.17573
1503.24	46.5099	85.1737	56.9293	59.0831	76.4926	75.8223	56.9821	2.91837
1504.2	46.6197	85.223	57.0192	59.1152	76.5737	75.9154	57.1152	2.55073
1505.17	46.7243	85.271	57.0684	59.1362	76.6029	75.9444	57.2473	2.18123
1506.13	46.8237	85.3173	57.1559	59.1448	76.609	75.9377	57.3779	1.92521
1507.1	46.9174	85.3621	57.3387	59.1448	76.6257	75.9324	57.5065	1.8588
1508.06	47.0051	85.4058	57.6425	59.1426	76.6838	75.9616	57.6333	1.99
1509.03	47.0863	85.449	58.062	59.1457	76.8075	76.0497	57.7584	2.25977
1509.99	47.1608	85.4919	58.5419	59.1563	76.9945	76.1894	57.8821	2.57075
1510.95	47.228	85.5342	58.9986	59.1678	77.2125	76.3383	58.0042	2.8284
1511.92	47.2873	85.575	59.3697	59.171	77.4257	76.4531	58.1242	2.97477
1512.88	47.3377	85.6125	59.6249	59.1609	77.6067	76.5092	58.2409	3.00113
1513.85	47.3781	85.6453	59.7527	59.1388	77.7318	76.4974	58.3531	2.93728
1514.81	47.4073	85.6723	59.76	59.1125	77.7846	76.4214	58.4594	2.82686
1515.78	47.4243	85.6931	59.6727	59.0936	77.7626	76.2964	58.559	2.7039
1516.74	47.4286	85.7082	59.5335	59.0924	77.6812	76.1492	58.6514	2.58288
1517.7	47.4203	85.7181	59.3901	59.1138	77.5736	76.0144	58.7366	2.46513
1518.67	47.4004	85.7236	59.2803	59.1542	77.4844	75.929	58.8152	2.35329
1519.63	47.3708	85.7248	59.2184	59.2037	77.4544	75.9196	58.888	2.26095
1520.6	47.3344	85.7221	59.1925	59.2508	77.5057	75.992	58.9567	2.20936
1521.56	47.2946	85.7163	59.1761	59.2882	77.6349	76.1278	59.0237	2.21456
1522.52	47.2549	85.7083	59.1454	59.3144	77.8184	76.2906	59.0918	2.27656
1523.49	47.2175	85.6993	59.0921	59.3334	78.022	76.4376	59.1641	2.38029
1524.45	47.1833	85.6901	59.029	59.3516	78.2124	76.5349	59.2426	2.50712
1525.42	47.1509	85.6806	58.9845	59.3738	78.3693	76.5704	59.3277	2.64531
1526.38	47.1177	85.6699	58.9885	59.4013	78.4892	76.5554	59.418	2.78901
1527.35	47.0801	85.656	59.0607	59.431	78.5803	76.5138	59.5103	2.92699
1528.31	47.0344	85.6371	59.2054	59.4564	78.6564	76.4689	59.6005	3.03455
1529.27	46.9783	85.6115	59.4138	59.4689	78.7326	76.432	59.6844	3.0813
1530.24	46.9111	85.5786	59.6697	59.4618	78.8217	76.399	59.7588	3.05273
1531.2	46.8343	85.5394	59.9522	59.4341	78.9312	76.3556	59.8225	2.96778
1532.17	46.7507	85.4958	60.2349	59.3928	79.0583	76.2876	59.8765	2.87322
1533.13	46.6637	85.4504	60.4888	59.3499	79.193	76.1912	59.9235	2.81311
1534.1	46.576	85.4054	60.6901	59.3177	79.3251	76.0772	59.9671	2.79393
1535.06	46.4893	85.3621	60.824	59.3045	79.45	75.969	60.0107	2.77381
1536.02	46.4035	85.321	60.8871	59.309	79.573	75.8944	60.0561	2.6883
1536.99	46.318	85.2814	60.8828	59.3201	79.7065	75.8722	60.1035	2.49724
1537.95	46.2315	85.2425	60.8114	59.3244	79.8594	75.8978	60.1523	2.21993
1538.92	46.1436	85.2034	60.6624	59.3182	80.0167	75.9369	60.2013	1.93307
1539.88	46.0537	85.1633	60.4168	59.3082	80.1354	75.9373	60.2492	1.73257
1540.85	45.9622	85.1213	60.0627	59.3034	80.1668	75.8566	60.2954	1.68515
1541.81	45.8695	85.077	59.609	59.3111	80.0828	75.6821	60.3391	1.80042
1542.77	45.7764	85.0301	59.0913	59.3345	79.8857	75.435	60.3801	2.0364
1543.74	45.6837	84.9808	58.5656	59.3678	79.6126	75.168	60.4179	2.32808
1544.7	45.5923	84.9298	58.0928	59.3987	79.3295	74.9477	60.4526	2.61654
1545.67	45.503	84.8782	57.721	59.4196	79.1023	74.8248	60.4847	2.86273
1546.63	45.4163	84.8271	57.4694	59.4308	78.9703	74.8156	60.5148	3.04586
1547.59	45.3324	84.777	57.3251	59.4378	78.941	74.9026	60.5438	3.15744
1548.56	45.251	84.7277	57.2468	59.4475	78.9942	75.0451	60.5721	3.19971
1549.52	45.1719	84.6784	57.1783	59.4657	79.0913	75.1933	60.5999	3.18707
1550.49	45.0945	84.628	57.0671	59.4958	79.1889	75.3066	60.6267	3.14233
1551.45	45.0188	84.5755	56.8818	59.5377	79.2525	75.3662	60.6517	3.08362
1552.42	44.9454	84.5205	56.617	59.5896	79.267	75.3789	60.6745	3.0088
1553.38	44.875	84.4631	56.2861	59.6484	79.2369	75.3695	60.6949	2.89172
1554.34	44.8089	84.4036	55.9047	59.7101	79.1805	75.3645	60.7135	2.69911
1555.31	44.7482	84.3425	55.4772	59.7694	79.121	75.3755	60.731	2.4217
1556.27	44.6934	84.2805	55.013	59.8205	79.0834	75.3934	60.7483	2.09882
1557.24	44.645	84.218	54.5532	59.8584	79.0868	75.4008	60.766	1.81609
1558.2	44.603	84.1554	54.1452	59.8783	79.1245	75.3808	60.7845	1.6722
1559.17	44.5677	84.0928	53.8109	59.8775	79.1725	75.3231	60.8039	1.73175
1560.13	44.5392	84.03	53.559	59.8582	79.2117	75.2319	60.824	1.99202
1561.09	44.5174	83.9664	53.3802	59.828	79.2293	75.1251	60.8446	2.38284
1562.06	44.5024	83.9008	53.2257	59.7957	79.2176	75.0197	60.8652	2.7977
1563.02	44.4938	83.8324	53.0413	59.77	79.1885	74.9266	60.8851	3.13649
1563.99	44.4913	83.7603	52.8098	59.7575	79.1666	74.8524	60.9033	3.33785
1564.95	44.4946	83.6844	52.5391	59.7582	79.1654	74.7961	60.9192	3.39057
1565.92	44.5037	83.6048	52.2422	59.7651	79.18	74.748	60.9326	3.32716
1566.88	44.5189	83.522	51.9316	59.7668	79.1964	74.6943	60.9441	3.20829
1567.84	44.5404	83.437	51.6223	59.754	79.2027	74.6264	60.9545	3.10278
1568.81	44.5685	83.3502	51.3308	59.7241	79.1961	74.5451	60.9653	3.0641
1569.77	44.603	83.2624	51.0727	59.6809	79.1844	74.4617	60.9774	3.10788
1570.74	44.6438	83.1735	50.8562	59.6327	79.1816	74.3924	60.9915	3.20173
1571.7	44.691	83.0833	50.6751	59.5868	79.199	74.3491	61.0077	3.27953
1572.66	44.7442	82.9912	50.5037	59.5449	79.2374	74.3297	61.0254	3.27915
1573.63	44.8035	82.8961	50.3064	59.5032	79.2849	74.3154	61.044	3.18395
1574.59	44.8684	82.7968	50.0615	59.4586	79.3246	74.2808	61.0622	3.04018
1575.56	44.9383	82.6919	49.7812	59.4134	79.3437	74.207	61.0788	2.93475
1576.52	45.0125	82.5806	49.5063	59.3738	79.3376	74.0879	61.093	2.94502
1577.49	45.0907	82.4627	49.2928	59.346	79.3093	73.9295	61.1044	3.09312
1578.45	45.1733	82.3387	49.1962	59.3327	79.2668	73.7451	61.1139	3.33499
1579.41	45.2612	82.2095	49.251	59.3292	79.2156	73.5477	61.1225	3.58962
1580.38	45.3553	82.0761	49.4547	59.3244	79.1556	73.3436	61.1315	3.78628
1581.34	45.4564	81.9389	49.7751	59.3081	79.084	73.1372	61.142	3.89746
1582.31	45.565	81.798	50.1649	59.2766	79.0019	72.936	61.1542	3.93976
1583.27	45.6806	81.6531	50.5718	59.234	78.9162	72.7523	61.1678	3.9494
1584.24	45.8024	81.5037	50.9455	59.188	78.8372	72.5965	61.1826	3.95476
1585.2	45.9293	81.3494	51.2443	59.1463	78.7748	72.4708	61.1981	3.96457
1586.16	46.0604	81.1904	51.4397	59.1136	78.7336	72.3651	61.2142	3.97388
1587.13	46.1947	81.0266	51.5189	59.0894	78.7107	72.2595	61.2308	3.97679
1588.09	46.3316	80.8582	51.4807	59.0698	78.6971	72.1317	61.2476	3.9733
1589.06	46.4709	80.6846	51.3325	59.0496	78.683	71.9669	61.2646	3.96729
1590.02	46.6128	80.5051	51.0864	59.0237	78.6619	71.7624	61.2813	3.96109
1590.99	46.7576	80.3186	50.7583	58.9886	78.6326	71.5289	61.2978	3.9537
1591.95	46.9055	80.1242	50.367	58.9419	78.6002	71.2859	61.3141	3.94387
1592.91	47.0567	79.9218	49.9294	58.8834	78.5726	71.0558	61.3302	3.93394
1593.88	47.2109	79.7118	49.4549	58.8156	78.5571	70.855	61.3464	3.92989
1594.84	47.3677	79.4953	48.941	58.7431	78.5574	70.6889	61.363	3.93722
1595.81	47.5266	79.274	48.3747	58.6716	78.5716	70.549	61.3804	3.95634
1596.77	47.6877	79.0498	47.7373	58.6047	78.5923	70.4148	61.3995	3.98132
1597.73	47.8512	78.8244	47.0133	58.543	78.609	70.2612	61.4208	4.00277
1598.7	48.0176	78.5985	46.1972	58.4828	78.6115	70.0673	61.445	4.01301
1599.66	48.1873	78.372	45.2962	58.4176	78.5924	69.8249	61.472	4.01007
1600.63	48.3599	78.144	44.3281	58.341	78.549	69.5406	61.5011	3.99851
1601.59	48.5346	77.9133	43.3175	58.2493	78.4834	69.232	61.5311	3.98658
1602.56	48.7104	77.6791	42.2919	58.1424	78.4019	68.9202	61.5609	3.9809
1603.52	48.8861	77.4414	41.2807	58.0236	78.3144	68.6223	61.5895	3.98154
1604.48	49.0609	77.2011	40.3161	57.8967	78.2321	68.3462	61.6165	3.98122
1605.45	49.2344	76.9597	39.437	57.7644	78.1659	68.091	61.642	3.97063
1606.41	49.4068	76.7188	38.6898	57.6265	78.1238	67.8494	61.6662	3.94752
1607.38	49.5782	76.4796	38.1231	57.482	78.1084	67.613	61.6895	3.92257
1608.34	49.7488	76.2427	37.7764	57.3316	78.1165	67.3765	61.7122	3.9148
1609.31	49.9181	76.0083	37.6699	57.179	78.1419	67.1395	61.7346	3.93588
1610.27	50.0859	75.7762	37.8038	57.0301	78.1776	66.9044	61.757	3.97326
1611.23	50.2518	75.5465	38.1698	56.8882	78.2175	66.6717	61.78	3.98684
1612.2	50.4159	75.3199	38.7704	56.7504	78.255	66.4335	61.8041	3.92804
1613.16	50.5784	75.0973	39.6313	56.6042	78.281	66.1716	61.8302	3.77335
1614.13	50.7402	74.8797	40.7796	56.4338	78.2852	65.8658	61.8587	3.55027
1615.09	50.9023	74.6679	42.189	56.2315	78.2606	65.5117	61.8899	3.33346
1616.06	51.0657	74.4617	43.7507	56.0042	78.2085	65.1281	61.9235	3.20753
1617.02	51.2312	74.2606	45.3069	55.7683	78.1388	64.7494	61.9591	3.21752
1617.98	51.3989	74.064	46.7005	55.5431	78.0687	64.412	61.996	3.34016
1618.95	51.5683	73.871	47.8175	55.3421	78.0168	64.1381	62.0332	3.49737
1619.91	51.7386	73.6815	48.6273	55.165	77.9934	63.92	62.0701	3.60415
1620.88	51.9082	73.4956	49.181	55.0008	77.996	63.7212	62.1061	3.61834
1621.84	52.076	73.3136	49.5534	54.8395	78.0128	63.5005	62.1411	3.55898
1622.8	52.2412	73.1362	49.7936	54.681	78.0299	63.2369	62.1751	3.48374
1623.77	52.4033	72.9637	49.9194	54.5328	78.0385	62.9355	62.2084	3.44647
1624.73	52.5625	72.7966	49.9346	54.4038	78.0365	62.6206	62.2415	3.46748
1625.7	52.7191	72.6351	49.8439	54.2987	78.0268	62.3211	62.2747	3.53499
1626.66	52.8736	72.4794	49.6597	54.215	78.0128	62.0559	62.3079	3.62772
1627.63	53.0267	72.3294	49.4003	54.1465	77.9928	61.8258	62.3412	3.7326
1628.59	53.1788	72.1855	49.0827	54.0877	77.9611	61.6179	62.3741	3.84029
1629.55	53.3305	72.0479	48.718	54.038	77.9103	61.4162	62.4065	3.92654
1630.52	53.482	71.9172	48.3078	53.9995	77.836	61.2103	62.4385	3.9443
1631.48	53.6336	71.794	47.8425	53.9738	77.7372	60.997	62.4701	3.8438
1632.45	53.7855	71.6788	47.3049	53.9602	77.6184	60.7796	62.5016	3.61135
1633.41	53.9379	71.5715	46.6897	53.9571	77.491	60.5684	62.5334	3.29666
1634.38	54.0907	71.4719	46.0217	53.9648	77.3707	60.3787	62.5655	3.00247
1635.34	54.2434	71.3795	45.3449	53.984	77.2686	60.2221	62.598	2.83813
1636.3	54.3955	71.2941	44.6986	54.014	77.1888	60.1041	62.6308	2.86588
1637.27	54.5463	71.2155	44.1112	54.0541	77.1329	60.0267	62.6637	3.07373
1638.23	54.6953	71.1441	43.5916	54.1023	77.0984	59.9873	62.6964	3.38742
1639.2	54.8421	71.0801	43.1208	54.1551	77.0781	59.9785	62.7283	3.7068
1640.16	54.9863	71.0239	42.6698	54.2107	77.0631	59.9933	62.7591	3.94137
1641.13	55.1279	70.9755	42.221	54.2715	77.0428	60.0263	62.7885	4.03035
1642.09	55.2669	70.935	41.7614	54.3406	76.9979	60.068	62.8165	3.95104
1643.05	55.4036	70.9022	41.264	54.4216	76.9022	60.1038	62.8433	3.72427
1644.02	55.5387	70.8772	40.694	54.5164	76.743	60.1232	62.8695	3.41593
1644.98	55.6729	70.8603	40.0389	54.625	76.5409	60.13	62.8955	3.12221
1645.95	55.807	70.8516	39.3278	54.7445	76.344	60.1403	62.9215	2.93127
1646.91	55.9412	70.8516	38.6212	54.8704	76.2056	60.1743	62.9476	2.87584
1647.88	56.0756	70.8604	37.9916	54.9988	76.1673	60.2505	62.9733	2.90863
1648.84	56.2098	70.878	37.4986	55.127	76.2391	60.3763	62.9985	2.92617
1649.8	56.3434	70.9043	37.1564	55.2542	76.3811	60.5424	63.023	2.83478
1650.77	56.4763	70.9394	36.9356	55.3838	76.5195	60.7288	63.0466	2.61848
1651.73	56.6088	70.983	36.8023	55.5214	76.59	60.9173	63.0695	2.36183
1652.7	56.7413	71.035	36.7317	55.6669	76.5625	61.0911	63.092	2.20825
1653.66	56.8745	71.0954	36.7028	55.815	76.434	61.2366	63.1142	2.27796
1654.62	57.0091	71.1641	36.7091	55.9616	76.225	61.352	63.1367	2.59684
1655.59	57.1454	71.2411	36.7553	56.1052	75.9737	61.4458	63.1597	3.07898
1656.55	57.2834	71.3265	36.8387	56.2455	75.7117	61.5318	63.1833	3.57047
1657.52	57.4227	71.4203	36.9566	56.3854	75.4481	61.6272	63.2075	3.92544
1658.48	57.5625	71.5227	37.1208	56.5298	75.1746	61.7479	63.2318	4.07092
1659.45	57.7024	71.6336	37.3462	56.679	74.8747	61.8993	63.2558	4.0292
1660.41	57.8419	71.7532	37.6354	56.8284	74.5336	62.0732	63.2789	3.89263
1661.37	57.9809	71.881	37.9736	56.9726	74.1477	62.2538	63.3005	3.76932
1662.34	58.1197	72.0164	38.3349	57.1078	73.7266	62.4254	63.32	3.72858
1663.3	58.2582	72.1583	38.6931	57.2338	73.2881	62.5803	63.3372	3.7718
1664.27	58.397	72.3059	39.0308	57.3547	72.848	62.7223	63.352	3.84085
1665.23	58.5361	72.4583	39.3473	57.4763	72.4069	62.8674	63.3649	3.85796
1666.2	58.6762	72.6151	39.6617	57.6051	71.9458	63.0387	63.3768	3.77452
1667.16	58.8177	72.7766	40.0036	57.7454	71.4374	63.2542	63.3887	3.60118
1668.12	58.9613	72.9431	40.3917	57.8973	70.865	63.5117	63.4019	3.40108
1669.09	59.1073	73.1153	40.8212	58.0562	70.2304	63.7858	63.4174	3.25102
1670.05	59.2557	73.2936	41.2698	58.2158	69.5457	64.0384	63.4356	3.19579
1671.02	59.4063	73.4781	41.7139	58.3713	68.8218	64.2356	63.4564	3.22588
1671.98	59.5587	73.6683	42.1425	58.5222	68.0591	64.3616	63.479	3.29267
1672.95	59.7126	73.8628	42.5669	58.6715	67.2481	64.4304	63.5024	3.34861
1673.91	59.8674	74.0601	43.0158	58.8235	66.3858	64.4814	63.5253	3.38219
1674.87	60.0228	74.2583	43.5158	58.9798	65.4934	64.5596	63.5467	3.42163
1675.84	60.1782	74.4564	44.075	59.1371	64.6174	64.6942	63.5662	3.50446
1676.8	60.3332	74.6541	44.6846	59.291	63.8118	64.8936	63.5837	3.63573
1677.77	60.4879	74.852	45.3311	59.4387	63.1191	65.148	63.6	3.76722
1678.73	60.6425	75.051	46.0117	59.5818	62.5536	65.4369	63.616	3.81582
1679.69	60.7979	75.252	46.7473	59.7263	62.095	65.7376	63.6329	3.7123
1680.66	60.9551	75.4553	47.5824	59.88	61.7044	66.0314	63.6514	3.44966
1681.62	61.1151	75.6605	48.5562	60.0469	61.3484	66.3034	63.6726	3.09883
1682.59	61.2787	75.8672	49.6549	60.2238	61.0176	66.5431	63.6967	2.78007
1683.55	61.4461	76.0751	50.7991	60.4006	60.7272	66.7451	63.724	2.60645
1684.52	61.6172	76.2841	51.8858	60.5677	60.5096	66.9126	63.7546	2.633
1685.48	61.7919	76.4939	52.8283	60.7199	60.4067	67.0587	63.7881	2.83962
1686.44	61.9696	76.7042	53.5763	60.8583	60.4556	67.201	63.8243	3.15234
1687.41	62.1498	76.9145	54.1398	60.9887	60.6713	67.3542	63.8627	3.48383
1688.37	62.3317	77.1241	54.5814	61.1192	61.0421	67.5238	63.9028	3.76621
1689.34	62.5147	77.332	54.9662	61.2543	61.5371	67.7064	63.9435	3.9609
1690.3	62.6981	77.5378	55.3255	61.3924	62.1198	67.8946	63.9843	4.0505
1691.27	62.8813	77.7409	55.6594	61.528	62.7587	68.0853	64.0242	4.02852
1692.23	63.0644	77.9412	55.9554	61.6566	63.4374	68.2824	64.0633	3.89821
1693.19	63.2476	78.139	56.2039	61.7761	64.1519	68.4959	64.1017	3.67792
1694.16	63.4313	78.3345	56.4045	61.8886	64.8972	68.7322	64.14	3.4027
1695.12	63.616	78.5281	56.5642	61.9991	65.6536	68.9869	64.179	3.11624
1696.09	63.8016	78.72	56.6921	62.1133	66.3854	69.2457	64.2188	2.85817
1697.05	63.9879	78.9105	56.7949	62.2351	67.0531	69.4918	64.2594	2.65697
1698.02	64.1744	79.0997	56.876	62.3634	67.6265	69.716	64.3004	2.53201
1698.98	64.3602	79.2877	56.9352	62.4906	68.0892	69.9176	64.341	2.498
1699.94	64.5448	79.4743	56.9706	62.6059	68.4367	70.1032	64.3807	2.56245
1700.91	64.7275	79.6593	56.984	62.7004	68.6695	70.2816	64.4192	2.71573
1701.87	64.9076	79.842	56.9813	62.7713	68.7849	70.4592	64.4563	2.92459
1702.84	65.0849	80.0218	56.9708	62.8239	68.7759	70.6375	64.492	3.14081
1703.8	65.2594	80.1981	56.9599	62.8704	68.6407	70.8165	64.5263	3.32384
1704.76	65.4318	80.3708	56.9526	62.9237	68.3932	70.9984	64.5594	3.46203
1705.73	65.6027	80.5403	56.9479	62.9913	68.0584	71.1861	64.5916	3.57507
1706.69	65.7728	80.7074	56.9415	63.0727	67.66	71.3795	64.6235	3.69411
1707.66	65.9427	80.8734	56.9293	63.1617	67.2107	71.5741	64.6554	3.83399
1708.62	66.1124	81.0389	56.9102	63.2503	66.7071	71.7625	64.688	3.97785
1709.59	66.2821	81.2044	56.886	63.3317	66.1344	71.936	64.7213	4.08361
1710.55	66.4517	81.3696	56.8582	63.4023	65.4729	72.0869	64.7553	4.10536
1711.51	66.6209	81.5337	56.8236	63.4611	64.7073	72.209	64.7899	4.01435
1712.48	66.7895	81.6959	56.7737	63.5089	63.8269	72.299	64.8244	3.80994
1713.44	66.9565	81.8549	56.6979	63.5485	62.8211	72.3589	64.8585	3.52079
1714.41	67.1214	82.0101	56.5956	63.5865	61.6806	72.4002	64.8914	3.20093
1715.37	67.2835	82.1611	56.4806	63.6319	60.4179	72.4406	64.9229	2.92145
1716.34	67.4425	82.308	56.3742	63.6919	59.0872	72.4955	64.9528	2.75399
1717.3	67.5983	82.4513	56.2925	63.7681	57.7779	72.5734	64.9813	2.74658
1718.26	67.7512	82.5914	56.2463	63.8573	56.5933	72.6766	65.0086	2.90141
1719.23	67.9016	82.7289	56.2405	63.9528	55.6325	72.8038	65.0349	3.16968
1720.19	68.0496	82.8642	56.273	64.0455	54.9641	72.9509	65.0605	3.4706
1721.16	68.1957	82.9974	56.3404	64.1287	54.6088	73.115	65.0852	3.7259
1722.12	68.34	83.1285	56.4449	64.1998	54.5516	73.2942	65.1091	3.89029
1723.09	68.4825	83.2574	56.5867	64.2585	54.7694	73.4807	65.132	3.96122
1724.05	68.6235	83.384	56.756	64.3051	55.242	73.6593	65.1539	3.96604
1725.01	68.7631	83.5085	56.9344	64.3404	55.9509	73.8119	65.1752	3.93807
1725.98	68.9018	83.6312	57.1028	64.3667	56.8708	73.9245	65.1963	3.89653
1726.94	69.0401	83.7526	57.2509	64.3886	57.9678	73.9921	65.2179	3.83884
1727.91	69.1784	83.8727	57.3813	64.4116	59.204	74.0197	65.2402	3.7456
1728.87	69.3168	83.9911	57.5093	64.4406	60.5533	74.0221	65.2632	3.59437
1729.83	69.4547	84.107	57.6585	64.4784	62.0201	74.0239	65.2861	3.37726
1730.8	69.5914	84.2191	57.8541	64.5271	63.6413	74.0581	65.3079	3.11548
1731.76	69.7258	84.3266	58.1097	64.5867	65.4467	74.1562	65.3276	2.86174
1732.73	69.8571	84.4288	58.4159	64.6554	67.4014	74.3311	65.3441	2.6841
1733.69	69.9847	84.5261	58.7416	64.7283	69.3974	74.5688	65.3573	2.63523
1734.66	70.1083	84.6193	59.0517	64.7996	71.2936	74.8379	65.3675	2.72335
1735.62	70.2279	84.7094	59.3184	64.8641	72.9561	75.1003	65.3753	2.90464
1736.58	70.3436	84.7972	59.5273	64.9169	74.3	75.323	65.3815	3.10484
1737.55	70.4557	84.8834	59.6788	64.9554	75.3243	75.4922	65.3868	3.25825
1738.51	70.5644	84.9683	59.781	64.981	76.0858	75.6146	65.3916	3.33948
1739.48	70.6704	85.0517	59.837	64.9988	76.6363	75.7023	65.3959	3.36851
1740.44	70.7741	85.1335	59.8415	65.0153	76.9888	75.7611	65.3996	3.38862
1741.41	70.8761	85.2134	59.7912	65.0378	77.1295	75.7892	65.4026	3.43451
1742.37	70.9767	85.2913	59.693	65.0713	77.0426	75.7834	65.4049	3.5115
1743.33	71.076	85.367	59.566	65.1175	76.7287	75.7451	65.4065	3.59556
1744.3	71.1737	85.4405	59.4359	65.1732	76.2082	75.6841	65.4075	3.64993
1745.26	71.2694	85.512	59.3261	65.2322	75.5135	75.6188	65.4081	3.64605
1746.23	71.3626	85.5816	59.2529	65.2886	74.6786	75.574	65.4085	3.57899
1747.19	71.4529	85.6494	59.2266	65.3398	73.7411	75.5735	65.4087	3.47252
1748.16	71.5402	85.7156	59.2495	65.3872	72.7497	75.6306	65.4089	3.37272
1749.12	71.6244	85.78	59.3143	65.4336	71.7665	75.741	65.409	3.33116
1750.08	71.7056	85.8426	59.4057	65.4814	70.8576	75.8842	65.4091	3.38277
1751.05	71.7841	85.9033	59.5058	65.5317	70.0812	76.0313	65.4089	3.52821
1752.01	71.86	85.9623	59.6022	65.5845	69.4778	76.1546	65.4085	3.73173
1752.98	71.9334	86.0198	59.6928	65.6394	69.0644	76.2364	65.4076	3.93787
1753.94	72.0045	86.0758	59.7897	65.6962	68.8388	76.2737	65.4063	4.09791
1754.9	72.0732	86.1305	59.9143	65.7545	68.79	76.2762	65.4046	4.18978
1755.87	72.1399	86.1838	60.0871	65.8126	68.9064	76.2602	65.4026	4.21984
1756.83	72.2053	86.2357	60.3184	65.8672	69.1786	76.2445	65.4006	4.20927
1757.8	72.27	86.2865	60.6063	65.9155	69.5998	76.2484	65.3989	4.17837
1758.76	72.3347	86.3362	60.9385	65.9567	70.1646	76.2883	65.3978	4.14118
1759.73	72.3997	86.3852	61.2942	65.9932	70.8635	76.3708	65.3973	4.11047
1760.69	72.4647	86.4332	61.6482	66.0285	71.676	76.4884	65.3973	4.10271
1761.65	72.5289	86.4802	61.9761	66.065	72.5679	76.6202	65.3975	4.13369
1762.62	72.5915	86.5256	62.2611	66.102	73.4959	76.7397	65.3976	4.20601
1763.58	72.6516	86.5693	62.4986	66.1359	74.4184	76.8253	65.3973	4.29969
1764.55	72.709	86.6111	62.697	66.1625	75.3042	76.8681	65.3966	4.37606
1765.51	72.7639	86.6512	62.874	66.1796	76.1402	76.8742	65.3955	4.3943
1766.48	72.8168	86.6897	63.0484	66.1886	76.9267	76.8599	65.3944	4.33011
1767.44	72.8685	86.7272	63.2332	66.1943	77.6699	76.8429	65.3937	4.18522
1768.4	72.9198	86.764	63.4351	66.2034	78.3737	76.8364	65.3937	3.98555
1769.37	72.9712	86.8006	63.6572	66.2209	79.0406	76.8483	65.3946	3.77295
1770.33	73.0232	86.8374	63.9025	66.2486	79.672	76.8821	65.3965	3.59655
1771.3	73.0755	86.8745	64.1695	66.2843	80.2659	76.9368	65.3992	3.5035
1772.26	73.1278	86.9119	64.4484	66.3224	80.8144	77.0075	65.4025	3.52634
1773.23	73.1796	86.9492	64.7232	66.3574	81.3053	77.0858	65.4059	3.6682
1774.19	73.2306	86.9858	64.9748	66.3855	81.7261	77.1616	65.4093	3.89484
1775.15	73.2806	87.0212	65.1857	66.4062	82.0678	77.2248	65.4125	4.14334
1776.12	73.3299	87.0547	65.3465	66.4226	82.3317	77.2679	65.4157	4.34771
1777.08	73.3787	87.0862	65.4604	66.439	82.5319	77.2888	65.4193	4.46802
1778.05	73.4276	87.1157	65.5406	66.46	82.6909	77.2913	65.4236	4.50497
1779.01	73.4767	87.1435	65.6054	66.4879	82.8321	77.2828	65.4291	4.49091
1779.97	73.5263	87.1701	65.675	66.5232	82.9758	77.2732	65.4361	4.46542
1780.94	73.5766	87.1961	65.7671	66.564	83.1356	77.2721	65.4449	4.45407
1781.9	73.6276	87.2218	65.8921	66.6075	83.3149	77.2863	65.4557	4.46347
1782.87	73.6792	87.2471	66.0473	66.6504	83.504	77.317	65.4687	4.49091
1783.83	73.7311	87.2718	66.2167	66.6895	83.6821	77.3588	65.4835	4.53436
1784.8	73.7832	87.2955	66.3776	66.7236	83.8254	77.4026	65.4998	4.59128
1785.76	73.8353	87.3176	66.5121	66.7524	83.9185	77.4407	65.5169	4.64809
1786.72	73.8872	87.3379	66.6151	66.778	83.9625	77.4702	65.534	4.67394
1787.69	73.9394	87.3562	66.6966	66.802	83.9776	77.4958	65.5509	4.63097
1788.65	73.9921	87.3728	66.7775	66.8261	83.9973	77.5286	65.5674	4.49912
1789.62	74.0457	87.3884	66.8796	66.8509	84.055	77.5817	65.5837	4.29846
1790.58	74.1007	87.4037	67.0148	66.8756	84.1677	77.6629	65.6005	4.09022
1791.55	74.1574	87.4196	67.1773	66.8986	84.3281	77.7692	65.6187	3.95087
1792.51	74.216	87.4365	67.3481	66.9177	84.511	77.8889	65.6392	3.93305
1793.47	74.2769	87.4548	67.5062	66.9322	84.6869	78.0068	65.663	4.03713
1794.44	74.3401	87.4743	67.6371	66.9435	84.8331	78.1103	65.6906	4.21112
1795.4	74.4059	87.4947	67.7356	66.9541	84.942	78.1937	65.7222	4.37856
1796.37	74.474	87.5158	67.807	66.9677	85.0207	78.2591	65.7577	4.47735
1797.33	74.5439	87.5374	67.8607	66.9862	85.0827	78.3123	65.7965	4.48746
1798.3	74.6151	87.5595	67.9026	67.0089	85.1381	78.3568	65.8381	4.43422
1799.26	74.6866	87.5818	67.933	67.0323	85.1906	78.3907	65.8816	4.36919
1800.22	74.7576	87.604	67.9501	67.0518	85.2412	78.4103	65.9263	4.34211
1801.19	74.8273	87.6254	67.9567	67.0658	85.2923	78.4129	65.9711	4.37892
1802.15	74.8951	87.6454	67.9611	67.0768	85.3481	78.4011	66.0152	4.47472
1803.12	74.9608	87.6637	67.9737	67.0903	85.4115	78.3813	66.0578	4.6009
1804.08	75.0241	87.6803	68.0024	67.1125	85.4804	78.3613	66.0986	4.71978
1805.05	75.0853	87.6954	68.0463	67.1461	85.5456	78.3462	66.1373	4.79919
1806.01	75.1445	87.7095	68.097	67.1874	85.5934	78.3366	66.1743	4.82243
1806.97	75.202	87.7235	68.1417	67.2288	85.6126	78.329	66.2102	4.79226
1807.94	75.2579	87.7375	68.1714	67.2614	85.6008	78.3208	66.2456	4.72909
1808.9	75.3126	87.7519	68.186	67.2805	85.5664	78.312	66.2808	4.66385
1809.87	75.3659	87.7665	68.1941	67.2869	85.5259	78.3067	66.3162	4.62697
1810.83	75.4179	87.7809	68.2091	67.2861	85.4956	78.3096	66.3518	4.63643
1811.79	75.4687	87.795	68.2416	67.285	85.4847	78.3227	66.3872	4.69023
1812.76	75.5182	87.8086	68.2935	67.2888	85.4918	78.3425	66.4221	4.76798
1813.72	75.5665	87.8216	68.3554	67.299	85.5076	78.3609	66.4561	4.84202
1814.69	75.6135	87.8342	68.4107	67.3135	85.5208	78.3695	66.4888	4.8924
1815.65	75.6593	87.8463	68.4442	67.329	85.5266	78.3649	66.5199	4.91638
1816.62	75.7039	87.8578	68.4496	67.343	85.529	78.3511	66.5494	4.926
1817.58	75.7472	87.8688	68.4326	67.3537	85.538	78.3374	66.5772	4.93517
1818.54	75.7893	87.8792	68.4082	67.3612	85.5633	78.3333	66.6036	4.94602
1819.51	75.8303	87.8892	68.3941	67.3665	85.6086	78.3438	66.629	4.94513
1820.47	75.8701	87.8987	68.4019	67.3717	85.6695	78.3677	66.6539	4.91325
1821.44	75.9086	87.9076	68.4322	67.3795	85.7364	78.4002	66.6788	4.84097
1822.4	75.9458	87.9158	68.4746	67.3925	85.7999	78.4377	66.7037	4.73784
1823.37	75.9817	87.9233	68.5131	67.4125	85.8549	78.4792	66.7288	4.62702
1824.33	76.0165	87.9299	68.5327	67.4383	85.901	78.5264	66.7538	4.52969
1825.29	76.0505	87.9357	68.5225	67.4675	85.94	78.5775	66.7783	4.45222
1826.26	76.0836	87.9407	68.478	67.4963	85.9737	78.6255	66.8019	4.38734
1827.22	76.1161	87.9449	68.4013	67.522	86.004	78.6586	66.8244	4.3284
1828.19	76.1479	87.9484	68.3015	67.5435	86.0349	78.6669	66.8457	4.28411
1829.15	76.179	87.9515	68.1946	67.5616	86.074	78.65	66.8659	4.2792
1830.12	76.2096	87.9548	68.1008	67.5778	86.1305	78.6171	66.8853	4.33789
1831.08	76.2396	87.9586	68.0392	67.593	86.2108	78.5841	66.9044	4.46213
1832.04	76.2691	87.9631	68.0217	67.6076	86.3141	78.5639	66.9233	4.62253
1833.01	76.2979	87.9683	68.0466	67.6214	86.4312	78.5597	66.9422	4.7716
1833.97	76.3259	87.9738	68.0973	67.6346	86.5459	78.5636	66.961	4.87108
1834.94	76.3529	87.979	68.1497	67.6483	86.6429	78.5617	66.9794	4.91344
1835.9	76.3788	87.9831	68.1846	67.6633	86.7138	78.5446	66.9972	4.92113
1836.86	76.4035	87.986	68.1967	67.6804	86.7584	78.5127	67.014	4.9237
1837.83	76.4272	87.9875	68.198	67.6997	86.7833	78.4762	67.0298	4.93052
1838.79	76.45	87.9878	68.212	67.7202	86.7973	78.4494	67.0442	4.9204
1839.76	76.4717	87.9872	68.2636	67.7403	86.8083	78.4446	67.0572	4.85704
1840.72	76.4925	87.9857	68.3662	67.7583	86.8221	78.4664	67.0688	4.7196
1841.69	76.5123	87.9836	68.514	67.7728	86.8432	78.5105	67.0791	4.52618
1842.65	76.5308	87.9805	68.6846	67.7839	86.8753	78.5664	67.0883	4.33263
1843.61	76.5477	87.9764	68.8457	67.7925	86.9196	78.6204	67.0967	4.20637
1844.58	76.563	87.971	68.9695	67.8007	86.9738	78.6608	67.1045	4.19209
1845.54	76.5766	87.9643	69.041	67.811	87.034	78.6806	67.1117	4.29056
1846.51	76.5885	87.9566	69.0615	67.8251	87.0952	78.6789	67.118	4.46236
1847.47	76.5991	87.9482	69.0453	67.8434	87.153	78.6599	67.1233	4.65133
1848.44	76.6084	87.9396	69.0115	67.8645	87.2047	78.631	67.1274	4.81165
1849.4	76.6168	87.9312	68.9766	67.8863	87.2491	78.5997	67.1303	4.92316
1850.36	76.6244	87.9232	68.9488	67.9062	87.2847	78.571	67.1326	4.98949
1851.33	76.6313	87.9159	68.9284	67.9226	87.3088	78.5464	67.1349	5.02556
1852.29	76.6378	87.9093	68.9103	67.9348	87.3195	78.5243	67.1379	5.04495
1853.26	76.6442	87.9033	68.8868	67.9441	87.3187	78.5018	67.1418	5.05463
1854.22	76.6506	87.8977	68.8508	67.9523	87.3118	78.4744	67.1467	5.05662
1855.19	76.6573	87.8924	68.796	67.9617	87.3047	78.4381	67.1522	5.05205
1856.15	76.6639	87.8872	68.7191	67.9738	87.3013	78.3906	67.1579	5.04328
1857.11	76.6701	87.8818	68.6218	67.9888	87.3013	78.3345	67.1636	5.0335
1858.08	76.6755	87.8761	68.5112	68.0054	87.3024	78.2784	67.1692	5.02595
1859.04	76.6798	87.87	68.3998	68.0213	87.304	78.2358	67.1748	5.02346
1860.01	76.6832	87.8637	68.3003	68.0346	87.3084	78.2194	67.1809	5.02751
1860.97	76.6861	87.8575	68.2222	68.0446	87.3204	78.2344	67.1878	5.03515
1861.93	76.6893	87.8518	68.1692	68.0522	87.3418	78.2739	67.1954	5.03518
1862.9	76.6933	87.8468	68.1394	68.0606	87.37	78.3195	67.2039	5.00798
1863.86	76.6986	87.8426	68.1291	68.0731	87.3962	78.3493	67.2127	4.93278
1864.83	76.7051	87.8392	68.1358	68.0918	87.4113	78.3487	67.2215	4.80129
1865.79	76.7121	87.8358	68.1597	68.1159	87.4119	78.3192	67.2297	4.62981
1866.76	76.719	87.8317	68.1993	68.1428	87.4037	78.2772	67.2365	4.46029
1867.72	76.7248	87.826	68.246	68.1688	87.3975	78.2433	67.2416	4.34628
1868.68	76.7289	87.8181	68.2843	68.1917	87.4024	78.23	67.2447	4.32913
1869.65	76.7314	87.8077	68.2995	68.2117	87.4209	78.2362	67.2461	4.41773
1870.61	76.7324	87.7953	68.2856	68.2302	87.448	78.2504	67.2465	4.58345
1871.58	76.7328	87.7817	68.2499	68.2494	87.4735	78.2574	67.2467	4.77387
1872.54	76.7332	87.7677	68.2122	68.2697	87.4877	78.2486	67.2477	4.93694
1873.51	76.7342	87.7542	68.1957	68.2902	87.4867	78.2276	67.2499	5.04221
1874.47	76.7358	87.7414	68.2143	68.3089	87.4745	78.2052	67.2535	5.08825
1875.43	76.738	87.7295	68.2667	68.3248	87.46	78.1921	67.2581	5.09455
1876.4	76.7404	87.7181	68.3396	68.3389	87.454	78.1937	67.2632	5.08551
1877.36	76.7432	87.7071	68.4171	68.3534	87.4657	78.2083	67.2687	5.077
1878.33	76.7465	87.6966	68.4883	68.3702	87.4981	78.2296	67.2744	5.07255
1879.29	76.7508	87.6868	68.5499	68.3896	87.5464	78.2497	67.2806	5.0686
1880.26	76.7568	87.678	68.6032	68.4095	87.5973	78.2609	67.2878	5.06245
1881.22	76.7648	87.6704	68.6492	68.4263	87.6345	78.2581	67.2961	5.05592
1882.18	76.7746	87.6641	68.6864	68.4377	87.6454	78.2401	67.3057	5.05225
1883.15	76.786	87.6589	68.7117	68.443	87.6266	78.2092	67.3163	5.04991
1884.11	76.7983	87.6545	68.7229	68.4445	87.5846	78.1711	67.3277	5.0398
1885.08	76.8109	87.6503	68.7199	68.4456	87.5318	78.1316	67.3395	5.00989
1886.04	76.823	87.6461	68.7047	68.4492	87.4799	78.095	67.3516	4.95492
1887	76.8342	87.6413	68.6799	68.4563	87.4357	78.0627	67.3637	4.88391
1887.97	76.8444	87.636	68.6488	68.4663	87.4015	78.0346	67.3759	4.81863
1888.93	76.8538	87.6303	68.6162	68.4776	87.3787	78.0115	67.388	4.7825
1889.9	76.8632	87.6242	68.5899	68.4896	87.371	77.996	67.4	4.78682
1890.86	76.8731	87.618	68.5789	68.5023	87.3832	77.9909	67.4121	4.82399
1891.83	76.884	87.6118	68.59	68.5165	87.4172	77.9963	67.4243	4.87286
1892.79	76.896	87.6056	68.6234	68.5323	87.468	78.0062	67.4368	4.91247
1893.75	76.9087	87.5992	68.6714	68.5489	87.5222	78.0095	67.4498	4.9344
1894.72	76.9215	87.5926	68.7208	68.5636	87.5641	77.995	67.4633	4.94536
1895.68	76.934	87.5857	68.7596	68.5741	87.5836	77.9579	67.4774	4.95907
1896.65	76.946	87.5786	68.7819	68.5793	87.5817	77.9047	67.4921	4.98454
1897.61	76.9578	87.5714	68.7909	68.5806	87.5706	77.8509	67.5073	5.01945
1898.58	76.9697	87.5644	68.796	68.5812	87.5673	77.8156	67.5228	5.05289
1899.54	76.9824	87.5578	68.808	68.5854	87.5844	77.812	67.5384	5.07392
1900.5	76.9961	87.5518	68.8321	68.5956	87.6239	77.8415	67.5543	5.07898
1901.47	77.0113	87.5464	68.8667	68.6123	87.6768	77.8935	67.5704	5.07261
1902.43	77.0278	87.5416	68.9039	68.633	87.7292	77.9509	67.5869	5.0622
1903.4	77.0455	87.5373	68.9351	68.6543	87.7699	77.9995	67.604	5.0514
1904.36	77.0641	87.5332	68.9554	68.6728	87.797	78.0337	67.6218	5.0375
1905.33	77.0833	87.529	68.9665	68.6877	87.8179	78.0571	67.6406	5.01456
1906.29	77.1032	87.5249	68.9747	68.7002	87.8439	78.0769	67.6603	4.97989
1907.25	77.1236	87.5206	68.987	68.7137	87.8829	78.0964	67.6809	4.93922
1908.22	77.1448	87.5165	69.006	68.7307	87.9339	78.1108	67.7024	4.90653
1909.18	77.1668	87.5127	69.0279	68.7515	87.9857	78.1102	67.7244	4.89753
1910.15	77.1894	87.5093	69.0452	68.774	88.0228	78.0857	67.7469	4.91986
1911.11	77.2124	87.5062	69.052	68.7945	88.0336	78.0373	67.7699	4.96557
1912.08	77.2352	87.5035	69.0491	68.8105	88.0167	77.9762	67.7934	5.0115
1913.04	77.2578	87.5009	69.0439	68.8217	87.9825	77.921	67.8175	5.0293
1914	77.2799	87.4984	69.047	68.8308	87.9495	77.8896	67.842	5.0005
1914.97	77.3017	87.496	69.0652	68.8415	87.9353	77.8905	67.8668	4.92793
1915.93	77.3234	87.4934	69.0935	68.8555	87.9484	77.919	67.8915	4.83558
1916.9	77.345	87.4904	69.1156	68.8718	87.9839	77.9601	67.9154	4.75611
1917.86	77.3665	87.4868	69.1097	68.8868	88.0256	77.994	67.938	4.71349
1918.82	77.388	87.4826	69.0593	68.8975	88.055	78.003	67.9594	4.71208
1919.79	77.4094	87.4778	68.963	68.903	88.0587	77.9768	67.9796	4.7387
1920.75	77.4309	87.4729	68.8383	68.9066	88.0362	77.9166	67.9995	4.77525
1921.72	77.4526	87.4683	68.7185	68.9134	88.0008	77.8354	68.0195	4.81162
1922.68	77.4745	87.4639	68.6425	68.9284	87.9741	77.7567	68.04	4.84959
1923.65	77.4966	87.4598	68.642	68.9527	87.9778	77.7086	68.0613	4.89618
1924.61	77.5187	87.4557	68.7325	68.983	88.0256	77.7151	68.0831	4.95322
1925.57	77.5411	87.4511	68.9097	69.0128	88.1197	77.7874	68.1049	5.01242
1926.54	77.5637	87.446	69.1514	69.0356	88.2494	77.9179	68.1267	5.05975
1927.5	77.5868	87.4403	69.4231	69.048	88.3946	78.0791	68.1484	5.08499
1928.47	77.6104	87.4343	69.6867	69.0511	88.5305	78.2328	68.17	5.08829
1929.43	77.6344	87.428	69.9091	69.0503	88.6338	78.3428	68.1915	5.07903
1930.4	77.6583	87.4215	70.0696	69.0516	88.689	78.3884	68.2129	5.06865
1931.36	77.6819	87.4149	70.1628	69.0595	88.6928	78.3699	68.2342	5.06397
1932.32	77.7048	87.408	70.1983	69.0746	88.6539	78.3067	68.2553	5.06567
1933.29	77.7273	87.401	70.1958	69.0945	88.5905	78.2271	68.2763	5.07152
1934.25	77.7496	87.3937	70.1773	69.1163	88.5225	78.1549	68.2972	5.07976
1935.22	77.7723	87.3863	70.1599	69.1382	88.465	78.1018	68.3183	5.08878
1936.18	77.7956	87.3788	70.1526	69.1604	88.4237	78.0661	68.3398	5.09393
1937.14	77.8194	87.3711	70.1556	69.1839	88.3965	78.0379	68.3615	5.08581
1938.11	77.8434	87.3633	70.1638	69.2079	88.3766	78.0074	68.3835	5.05387
1939.07	77.8671	87.3553	70.1714	69.229	88.3591	77.972	68.4055	4.9941
1940.04	77.8902	87.3471	70.1742	69.2421	88.3444	77.9376	68.4275	4.9154
1941	77.9126	87.339	70.1727	69.2441	88.3382	77.9141	68.4493	4.83889
1941.97	77.9344	87.3308	70.1695	69.2362	88.3479	77.909	68.4711	4.78908
1942.93	77.9562	87.3227	70.1672	69.2246	88.3782	77.9214	68.4927	4.78187
1943.89	77.9782	87.3147	70.1653	69.218	88.4282	77.9416	68.5142	4.81695
1944.86	78.0009	87.3064	70.1582	69.2229	88.4909	77.9545	68.5355	4.87909
1945.82	78.024	87.2977	70.1371	69.2412	88.5561	77.9471	68.5566	4.94702
1946.79	78.0473	87.2882	70.0931	69.2685	88.6145	77.9159	68.5775	5.00369
1947.75	78.0704	87.278	70.0231	69.2968	88.6613	77.8697	68.598	5.04177
1948.72	78.093	87.2669	69.9325	69.3186	88.6966	77.8252	68.618	5.06258
1949.68	78.115	87.2553	69.834	69.3302	88.7237	77.799	68.6375	5.07109
1950.64	78.1361	87.2435	69.7437	69.3328	88.7456	77.7983	68.6565	5.07156
1951.61	78.1563	87.2317	69.675	69.3312	88.7629	77.8179	68.675	5.06643
1952.57	78.1754	87.2199	69.6355	69.331	88.7738	77.8418	68.6934	5.0577
1953.54	78.1936	87.2083	69.6257	69.3354	88.7764	77.8522	68.712	5.04814
1954.5	78.211	87.1964	69.6406	69.3445	88.7706	77.8382	68.7309	5.04076
1955.47	78.228	87.1843	69.6727	69.3555	88.759	77.7998	68.7502	5.03725
1956.43	78.2451	87.1719	69.7151	69.3648	88.746	77.7472	68.7698	5.0373
1957.39	78.2625	87.1591	69.7635	69.3702	88.7361	77.6955	68.789	5.03955
1958.36	78.2803	87.1458	69.8179	69.3723	88.7327	77.6578	68.8074	5.04309
1959.32	78.2981	87.132	69.8821	69.3742	88.7387	77.6419	68.8247	5.04766
1960.29	78.3154	87.1173	69.962	69.3787	88.7561	77.6486	68.8406	5.05201
1961.25	78.3316	87.1015	70.0611	69.3881	88.7852	77.6728	68.8555	5.05218
1962.22	78.3464	87.0845	70.1752	69.4018	88.8229	77.7044	68.8696	5.04217
1963.18	78.3599	87.0665	70.2902	69.4186	88.8612	77.7301	68.8835	5.01769
1964.14	78.3724	87.0481	70.3867	69.4374	88.8901	77.737	68.8975	4.98068
1965.11	78.3844	87.0299	70.4481	69.4578	88.9029	77.7178	68.9123	4.94085
1966.07	78.3966	87.0124	70.4705	69.4803	88.9022	77.6749	68.9281	4.91221
1967.04	78.4094	86.9959	70.4643	69.5038	88.8995	77.6196	68.9449	4.906
1968	78.4233	86.9804	70.4488	69.5255	88.909	77.5666	68.9628	4.92461
1968.96	78.4384	86.9652	70.4407	69.5408	88.94	77.5258	68.9813	4.96039
1969.93	78.4545	86.95	70.445	69.5458	88.9903	77.4969	69.0002	5.00007
1970.89	78.4716	86.9343	70.4522	69.5393	89.0473	77.471	69.0188	5.03179
1971.86	78.4893	86.9179	70.4456	69.5242	89.097	77.4375	69.0368	5.0501
1972.82	78.5072	86.901	70.4129	69.5059	89.1324	77.3929	69.0541	5.05651
1973.79	78.525	86.8838	70.3521	69.4908	89.1577	77.3449	69.0705	5.05605
1974.75	78.5424	86.8664	70.2717	69.4832	89.1838	77.3079	69.0862	5.0532
1975.71	78.559	86.8489	70.1818	69.4848	89.2192	77.2946	69.1012	5.04988
1976.68	78.5745	86.8311	70.0882	69.4955	89.2628	77.3085	69.116	5.0462
1977.64	78.5887	86.8126	69.9891	69.514	89.3048	77.3418	69.1306	5.04226
1978.61	78.6015	86.7931	69.8796	69.5383	89.3331	77.38	69.1452	5.03898
1979.57	78.6129	86.7725	69.7598	69.5651	89.3425	77.4097	69.1601	5.03741
1980.54	78.6234	86.7508	69.6384	69.5891	89.3385	77.4235	69.1752	5.03738
1981.5	78.6333	86.7284	69.532	69.6041	89.3347	77.421	69.1904	5.03718
1982.46	78.6432	86.7058	69.4595	69.6054	89.3449	77.4062	69.2056	5.03463
1983.43	78.6537	86.6836	69.4353	69.5926	89.3755	77.3828	69.2204	5.02841
1984.39	78.6649	86.6622	69.4651	69.5713	89.4223	77.3535	69.2349	5.01838
1985.36	78.6769	86.6421	69.5469	69.5512	89.4741	77.3196	69.2492	5.00432
1986.32	78.6896	86.6233	69.674	69.5418	89.518	77.2831	69.2638	4.9847
1987.29	78.703	86.6056	69.8357	69.5486	89.5456	77.2459	69.2793	4.95707
1988.25	78.7168	86.5887	70.0184	69.5703	89.5559	77.2108	69.296	4.92075
1989.21	78.7311	86.5722	70.2041	69.5989	89.5555	77.1792	69.3142	4.87989
1990.18	78.7458	86.5556	70.372	69.6249	89.5554	77.1526	69.3334	4.84421
1991.14	78.7607	86.5385	70.5043	69.6406	89.5669	77.1316	69.3531	4.82567
1992.11	78.7755	86.5208	70.5924	69.6436	89.5985	77.1165	69.3727	4.83237
1993.07	78.7901	86.5027	70.6415	69.6375	89.6536	77.1073	69.3919	4.86342
1994.03	78.8041	86.4844	70.668	69.6291	89.73	77.1029	69.4107	4.9084
1995	78.8174	86.4664	70.6918	69.626	89.8209	77.1011	69.4295	4.9522
1995.96	78.83	86.4488	70.7255	69.6329	89.9166	77.0987	69.4483	4.98244
1996.93	78.8418	86.4317	70.7683	69.6515	90.0072	77.0923	69.4673	4.99487
1997.89	78.853	86.4149	70.8074	69.6793	90.0841	77.0788	69.4863	4.99385
1998.86	78.8636	86.3982	70.8273	69.7118	90.142	77.0554	69.5048	4.9881
1999.82	78.8738	86.3814	70.82	69.7435	90.1791	77.0207	69.5225	4.98496
2000.78	78.8838	86.3644	70.7901	69.769	90.1972	76.9759	69.5394	4.98692
2001.75	78.894	86.3474	70.7526	69.7843	90.2015	76.9255	69.5555	4.99179
2002.71	78.9044	86.3303	70.7236	69.787	90.1979	76.8763	69.5715	4.99569
2003.68	78.9154	86.3133	70.7118	69.777	90.1916	76.8352	69.5876	4.99599
2004.64	78.9267	86.2966	70.715	69.7568	90.1863	76.8057	69.6043	4.99261
2005.61	78.9383	86.2801	70.7242	69.731	90.1851	76.7864	69.6216	4.98731
2006.57	78.95	86.2637	70.7315	69.7061	90.1915	76.7718	69.6391	4.98227
2007.53	78.9614	86.2476	70.7366	69.6887	90.2096	76.7555	69.6567	4.97903
2008.5	78.9725	86.2316	70.7463	69.6839	90.2431	76.7332	69.6739	4.97809
2009.46	78.9833	86.2158	70.7694	69.6941	90.2916	76.7037	69.6907	4.97872
2010.43	78.9938	86.1999	70.8093	69.7173	90.349	76.668	69.7071	4.97888
2011.39	79.0041	86.1839	70.8598	69.748	90.4037	76.6268	69.7231	4.97539
2012.36	79.0143	86.1676	70.9074	69.7785	90.4437	76.5806	69.7386	4.96501
2013.32	79.0245	86.1509	70.9388	69.8016	90.462	76.531	69.7536	4.94641
2014.28	79.0346	86.1337	70.9486	69.8136	90.4618	76.4832	69.7682	4.92175
2015.25	79.0444	86.1163	70.9433	69.8154	90.4564	76.4472	69.782	4.89678
2016.21	79.0538	86.0989	70.9387	69.8123	90.4638	76.435	69.7952	4.87855
2017.18	79.0629	86.0815	70.952	69.8117	90.4995	76.4548	69.8077	4.87214
2018.14	79.0715	86.0643	70.9942	69.8187	90.569	76.5066	69.8196	4.87805
2019.1	79.0797	86.0472	71.0647	69.8346	90.6651	76.5794	69.831	4.89217
2020.07	79.0875	86.0303	71.1518	69.8564	90.7703	76.6539	69.8421	4.90826
2021.03	79.0949	86.0138	71.2387	69.8783	90.8628	76.7095	69.8532	4.92115
2022	79.102	85.9979	71.3093	69.8953	90.9245	76.7315	69.8647	4.92888
2022.96	79.1089	85.9827	71.3549	69.9059	90.9474	76.7168	69.8768	4.93244
2023.93	79.1159	85.9682	71.3751	69.9125	90.9351	76.6735	69.8894	4.934
2024.89	79.1228	85.9542	71.3753	69.9193	90.9014	76.6155	69.9023	4.93512
2025.85	79.1296	85.9402	71.3636	69.9304	90.8648	76.5566	69.9153	4.93613
2026.82	79.1361	85.9259	71.3465	69.9476	90.841	76.504	69.9277	4.93679
2027.78	79.1422	85.911	71.3282	69.9702	90.8397	76.4571	69.9393	4.93714
2028.75	79.1476	85.8955	71.3109	69.9959	90.8621	76.4119	69.9499	4.9377
2029.71	79.152	85.8792	71.2969	70.0225	90.9044	76.3659	69.9595	4.93894
2030.68	79.1551	85.8621	71.29	70.0491	90.9613	76.3234	69.968	4.94055
2031.64	79.1567	85.8444	71.2955	70.0751	91.0292	76.2947	69.9753	4.94149
2032.6	79.1567	85.826	71.3186	70.1001	91.106	76.292	69.9813	4.94055
2033.57	79.1554	85.8072	71.3624	70.1229	91.1887	76.3204	69.986	4.9371
2034.53	79.1532	85.7883	71.4244	70.1414	91.2696	76.3731	69.9896	4.93125
2035.5	79.1506	85.7696	71.4954	70.1543	91.3345	76.4313	69.9923	4.92357
2036.46	79.148	85.7512	71.5596	70.1618	91.3651	76.4692	69.9945	4.91471
2037.43	79.1456	85.7332	71.5992	70.1672	91.3468	76.4655	69.9963	4.90547
2038.39	79.1433	85.7153	71.6016	70.1756	91.2756	76.4127	69.9978	4.89705
2039.35	79.1407	85.6971	71.5655	70.1928	91.165	76.321	69.9987	4.89114
2040.32	79.1375	85.6783	71.5039	70.2223	91.0444	76.2154	69.9989	4.8892
2041.28	79.1334	85.6588	71.4403	70.2637	90.9502	76.1252	69.9985	4.89158
2042.25	79.1286	85.6388	71.398	70.3127	90.9129	76.072	69.9976	4.897
2043.21	79.123	85.6183	71.3896	70.3622	90.9441	76.061	69.9964	4.90305
2044.17	79.1171	85.5978	71.4103	70.406	91.0316	76.0814	69.9953	4.9076
2045.14	79.1111	85.5775	71.4418	70.4403	91.1453	76.1127	69.9945	4.90982
2046.1	79.1055	85.5578	71.4622	70.4655	91.2502	76.1363	69.9939	4.91042
2047.07	79.1004	85.5388	71.4587	70.4844	91.3211	76.1436	69.9937	4.91062
2048.03	79.0961	85.5205	71.433	70.5004	91.3508	76.1372	69.9936	4.91109
2049	79.0925	85.5028	71.3972	70.5155	91.3486	76.1254	69.9937	4.91148
2049.96	79.0893	85.4856	71.3651	70.5297	91.3307	76.115	69.9939	4.91101
2050.92	79.0861	85.4686	71.3423	70.5426	91.3109	76.1061	69.9942	4.90936
2051.89	79.0826	85.4518	71.3232	70.5542	91.2941	76.093	69.9947	4.90708
2052.85	79.0789	85.4353	71.296	70.5663	91.2784	76.0696	69.9952	4.90515
2053.82	79.0752	85.4192	71.2503	70.582	91.2604	76.0349	69.9959	4.90414
2054.78	79.0719	85.4037	71.1843	70.6036	91.2405	75.9958	69.9967	4.90377
2055.75	79.0693	85.3886	71.1041	70.6318	91.2238	75.963	69.9978	4.90324
2056.71	79.0676	85.3739	71.0208	70.6648	91.2167	75.946	69.9992	4.90185
2057.67	79.0662	85.3592	70.9446	70.6998	91.2225	75.9476	70.0008	4.89929
2058.64	79.0646	85.3441	70.8811	70.7341	91.2389	75.962	70.0025	4.89536
2059.6	79.0622	85.3285	70.8305	70.7663	91.2591	75.9775	70.004	4.88952
2060.57	79.0584	85.3122	70.7892	70.7965	91.2752	75.9815	70.005	4.88109
2061.53	79.0532	85.2952	70.751	70.8252	91.2812	75.9661	70.0053	4.87004
2062.5	79.0468	85.2778	70.7103	70.8523	91.275	75.9312	70.0046	4.85795
2063.46	79.0396	85.26	70.664	70.8767	91.2571	75.8842	70.0032	4.84795
2064.42	79.0321	85.242	70.6129	70.8969	91.2313	75.8373	70.0014	4.84343
2065.39	79.0244	85.224	70.5619	70.912	91.2034	75.8019	69.9996	4.84608
2066.35	79.0171	85.206	70.5169	70.9221	91.1817	75.7835	69.9981	4.85467
2067.32	79.0103	85.1883	70.4805	70.9295	91.1757	75.7797	69.9971	4.86556
2068.28	79.0045	85.1709	70.4493	70.9374	91.193	75.7811	69.9968	4.8745
2069.25	78.9997	85.1538	70.4149	70.9497	91.236	75.7763	69.9971	4.87877
2070.21	78.9958	85.1369	70.3676	70.9696	91.2983	75.7569	69.9978	4.87813
2071.17	78.9923	85.1197	70.3031	70.9986	91.3658	75.7208	69.9987	4.87435
2072.14	78.9886	85.102	70.2258	71.0357	91.4214	75.6728	69.9995	4.86975
2073.1	78.9839	85.0835	70.1479	71.0767	91.4514	75.6217	69.9998	4.86589
2074.07	78.978	85.0641	70.0836	71.1162	91.4522	75.5776	69.9994	4.86315
2075.03	78.9711	85.0441	70.0435	71.148	91.4318	75.5491	69.9982	4.86107
2075.99	78.9638	85.0241	70.0299	71.1686	91.406	75.5421	69.9964	4.85902
2076.96	78.9568	85.0048	70.0366	71.1782	91.3898	75.5572	69.9945	4.85668
2077.92	78.9506	84.9866	70.0513	71.181	91.3898	75.5887	69.9933	4.85422
2078.89	78.9457	84.97	70.0603	71.1838	91.4009	75.6231	69.9936	4.85216
2079.85	78.9423	84.9549	70.052	71.1932	91.4094	75.642	69.9959	4.85119
2080.82	78.9403	84.9412	70.0196	71.2126	91.402	75.6272	70.0002	4.8519
2081.78	78.9396	84.9285	69.9638	71.2417	91.3738	75.5681	70.0062	4.85432
2082.74	78.94	84.9163	69.8913	71.2758	91.3316	75.4684	70.0132	4.85771
2083.71	78.9412	84.9042	69.8141	71.3088	91.2905	75.3458	70.0202	4.86051
2084.67	78.9427	84.8915	69.7456	71.3353	91.2655	75.2271	70.0265	4.86093
2085.64	78.9437	84.8782	69.6966	71.3525	91.2638	75.1383	70.0319	4.85779
2086.6	78.9439	84.864	69.6721	71.3612	91.2828	75.0951	70.0362	4.8512
2087.57	78.9427	84.8491	69.6702	71.3646	91.3128	75.0984	70.04	4.8427
2088.53	78.9403	84.834	69.6832	71.3665	91.3432	75.1355	70.0436	4.83456
2089.49	78.9372	84.8191	69.7018	71.3704	91.3671	75.1865	70.0475	4.82886
2090.46	78.9343	84.8048	69.7186	71.3781	91.3833	75.2331	70.052	4.82655
2091.42	78.9326	84.7916	69.731	71.3903	91.394	75.264	70.057	4.82727
2092.39	78.9328	84.7797	69.7421	71.4065	91.4025	75.2783	70.0629	4.82964
2093.35	78.9351	84.7691	69.7585	71.4256	91.412	75.2819	70.0696	4.832
2094.32	78.9395	84.7599	69.788	71.4469	91.4252	75.284	70.0771	4.83311
2095.28	78.9451	84.7514	69.8367	71.469	91.4457	75.2919	70.0855	4.83242
2096.24	78.951	84.7432	69.9083	71.4904	91.4771	75.3096	70.0944	4.83003
2097.21	78.9562	84.7345	70.0049	71.5092	91.5223	75.3371	70.1034	4.82635
2098.17	78.96	84.7246	70.1261	71.5239	91.5816	75.3726	70.1119	4.82178
2099.14	78.9624	84.7135	70.2692	71.5348	91.6517	75.4135	70.1194	4.81664
2100.1	78.9637	84.7012	70.426	71.5433	91.7254	75.4549	70.1256	4.8112
2101.06	78.9648	84.6884	70.5812	71.553	91.7928	75.4901	70.1304	4.80595
2102.03	78.9666	84.6758	70.7155	71.5676	91.8436	75.5102	70.1345	4.80161
2102.99	78.9696	84.6642	70.8105	71.5893	91.8694	75.5072	70.1384	4.79893
2103.96	78.9742	84.6538	70.8557	71.6173	91.8658	75.4778	70.1429	4.7983
2104.92	78.9799	84.6443	70.8544	71.6484	91.8348	75.4258	70.1483	4.79945
2105.89	78.9863	84.6355	70.8216	71.6778	91.7835	75.3621	70.1546	4.80151
2106.85	78.9925	84.6267	70.7766	71.7023	91.722	75.2996	70.1613	4.80341
2107.81	78.9982	84.6178	70.734	71.7212	91.6594	75.2486	70.168	4.80436
2108.78	79.0031	84.6087	70.6984	71.7378	91.6017	75.2124	70.1746	4.80418
2109.74	79.0072	84.5997	70.6649	71.757	91.5517	75.1887	70.1809	4.80312
2110.71	79.0105	84.5908	70.6258	71.7831	91.511	75.1723	70.1873	4.80151
2111.67	79.0136	84.5822	70.5786	71.8178	91.4823	75.1599	70.194	4.79948
2112.64	79.0166	84.5739	70.5297	71.8592	91.469	75.1512	70.2012	4.79699
2113.6	79.02	84.5659	70.492	71.9025	91.4737	75.1488	70.209	4.79404
2114.56	79.0241	84.5582	70.4798	71.9416	91.4957	75.1549	70.2171	4.79096
2115.53	79.0291	84.5506	70.5025	71.9719	91.5303	75.1696	70.2251	4.78826
2116.49	79.0346	84.5429	70.5614	71.9917	91.5714	75.1898	70.2327	4.78628
2117.46	79.0405	84.535	70.6499	72.0031	91.6138	75.2112	70.2398	4.78489
2118.42	79.0462	84.5266	70.7552	72.011	91.656	75.2286	70.2462	4.78347
2119.39	79.0515	84.5177	70.8613	72.0216	91.6985	75.2378	70.2523	4.78132
2120.35	79.0564	84.5084	70.9512	72.0399	91.7407	75.2355	70.2582	4.77819
2121.31	79.0612	84.4992	71.0103	72.0686	91.7782	75.2194	70.2642	4.77453
2122.28	79.0662	84.4905	71.0303	72.1071	91.8038	75.1899	70.2704	4.77122
2123.24	79.0718	84.4826	71.0126	72.1519	91.8102	75.1495	70.2766	4.76908
2124.21	79.0781	84.4756	70.9688	72.1979	91.7953	75.1035	70.2827	4.76832
2125.17	79.0854	84.4694	70.9179	72.2391	91.764	75.0597	70.2885	4.76843
2126.13	79.0933	84.4639	70.8794	72.2709	91.728	75.0267	70.2939	4.76849
2127.1	79.1017	84.4587	70.8675	72.2913	91.7014	75.0115	70.2989	4.76766
2128.06	79.1103	84.4539	70.8852	72.3009	91.6954	75.0187	70.3036	4.76558
[truncated: 2,021 more rows]
